# Supplementary material for: Accessing spiropiperidines from dihydropyridones through tandem triflation–allylation and ring-closing metathesis (RCM)
Source: Royal Society of Chemistry journal article supplement (doi:10.1039/d3ob00545c), 2023-01-01

## Accessing Spiropiperidines from Dihydropyridones through Tandem Triflation-Allylation and Ring-Closing Metathesis (RCM)

Naresh Gantasala,<sup>a,b</sup> Corentin Fournet,<sup>c</sup> Myriam Le Roch,<sup>c</sup> Claudia Lalli,<sup>c\*</sup>  
Srihari Pabbaraja,<sup>a,b\*</sup> Nicolas Gouault.<sup>c\*</sup>

AUTHOR ADDRESS.

<sup>a</sup>CSIR-Indian Institute of Chemical Technology, Uppal Road, Tarnaka, Hyderabad 500007, TS, India.

<sup>b</sup>Academy of Scientific and Innovative Research (AcSIR), Ghazibad 201002, India.

<sup>c</sup>Univ. Rennes, CNRS, ISCR (Institut des Sciences Chimiques de Rennes), UMR 6226, F-35000 Rennes, France.

## Synthesis of dihydropyridones 1:

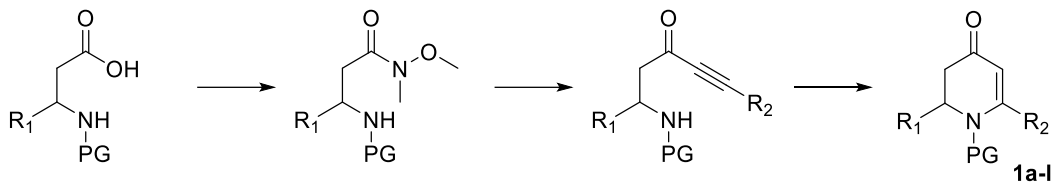

## Synthesis of dihydropyridones 1a-l:

Typical procedure for **N-protected- $\beta$ -amino-ynones** synthesis: to a stirred solution of alkyne (8.0 mmol, 4 eq) in THF (6mL) at  $-78\text{ }^{\circ}\text{C}$ , a 2.5 M solution of BuLi in hexane (7.7 mmol, 3.8 eq) was added dropwise. The solution was stirred for 1h. Then, a solution of Weinreb amide (2.0 mmol, 1 eq) in THF (10 mL) was dropwise added at  $-78\text{ }^{\circ}\text{C}$  and stirred for 15 min at the same temperature then at  $-50\text{ }^{\circ}\text{C}$  during 1h. The mixture was then allowed to warm to  $-5\text{ }^{\circ}\text{C}$  and, after 1.5 h, the reaction was quenched by addition of a 1M  $\text{NaH}_2\text{PO}_4$  solution (60 mL). The aqueous phase was diluted by addition of 25 mL of  $\text{NaH}_2\text{PO}_4$  (1M) and 50 mL of water, then extracted with EtOAc (3 x 40 mL). The combined organic layers were washed with brine, then dried over  $\text{Na}_2\text{SO}_4$  and evaporated *in vacuo*. Purification of the residue by flash chromatography (silica,  $\text{CH}_2\text{Cl}_2/\text{EtOAc}$  95/5) yielded pure amino-ynone intermediate.

Typical procedure for the gold-catalyzed cyclization (**1a-l**): to the amino ynone (2.0 mmol, 1eq) in 1,2-dichloroethane (9 mL) at room temperature under Argon atmosphere was added  $\text{PPh}_3\text{AuCl}$  (49 mg, 0.1 mmol, 5 mol%) and  $\text{AgSbF}_6$  (34 mg, 0.1 mmol, 5 mol%). After the resulting mixture was stirred at room temperature for 1 h,  $\text{Et}_2\text{O}$  (5 mL) was added and the resulting mixture was filtered through Celite<sup>®</sup>. After removal of solvents under reduced pressure, the crude product was purified by silica gel column chromatography using a mixture of cyclohexane and ethyl acetate (70/30) as an eluant to give **1**.

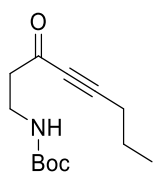

Yield: 84%. Clear oil.  $^1\text{H NMR}$  (300 MHz,  $\text{CDCl}_3$ )  $\delta$  4.93 (bs, NH), 3.41 (dd,  $J = 12.0, 6.0$  Hz, 2H), 2.78 (t,  $J = 6.0$  Hz, 2H), 2.35 (t,  $J = 7.0$  Hz, 2H), 1.61 (sext.,  $J = 7.0$  Hz, 2H), 1.43 (s, 9H), 1.02 (t,  $J = 7.0$  Hz, 3H); HRMS (ESI)  $m/z$  [ $\text{M}+\text{Na}$ ]<sup>+</sup> calcd for  $\text{C}_{13}\text{H}_{21}\text{NO}_3\text{Na}$  262.1414, found 262.1416.

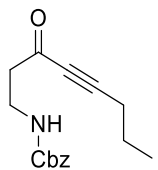

Yield: 88%. Clear oil.  $^1\text{H NMR}$  (300 MHz,  $\text{CDCl}_3$ )  $\delta$  7.40-7.25 (m, 5H), 5.26 (bs, NH), 5.10 (s, 2H), 3.49 (q,  $J = 5.9$  Hz, 2H), 2.82 (t,  $J = 5.8$  Hz, 2H), 2.35 (t,  $J = 7.3$  Hz, 2H), 1.61 (sext.,  $J = 7.3$  Hz, 2H), 1.02 (t,

$J = 7.3$  Hz, 3H);  $^{13}\text{C}$  NMR (75 MHz,  $\text{CDCl}_3$ )  $\delta$  186.5, 156.3, 136.5, 128.5, 128.1, 128.0, 95.5, 80.8, 66.7, 45.4, 35.6, 21.2, 20.9, 13.5; HRMS (ESI)  $m/z$   $[\text{M}+\text{Na}]^+$  calcd for  $\text{C}_{16}\text{H}_{19}\text{NO}_3\text{Na}$  296.1257, found 296.1259.

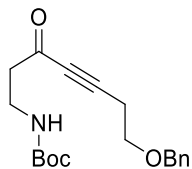

Yield: 90%. Clear oil.  $^1\text{H}$  NMR (300 MHz,  $\text{CDCl}_3$ )  $\delta$  7.38-7.27 (m, 5H), 4.95 (bs, NH), 4.56 (s, 2H), 3.63 (t,  $J = 6.7$  Hz, 2H), 3.40 (q,  $J = 6.0$  Hz, 2H), 2.77 (t,  $J = 6.0$  Hz, 2H), 2.67 (t,  $J = 6.7$  Hz, 2H), 1.43 (s, 9H);  $^{13}\text{C}$  NMR (75 MHz,  $\text{CDCl}_3$ )  $\delta$  186.6, 155.8, 137.7, 128.6, 127.95, 127.8, 92.0, 81.3, 79.4, 73.2, 67.1, 45.6, 35.2, 28.5, 20.6; HRMS (ESI)  $m/z$   $[\text{M}+\text{Na}]^+$  calcd for  $\text{C}_{19}\text{H}_{25}\text{NO}_4\text{Na}$  354.1676, found 354.1677.

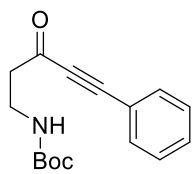

Yield: 90%. Clear oil.  $^1\text{H}$  NMR (300 MHz,  $\text{CDCl}_3$ )  $\delta$  7.59-7.39 (m, 5H), 4.98 (bs, 1H), 3.48 (q,  $J = 5.8$  Hz, 2H), 2.93 (t,  $J = 5.8$  Hz, 3H), 1.43 (s, 9H);  $^{13}\text{C}$  NMR ( $\text{CDCl}_3$ , 75 MHz):  $\delta$  186.6, 155.7, 133.1, 130.8, 128.6, 119.6, 91.7, 87.6, 79.4, 45.6, 35.2, 28.4; HRMS (EI,  $m/z$ )  $[\text{M} - \text{tBuO}]^+$  Calcd. for  $\text{C}_{12}\text{H}_{10}\text{NO}_2$ : 200.0711, found: 200.0709; IR (ATR) 3350, 2198, 1694, 1665  $\text{cm}^{-1}$ .

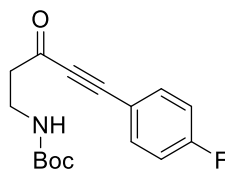

Yield: 96%. Clear oil.  $^1\text{H}$  NMR (300 MHz,  $\text{CDCl}_3$ )  $\delta$  7.61-7.55 (m, 2H), 7.12-7.06 (m, 2H), 4.95 (bs, 1H), 3.48 (q,  $J = 6.0$  Hz, 2H), 2.92 (t,  $J = 6.0$  Hz, 3H), 1.43 (s, 9H);  $^{13}\text{C}$  NMR ( $\text{CDCl}_3$ , 75 MHz):  $\delta$  186.5, 164.2 (d,  $^1J_{\text{CF}} = 254.2$  Hz), 155.9, 135.6 (d,  $^3J_{\text{CF}} = 9.0$  Hz), 116.3 (d,  $^2J_{\text{CF}} = 47.0$  Hz), 115.9, 90.6, 87.8, 79.6, 45.7, 35.3, 28.5.

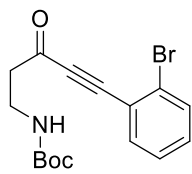

Yield: 97%. Pale yellow oil.  $^1\text{H}$  NMR (300 MHz,  $\text{CDCl}_3$ )  $\delta$  7.67-7.55 (m, 2H), 7.38-7.27 (m, 2H), 4.99 (bs, NH), 3.51 (q,  $J = 5.9$  Hz, 2H), 2.96 (t,  $J = 5.9$  Hz, 2H), 1.43 (s, 9H); HRMS (ESI)  $m/z$   $[\text{M}+\text{Na}]^+$  calcd for  $\text{C}_{16}\text{H}_{18}\text{NO}_3^{79}\text{BrNa}$  374.0362, found 374.0362.

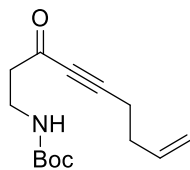

Yield: 84%. Yellow oil.  $^1\text{H}$  NMR (300 MHz,  $\text{CDCl}_3$ )  $\delta$  5.82 (ddt,  $J = 16.7, 10.2, 6.5$  Hz, 1H), 5.16-5.04 (m, 2H), 4.93 (brs, 1H), 3.40 (q,  $J = 6.0$  Hz, 2H), 2.77 (t,  $J = 5.8$  Hz, 2H), 2.50-2.42 (m, 2H), 2.37-2.27 (m, 2H), 1.42 (s, 9H);  $^{13}\text{C}$  NMR (75 MHz,  $\text{CDCl}_3$ )  $\delta$  186.9, 155.9, 135.9, 116.7, 94.5, 81.1, 79.5, 45.7, 35.3, 31.8, 28.5, 18.9; HRMS (ESI,  $m/z$ )  $[\text{M}+\text{Na}]^+$  Calcd for  $\text{C}_{14}\text{H}_{21}\text{NO}_3\text{Na}$  274.1414, found 274.1413.

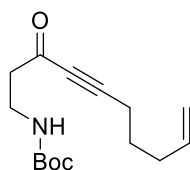

Yield: 92%. pale yellow oil.  $^1\text{H}$  NMR (300 MHz,  $\text{CDCl}_3$ )  $\delta$  5.76 (ddt,  $J = 16.9, 10.2, 6.7$  Hz, 1H), 5.10-4.98 (m, 2H), 4.93 (brs, 1H), 3.40 (q,  $J = 6.0$  Hz, 2H), 2.78 (t,  $J = 5.8$  Hz, 2H), 2.37 (t,  $J = 7.2$  Hz, 2H), 2.16 (qm,  $J = 7.2$  Hz, 2H), 1.67 (quint,  $J = 7.2$  Hz, 2H), 1.42 (s, 9H);  $^{13}\text{C}$  NMR (75 MHz,  $\text{CDCl}_3$ )  $\delta$  186.9, 155.9, 137.2, 116.0, 95.1, 81.0, 79.5, 45.7, 35.3, 32.8, 28.5, 26.9, 18.4.

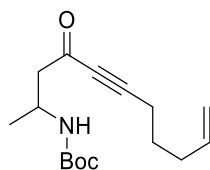

Yield: 78%. Clear oil.  $^1\text{H}$  NMR (300 MHz,  $\text{CDCl}_3$ )  $\delta$  5.79 (ddt,  $J = 17.0, 10.2, 6.6$  Hz, 1H), 5.10-4.97 (m, 2H), 4.77 (brs, 1H), 4.17-4.03 (m, 1H), 2.81 (dd,  $J = 16.3, 5.5$  Hz, 1H), 2.66 (dd,  $J = 16.3, 6.5$  Hz, 1H), 2.38 (t,  $J = 7.1$  Hz, 2H), 2.16 (q,  $J = 7.1$  Hz, 2H), 1.68 (quint.,  $J = 7.1$  Hz, 2H), 1.43 (s, 9H), 1.22 (d,  $J = 6.7$  Hz, 3H);  $^{13}\text{C}$  NMR (75 MHz,  $\text{CDCl}_3$ )  $\delta$  186.2, 155.1, 137.2, 116.0, 94.9, 81.3, 79.5, 51.5, 43.5, 32.9, 28.5, 26.9, 20.7, 18.4; HRMS (ESI)  $m/z$   $[\text{M}+\text{Na}]^+$  calcd for  $\text{C}_{16}\text{H}_{25}\text{NO}_3\text{Na}$  302.1727, found 302.1729.

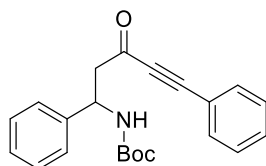

Yield: 97%. Clear oil.  $^1\text{H}$  NMR (300 MHz,  $\text{CDCl}_3$ )  $\delta$  7.59-7.54 (m, 2H), 7.49-7.24 (m, 8H), 5.38-5.20 (m, 2H), 3.28-3.11 (m, 2H), 1.41 (s, 9H);  $^{13}\text{C}$  NMR (75 MHz,  $\text{CDCl}_3$ )  $\delta$  185.1, 155.1, 141.2, 133.3, 131.0, 128.9, 128.7, 127.7, 126.5, 119.8, 92.2, 87.8, 79.9, 51.3, 28.5.

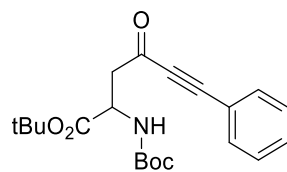

Yield: 89%. Light yellow oil. <sup>1</sup>H NMR (300 MHz, CDCl<sub>3</sub>) δ 7.60-7.56 (m, 2H), 7.49-7.37 (m, 3H), 5.42 (d, *J* = 8.3 Hz, 1H), 4.51 (dt, *J* = 8.3, 4.6 Hz, 1H), 3.33 (dd, *J* = 17.9, 4.6 Hz, 1H), 3.18 (dd, *J* = 17.9, 4.6 Hz, 1H), 1.46 (bs, 18H); <sup>13</sup>C NMR (75 MHz, CDCl<sub>3</sub>) δ 184.7, 169.8, 155.5, 133.2, 131.0, 128.7, 119.6, 92.0, 87.4, 82.5, 79.9, 50.2, 47.5, 28.3, 27.9; HRMS (ESI) *m/z* [M+H]<sup>+</sup> calcd for C<sub>21</sub>H<sub>28</sub>NO<sub>5</sub> 374.1968, found 374.1967; IR (DRA) 3368, 2974, 1715, 1669, 1489, 1154 cm<sup>-1</sup>.

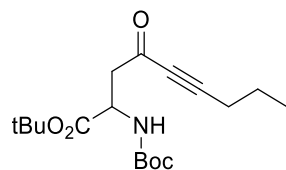

Yield: 95%. Clear oil. <sup>1</sup>H NMR (300 MHz, CDCl<sub>3</sub>) δ 5.38 (d, *J* = 8.6 Hz, 1H), 4.42 (dt, *J* = 8.6, 4.6 Hz, 1H), 3.20 (dd, *J* = 17.8, 4.6 Hz, 1H), 3.01 (dd, *J* = 17.8, 4.6 Hz, 1H), 2.35 (t, *J* = 7.1 Hz, 2H), 1.62 (sext., *J* = 7.1 Hz, 2H), 1.44 (s, 18H), 1.00 (t, *J* = 7.1 Hz, 3H); <sup>13</sup>C NMR (75 MHz, CDCl<sub>3</sub>) δ 183.9, 168.9, 154.5, 94.7, 81.3, 79.6, 78.8, 49.0, 46.5, 27.3, 26.8, 20.1, 19.9, 12.5; HRMS (ESI) *m/z* [M+Na]<sup>+</sup> calcd for C<sub>18</sub>H<sub>29</sub>NO<sub>5</sub>Na 362.1943, found 362.1946; IR (DRA) 3366, 1716, 1675, 1495, 1366 cm<sup>-1</sup>.

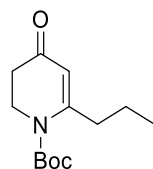

**(1a)**: Yield: 85%; clear oil; <sup>1</sup>H NMR (CDCl<sub>3</sub>, 300 MHz): δ 5.37 (s, 1H), 3.99 (t, *J* = 6.7 Hz, 2H), 2.65 (t, *J* = 7.3 Hz, 2H), 2.46 (t, *J* = 6.7 Hz, 2H), 1.56-1.48 (m, 2H), 1.52 (s, 9H), 0.93 (t, *J* = 7.3 Hz, 3H); <sup>13</sup>C NMR (CDCl<sub>3</sub>, 75 MHz) δ 194.9, 161.5, 152.1, 112.3, 83.0, 46.7, 37.7, 37.3, 28.1, 21.3, 13.7; HRMS (ESI, *m/z*) [M+Na]<sup>+</sup> Calcd for C<sub>13</sub>H<sub>21</sub>NO<sub>3</sub>Na 262.1414, found 262.1415.

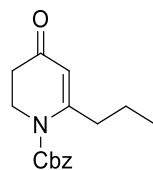

**(1b)**: Yield: 88%; clear oil; <sup>1</sup>H NMR (CDCl<sub>3</sub>, 300 MHz): δ 7.46-7.36 (m, 5H), 5.42 (s, 1H), 5.23 (s, 2H), 4.08 (t, *J* = 6.6 Hz, 2H), 2.65 (t, *J* = 7.3 Hz, 2H), 2.49 (t, *J* = 6.6 Hz, 2H), 1.47 (sext., *J* = 7.3 Hz, 2H), 0.86 (t, *J* = 7.3 Hz, 3H); <sup>13</sup>C NMR (CDCl<sub>3</sub>, 75 MHz) δ 194.7, 161.3, 153.1, 135.2, 128.8, 128.6, 128.2, 113.1, 100.0, 68.9, 46.8, 37.5, 37.3, 21.4, 13.8; HRMS (ESI) *m/z* [M+Na]<sup>+</sup> calcd for C<sub>16</sub>H<sub>19</sub>NO<sub>3</sub>Na 296.1257, found 296.1259.

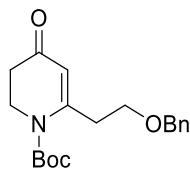

**(1c)**: Yield: 69%; clear oil;  $^1\text{H NMR}$  ( $\text{CDCl}_3$ , 300 MHz):  $\delta$  7.34-7.26 (m, 5H), 5.45 (s, 1H), 4.50 (s, 2H), 3.99 (t,  $J = 6.7$  Hz, 2H), 3.61 (t,  $J = 6.4$  Hz, 2H), 3.01 (t,  $J = 6.4$  Hz, 2H), 2.48 (t,  $J = 6.7$  Hz, 2H), 1.49 (s, 9H);  $^{13}\text{C NMR}$  ( $\text{CDCl}_3$ , 75 MHz)  $\delta$  194.6, 158.4, 152.0, 138.1, 128.5, 127.8, 127.7, 113.5, 83.1, 73.1, 67.8, 46.6, 37.4, 36.0, 28.1; HRMS (ESI,  $m/z$ )  $[\text{M}+\text{Na}]^+$  Calcd for  $\text{C}_{19}\text{H}_{25}\text{NO}_4\text{Na}$  354.1676, found 354.1679.

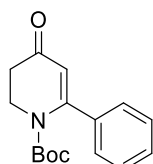

**(1d)**: Yield: 85%; white solid, mp: 118-119 °C;  $^1\text{H NMR}$  ( $\text{CDCl}_3$ , 300 MHz):  $\delta$  7.46-7.36 (m, 5H), 5.64 (s, 1H), 4.24 (t,  $J = 6.7$  Hz, 2H), 2.63 (t,  $J = 6.7$  Hz, 2H), 1.09 (s, 9H);  $^{13}\text{C NMR}$  ( $\text{CDCl}_3$ , 75 MHz)  $\delta$  194.4, 157.3, 151.9, 137.5, 129.4, 127.9, 126.1, 112.8, 81.9, 45.9, 37.6, 26.9; HRMS (ESI,  $m/z$ )  $[\text{M}+\text{Na}]^+$  Calcd for  $\text{C}_{16}\text{H}_{19}\text{NO}_3\text{Na}$  296.1263, found 296.1262; IR (DRA) 1712, 1665, 1590  $\text{cm}^{-1}$ .

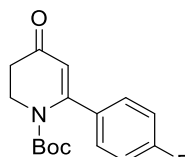

**(1e)**: Yield: 85%; yellow oil;  $^1\text{H NMR}$  ( $\text{CDCl}_3$ , 300 MHz):  $\delta$  7.45-7.36 (m, 2H), 7.13-7.05 (m, 2H), 5.61 (s, 1H), 4.22 (t,  $J = 6.6$  Hz, 2H), 2.62 (t,  $J = 6.6$  Hz, 2H), 1.14 (s, 9H).

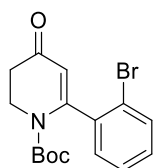

**(1f)**: Yield: 77%; yellow oil;  $^1\text{H NMR}$  ( $\text{CDCl}_3$ , 300 MHz):  $\delta$  7.58 (d,  $J = 6.7$  Hz, 1H), 7.45-7.17 (m, 3H), 5.37 (s, 1H), 4.25 (bs, 2H), 2.66 (dd,  $J = 6.7, 6.4$  Hz, 2H), 1.12 (s, 9H);  $^{13}\text{C NMR}$  ( $\text{CDCl}_3$ , 75 MHz)  $\delta$  194.8, 156.3, 151.7, 139.2, 132.7, 130.4, 129.9, 127.7, 121.0, 113.9, 82.8, 45.5, 37.6, 27.6; HRMS (ESI,  $m/z$ )  $[\text{M}+\text{Na}]^+$  Calcd for  $\text{C}_{16}\text{H}_{18}\text{NO}_3^{79}\text{BrNa}$  374.0362, found 374.0362.

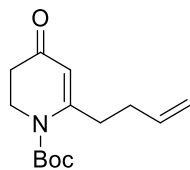

**(1g)**: Yield: 95%; CLEAR oil;  $^1\text{H}$  NMR ( $\text{CDCl}_3$ , 300 MHz):  $\delta$  5.76 (ddt,  $J = 16.9, 10.2, 6.6$  Hz, 1H), 5.37 (s, 1H), 5.07-4.97 (m, 2H), 3.99 (tm,  $J = 6.7$  Hz, 2H), 2.83-2.74 (m, 2H), 2.47 (tm,  $J = 6.7$  Hz, 2H), 2.30-2.19 (m, 2H), 1.53 (s, 9H);  $^{13}\text{C}$  NMR (75 MHz,  $\text{CDCl}_3$ )  $\delta$  194.9, 160.7, 152.1, 136.8, 116.0, 112.8, 83.2, 46.6, 37.4, 35.2, 32.2, 28.2; HRMS (ESI,  $m/z$ )  $[\text{M}+\text{Na}]^+$  Calcd for  $\text{C}_{14}\text{H}_{21}\text{NO}_3\text{Na}$  274.1414, found 274.1413.

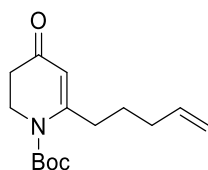

**(1h)**: Yield: 75%; clear oil;  $^1\text{H}$  NMR ( $\text{CDCl}_3$ , 300 MHz):  $\delta$  5.82-5.72 (m, 1H), 5.39 (s, 1H), 5.06-4.98 (m, 2H), 4.00 (t,  $J = 6.8$  Hz, 2H), 2.70 (t,  $J = 7.2$  Hz, 2H), 2.48 (t,  $J = 6.8$  Hz, 2H), 2.13-2.03 (m, 2H), 1.59 (quint.,  $J = 7.2$  Hz, 2H), 1.53 (s, 9H);  $^{13}\text{C}$  NMR ( $\text{CDCl}_3$ , 75 MHz)  $\delta$  194.9, 161.5, 152.1, 137.8, 115.5, 112.5, 83.2, 46.8, 37.4, 35.3, 33.3, 28.8, 27.3.

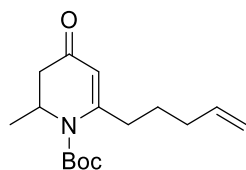

**(1i)**: Yield: 76%; clear oil;  $^1\text{H}$  NMR ( $\text{CDCl}_3$ , 300 MHz):  $\delta$  5.84-5.71 (m, 1H), 5.38 (s, 1H), 5.06-4.98 (m, 2H), 4.83-4.74 (m, 1H), 3.11-3.01 (m, 1H), 2.82 (dd,  $J = 17.0, 6.2$  Hz, 1H), 2.35-2.25 (m, 2H), 2.22-2.02 (m, 2H), 1.53 (s, 9H), 1.25 (d,  $J = 6.8$  Hz, 3H);  $^{13}\text{C}$  NMR ( $\text{CDCl}_3$ , 75 MHz)  $\delta$  193.8, 158.4, 137.8, 115.5, 111.2, 83.0, 52.2, 42.8, 35.4, 33.3, 28.2, 27.2, 16.6; HRMS (ESI,  $m/z$ )  $[\text{M}+\text{Na}]^+$  Calcd for  $\text{C}_{16}\text{H}_{25}\text{NO}_3\text{Na}$  302.1727, found 302.1730.

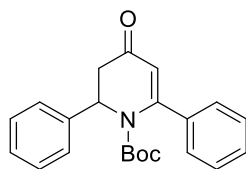

**(1j)**: Yield: 80%; clear oil;  $^1\text{H}$  NMR ( $\text{CDCl}_3$ , 300 MHz):  $\delta$  7.50-7.43 (m, 2H), 7.38-7.27 (m, 6H), 7.26-7.21 (m, 2H), 6.10-6.6.05 (m, 1H), 5.58 (d,  $J = 1.2$  Hz, 1H), 3.19 (dd,  $J = 17.5, 5.7$  Hz, 1H), 3.07 (ddd,  $J = 17.5, 1.8, 1.2$  Hz, 1H), 1.12 (s, 9H);  $^{13}\text{C}$  NMR ( $\text{CDCl}_3$ , 75 MHz)  $\delta$  194.1, 155.0, 153.4, 138.5, 138.4, 129.8, 128.5, 128.4, 127.9, 127.2, 126.2, 113.8, 82.9, 57.0, 40.8, 27.5.

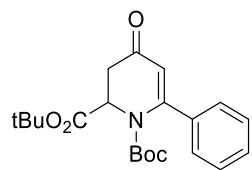

**(1k)**: Yield: 90%; clear oil;  $^1\text{H NMR}$  ( $\text{CDCl}_3$ , 300 MHz):  $\delta$  7.58-7.48 (m, 2H), 7.45-7.35 (m, 3H), 5.58 (d,  $J = 1.0$  Hz, 1H), 5.41 (dd,  $J = 6.2, 2.0$  Hz, 1H), 3.07 (ddd,  $J = 17.5, 1.9, 1.3$  Hz, 1H), 2.92 (dd,  $J = 17.5, 6.2$  Hz, 1H), 1.45 (s, 9H), 1.08 (s, 9H);  $^{13}\text{C NMR}$  ( $\text{CDCl}_3$ , 75 MHz)  $\delta$  192.7, 168.9, 157.2, 152.4, 138.0, 130.1, 128.4, 127.1, 113.2, 83.4, 83.2, 58.2, 40.1, 28.1, 27.5; HRMS (ESI,  $m/z$ )  $[\text{M}+\text{H}]^+$  Calcd for  $\text{C}_{21}\text{H}_{28}\text{NO}_5$  374.1968, found 374.1967; IR (DRA) 2971, 1723, 1679, 1385  $\text{cm}^{-1}$ .

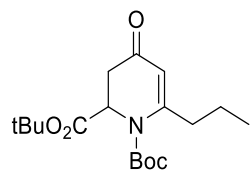

**(1l)**: Yield: 88%; light yellow oil;  $^1\text{H NMR}$  ( $\text{CDCl}_3$ , 300 MHz):  $\delta$  5.30 (s, 1H), 5.16 (dd,  $J = 6.5, 2.1$  Hz, 1H), 2.99-2.86 (m, 2H), 2.74 (dd,  $J = 17.3, 6.5$  Hz, 1H), 2.46-2.36 (m, 1H), 1.59 (sext.,  $J = 7.5$  Hz, 2H), 1.51 (s, 9H), 1.40 (s, 9H), 0.96 (t,  $J = 7.5$  Hz, 3H);  $^{13}\text{C NMR}$  ( $\text{CDCl}_3$ , 75 MHz)  $\delta$  192.1, 168.8, 161.0, 151.9, 111.3, 83.7, 82.9, 58.5, 38.7, 38.2, 28.2, 28.0, 21.6, 14.1; HRMS (ESI,  $m/z$ )  $[\text{M}+\text{Na}]^+$  Calcd for  $\text{C}_{18}\text{H}_{29}\text{NO}_5\text{Na}$  362.1943, found 362.1943; IR (DRA) 2975, 1727, 1668, 1310  $\text{cm}^{-1}$ .



# NMR Spectroscopic Data:

$^1\text{H}$  NMR of **2a** (300 MHz,  $\text{CDCl}_3$ )

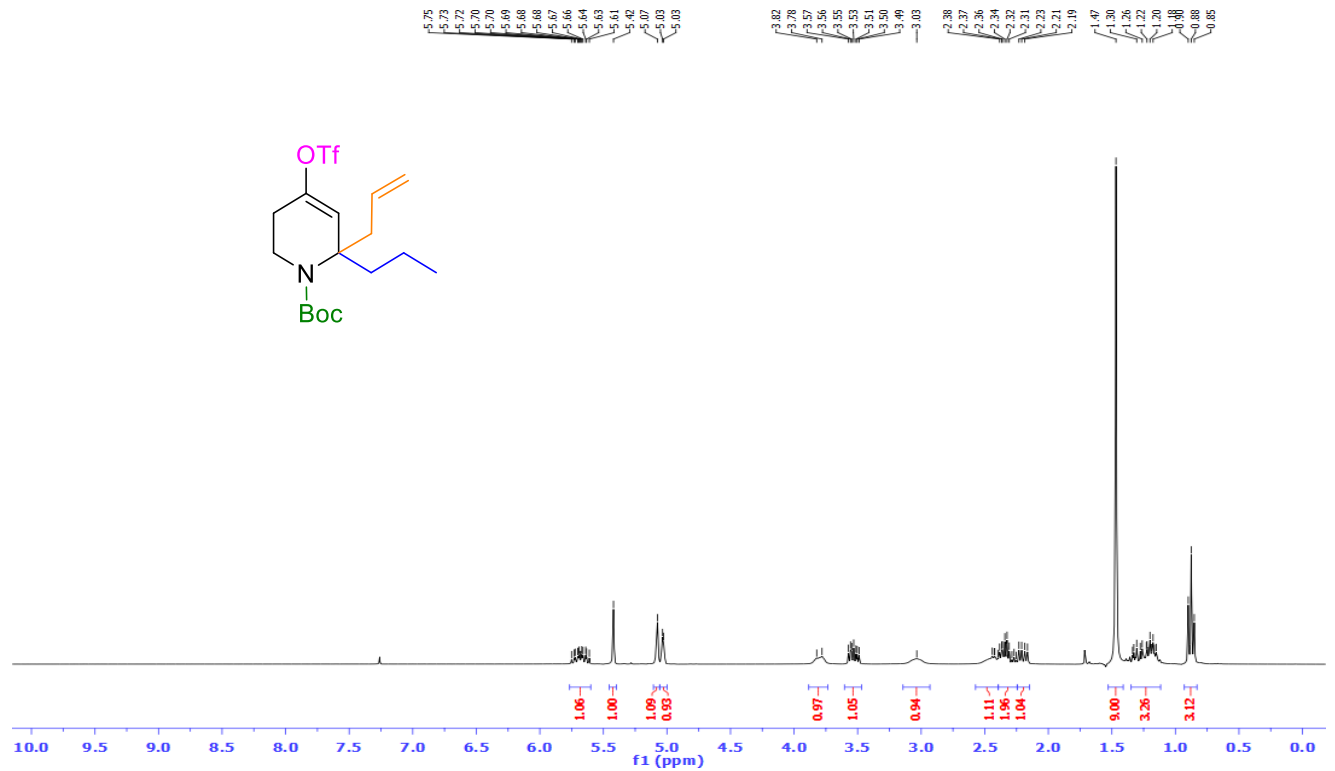

$^{13}\text{C}$  NMR of **2a** (75 MHz,  $\text{CDCl}_3$ )

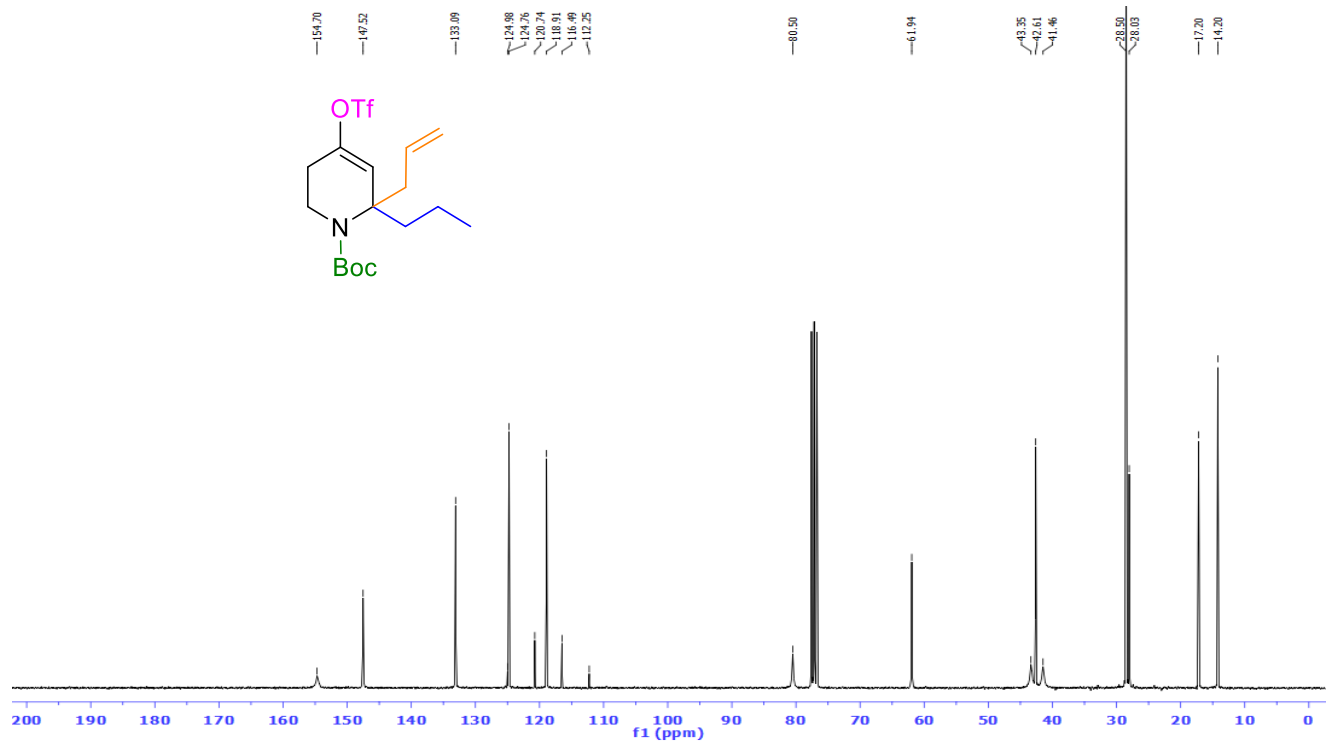

<sup>1</sup>H NMR of **2b** (300 MHz, CDCl<sub>3</sub>)

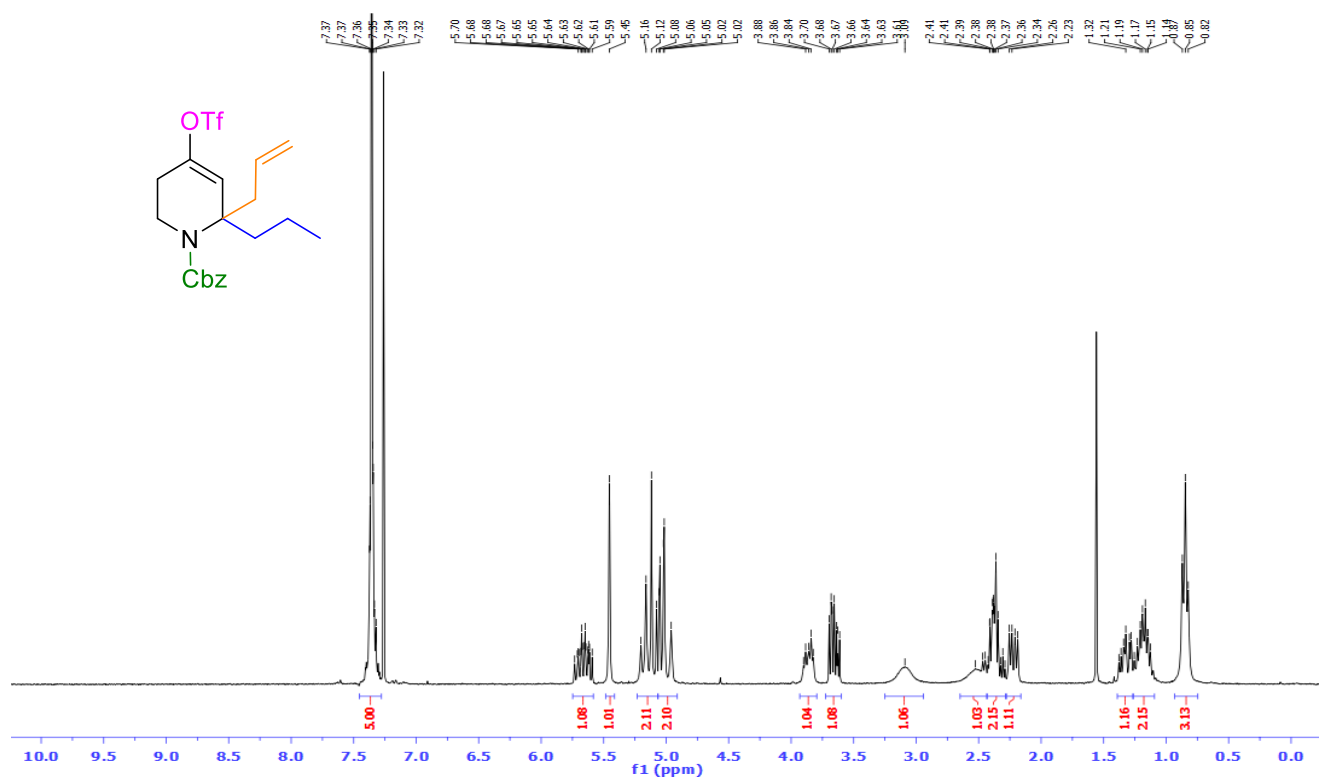

<sup>13</sup>C NMR of **2b** (75 MHz, CDCl<sub>3</sub>)

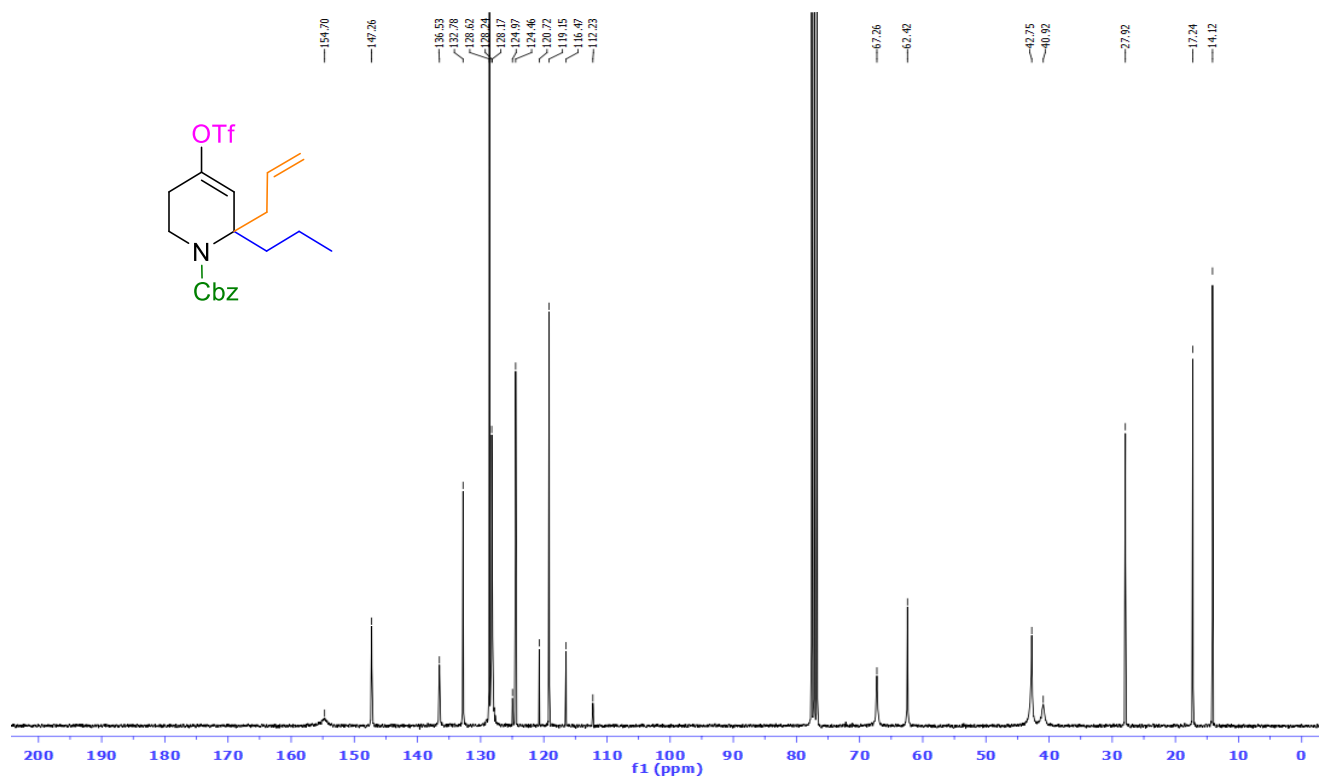

<sup>1</sup>H NMR of **2c** (300 MHz, CDCl<sub>3</sub>)

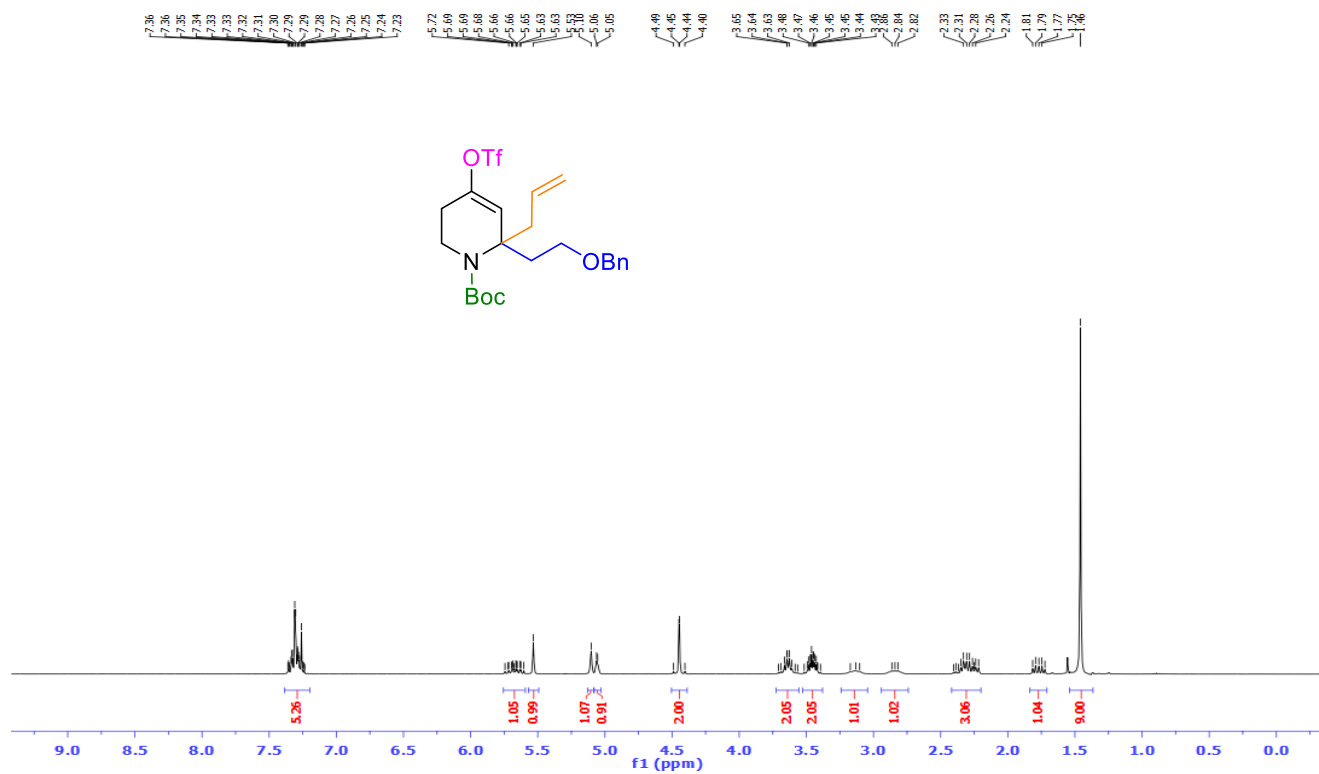

<sup>13</sup>C NMR of **2c** (75 MHz, CDCl<sub>3</sub>)

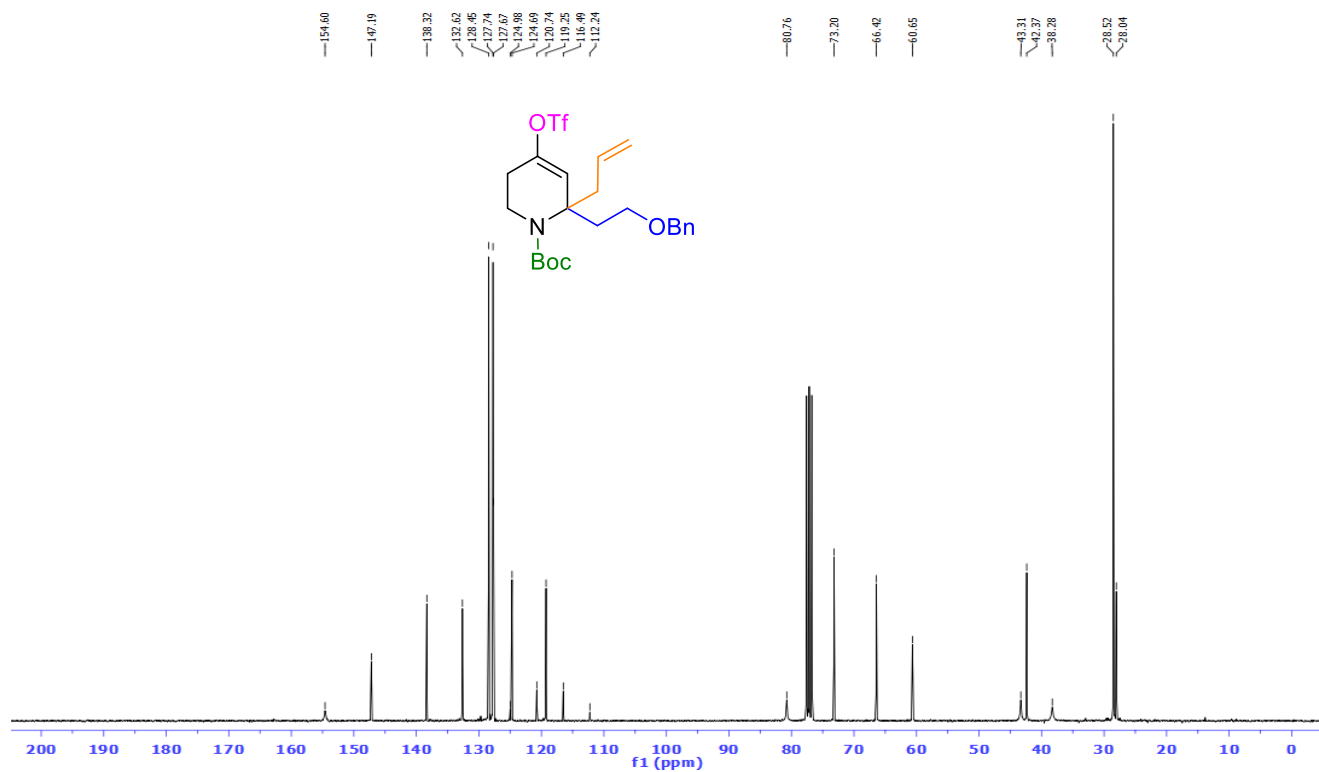

<sup>1</sup>H NMR of **2d** (300 MHz, CDCl<sub>3</sub>)

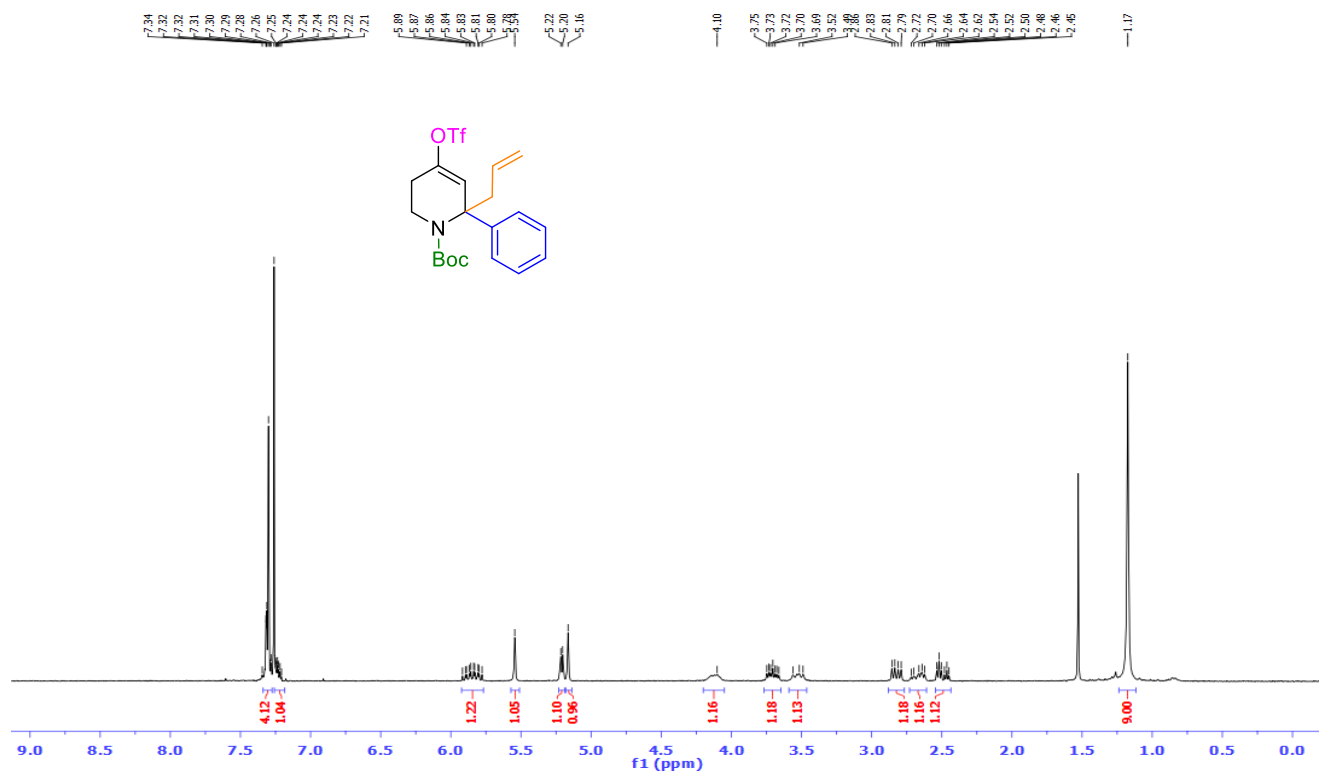

<sup>13</sup>C NMR of **2d** (75 MHz, CDCl<sub>3</sub>)

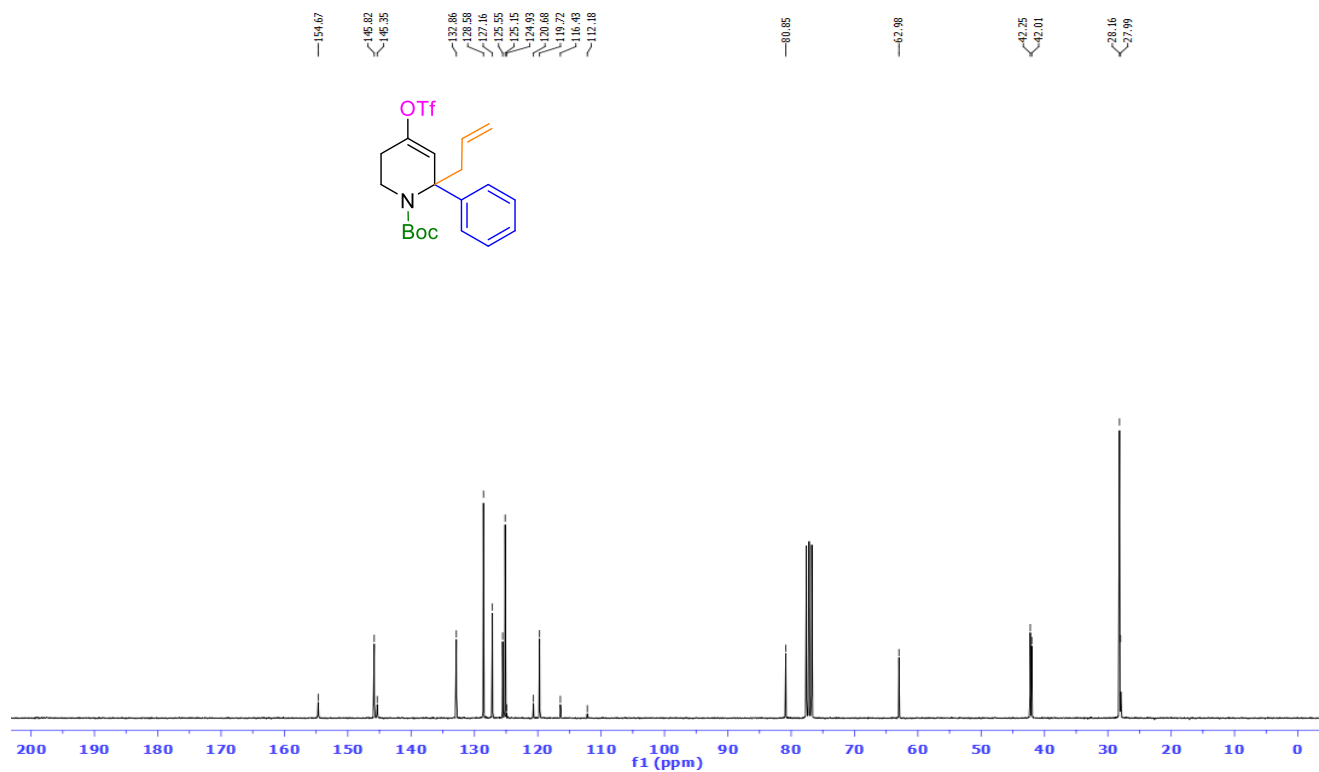

$^1\text{H}$  NMR of **2e** (300 MHz,  $\text{CDCl}_3$ )

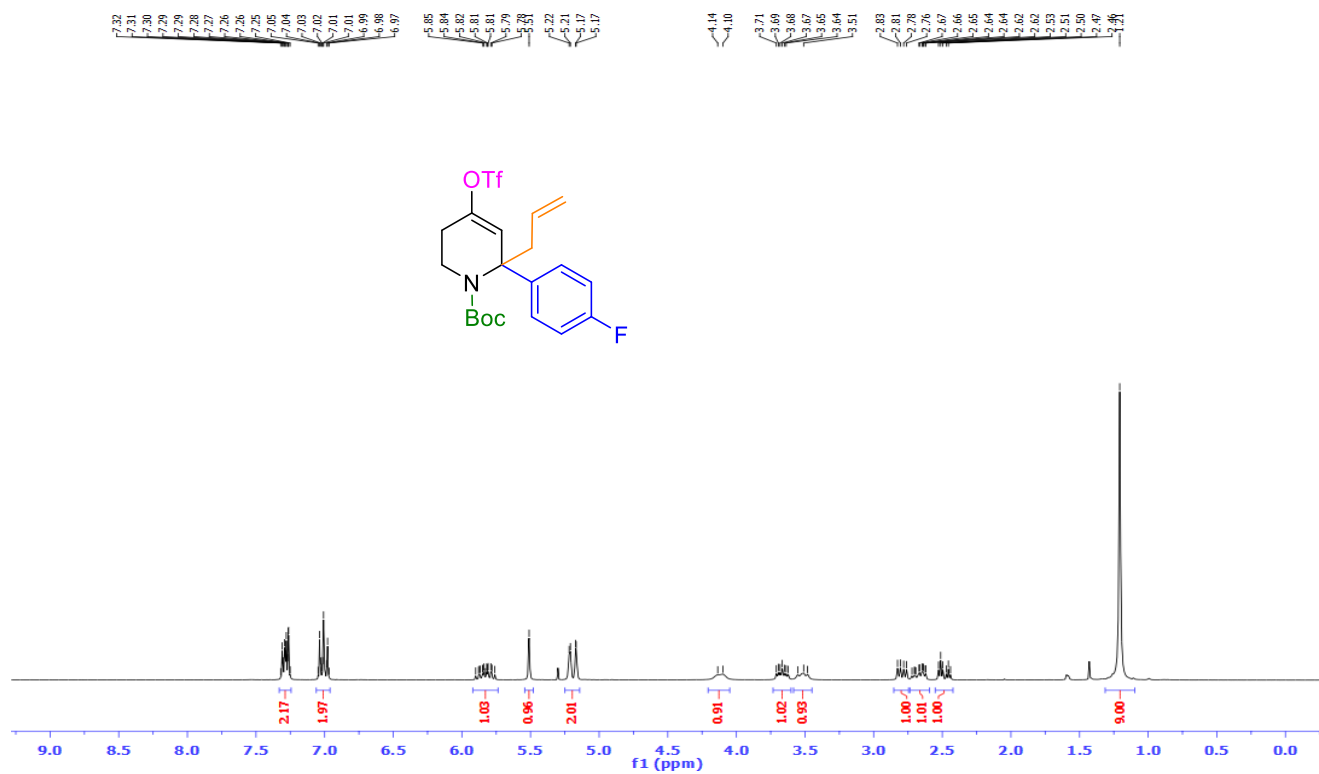

$^{13}\text{C}$  NMR of **2e** (75 MHz,  $\text{CDCl}_3$ )

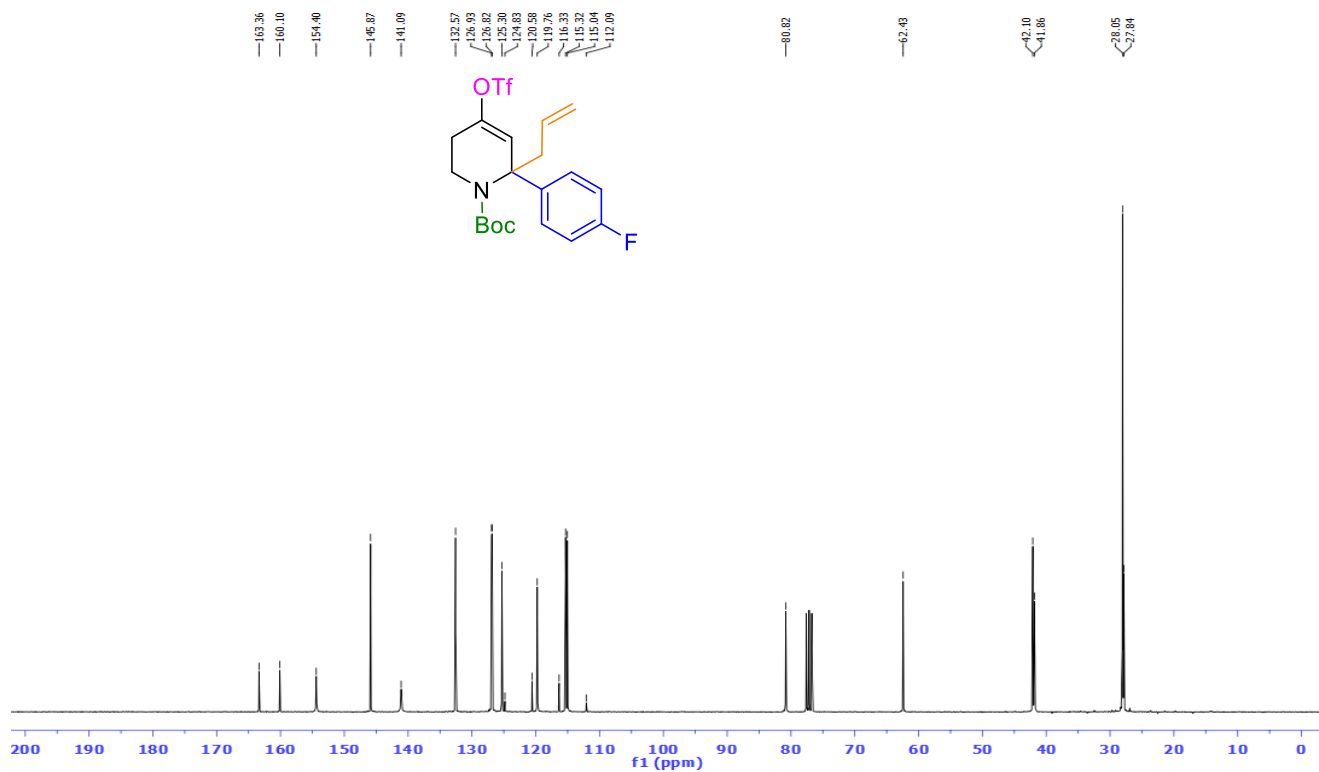

<sup>1</sup>H NMR of **2f** (300 MHz, CDCl<sub>3</sub>)

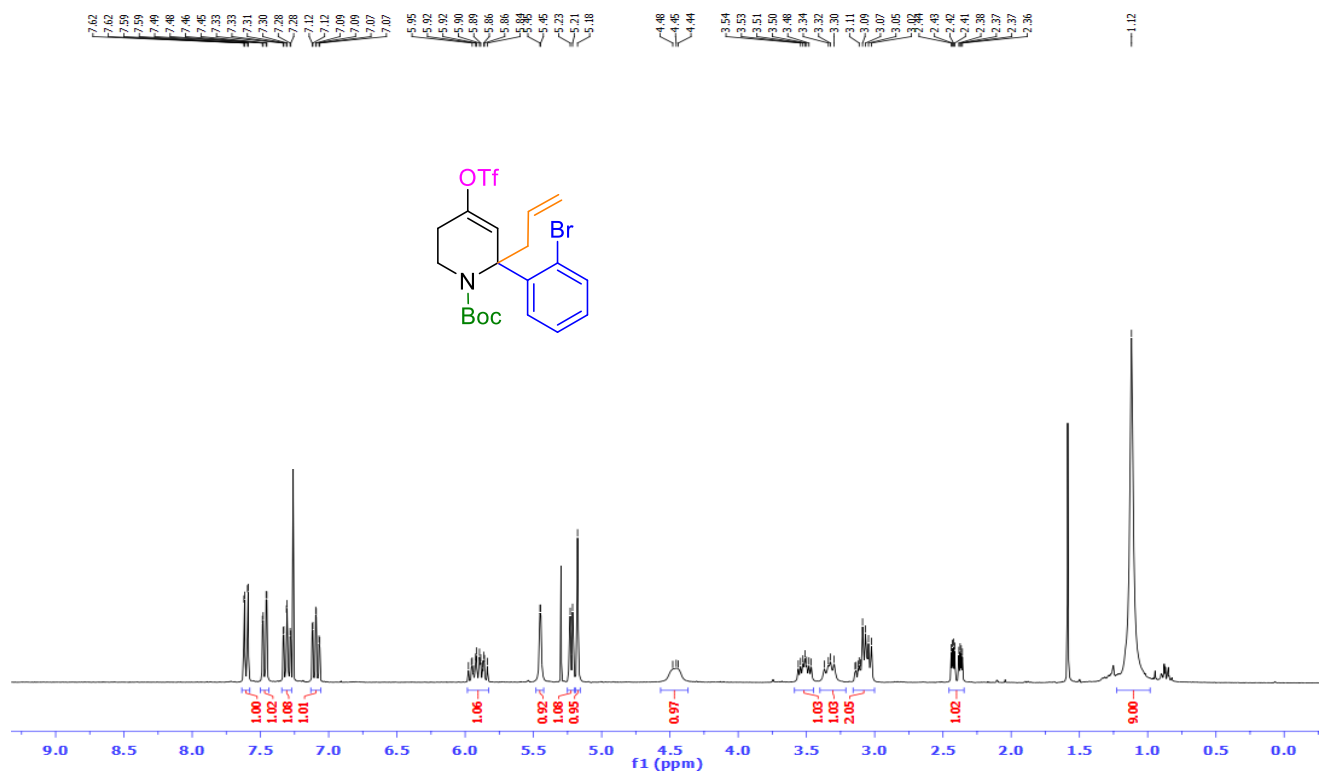

<sup>13</sup>C NMR of **2f** (75 MHz, CDCl<sub>3</sub>)

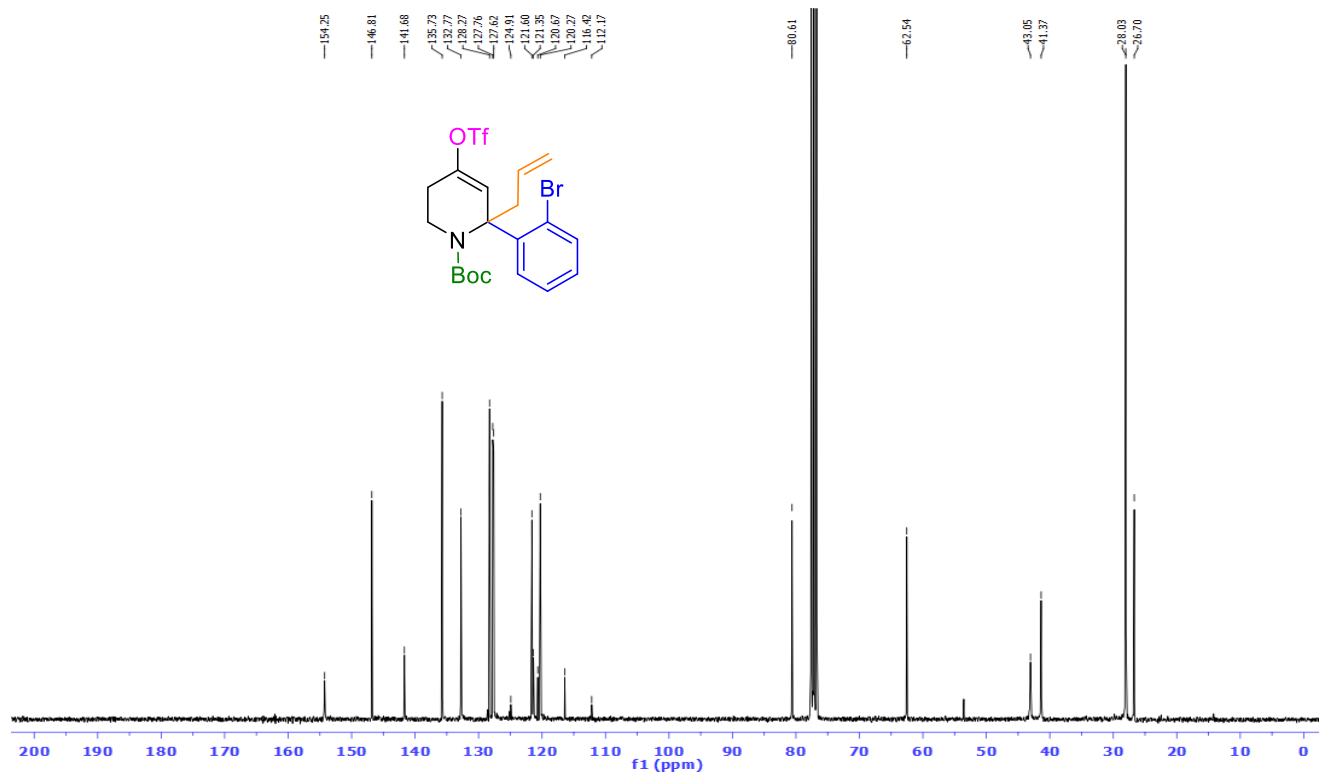

<sup>1</sup>H NMR of **2g** (300 MHz, CDCl<sub>3</sub>)

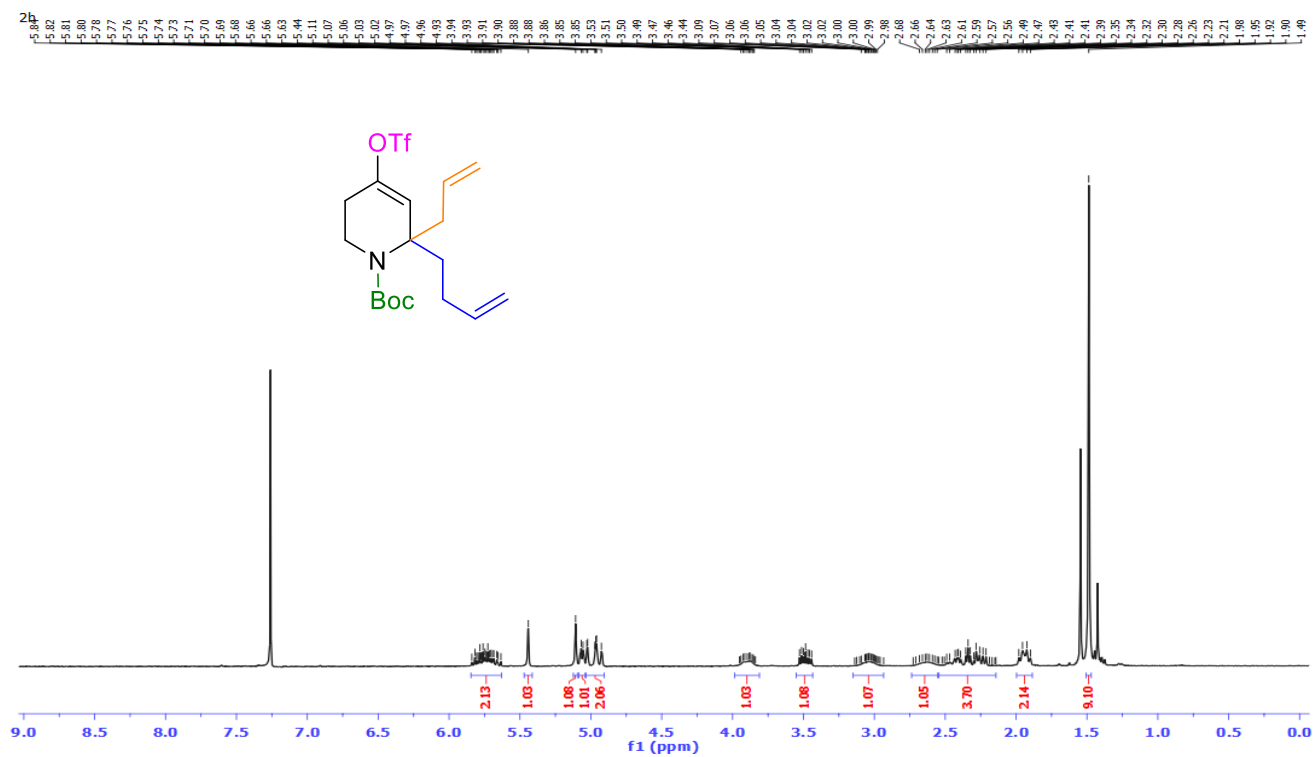

<sup>13</sup>C NMR of **2g** (75 MHz, CDCl<sub>3</sub>)

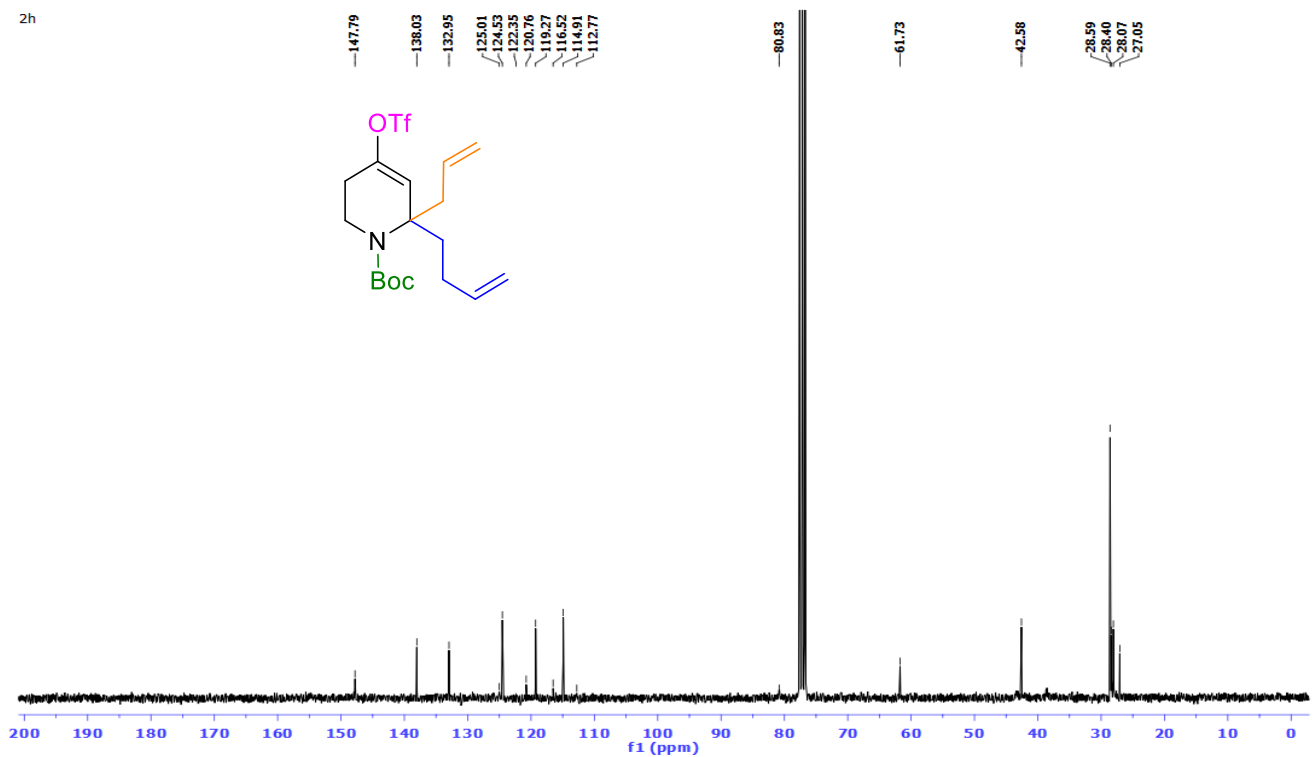

<sup>1</sup>H NMR of **2h** (300 MHz, CDCl<sub>3</sub>)

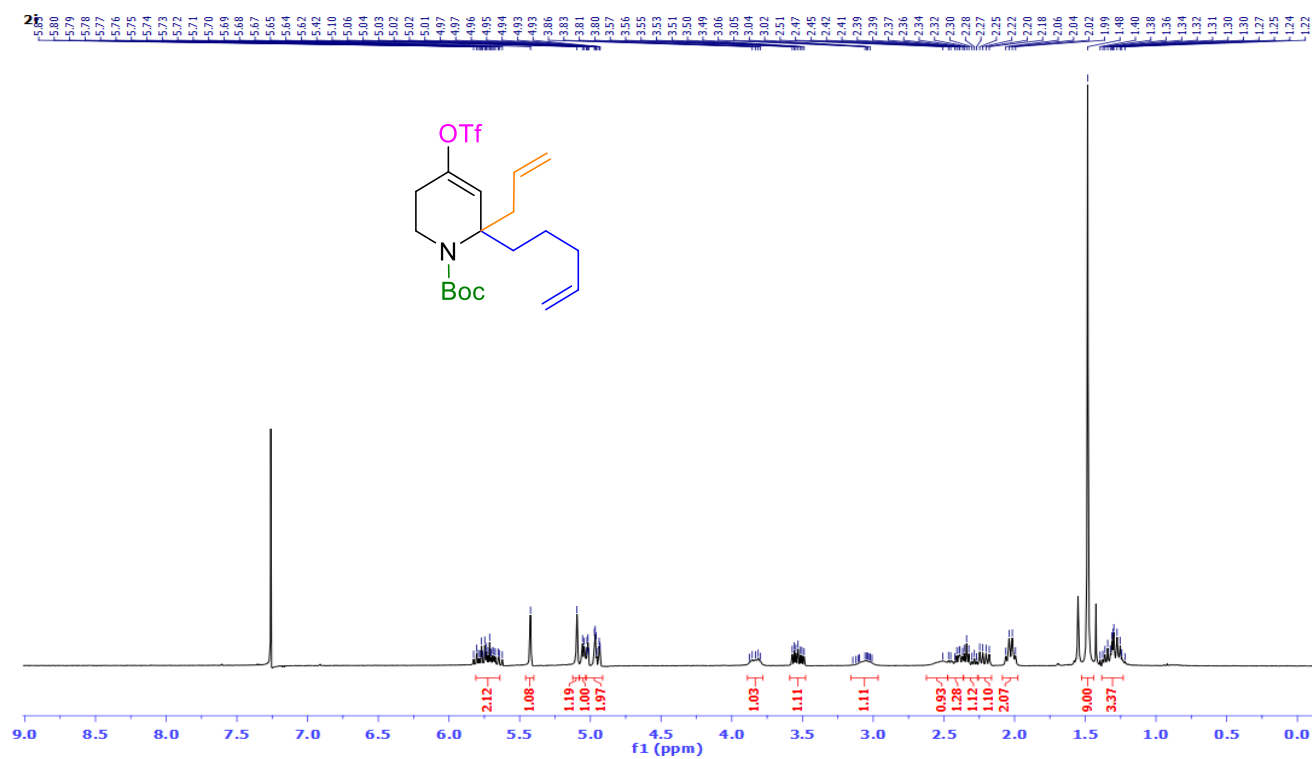

<sup>13</sup>C NMR of **2h** (75 MHz, CDCl<sub>3</sub>)

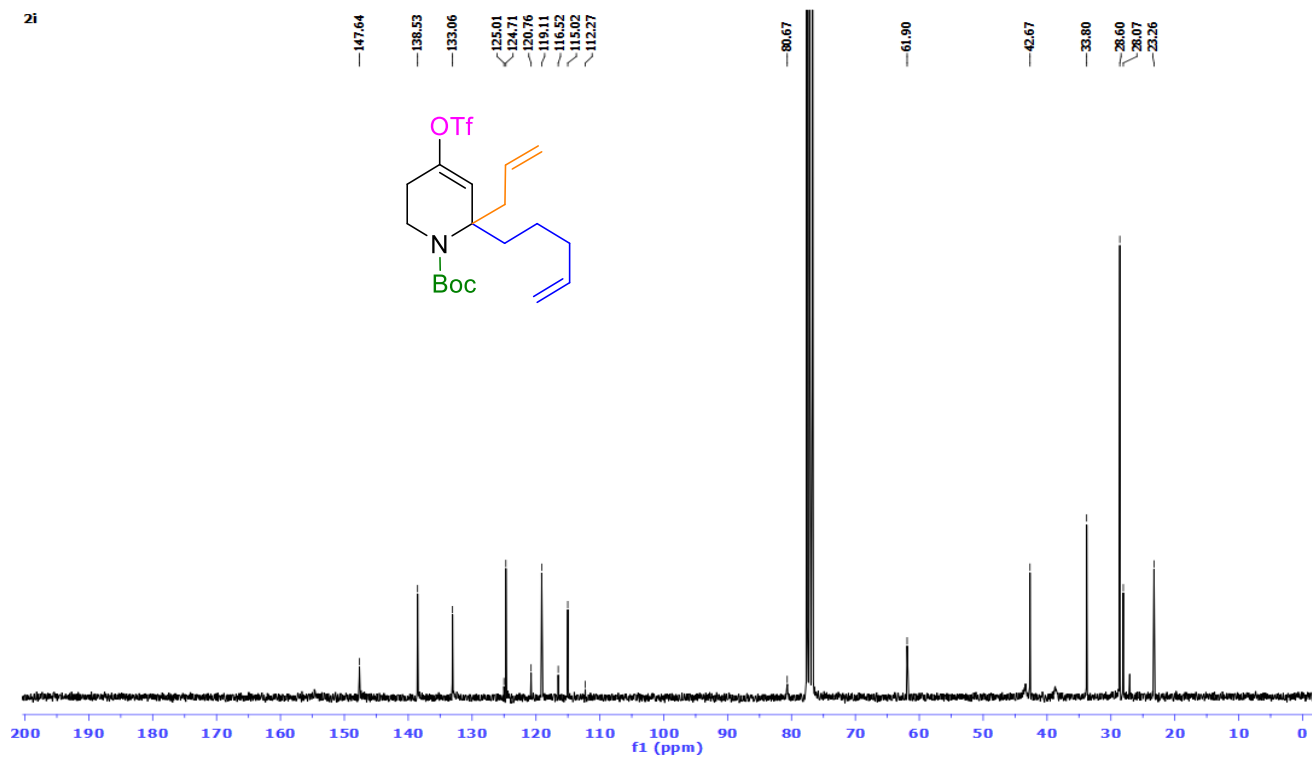



<sup>1</sup>H NMR of **2i** (300 MHz, CDCl<sub>3</sub>)

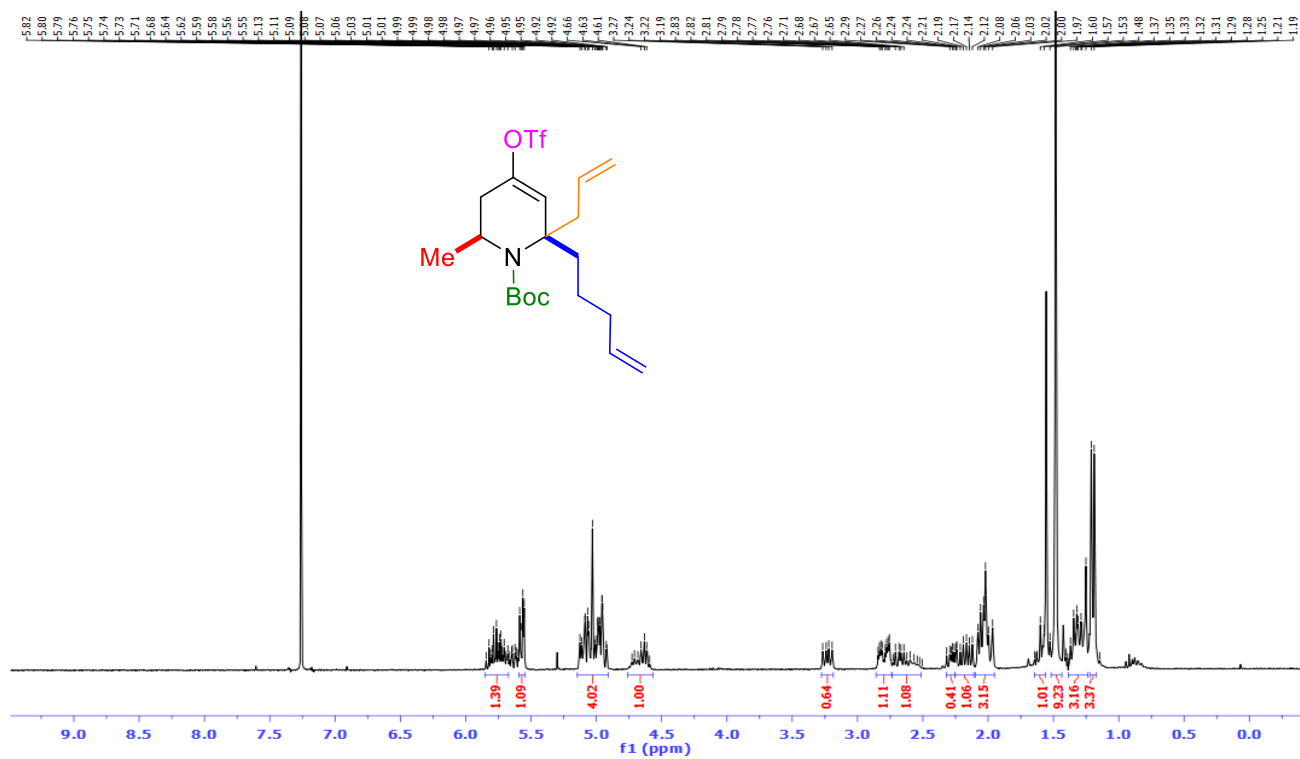

<sup>13</sup>C NMR of **2i** (75 MHz, CDCl<sub>3</sub>)

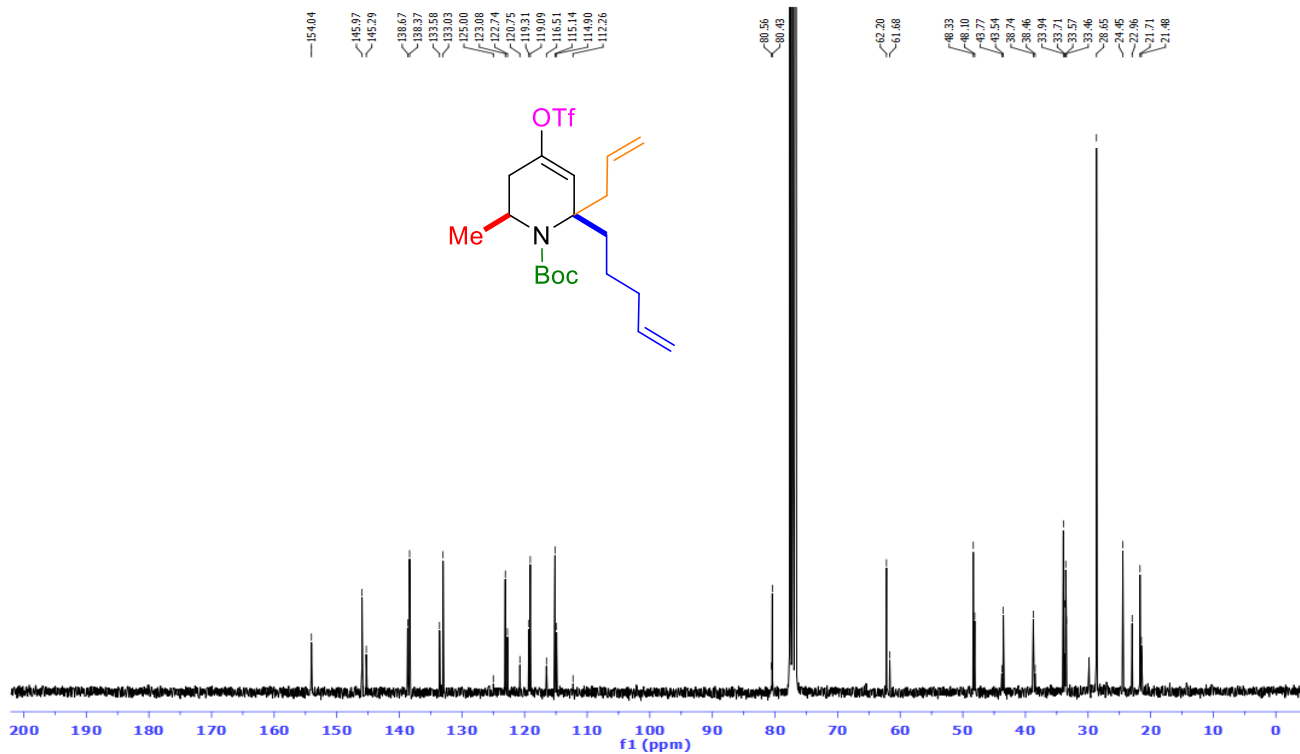

$^1\text{H}$  NMR of **2j** (300 MHz,  $\text{CDCl}_3$ )

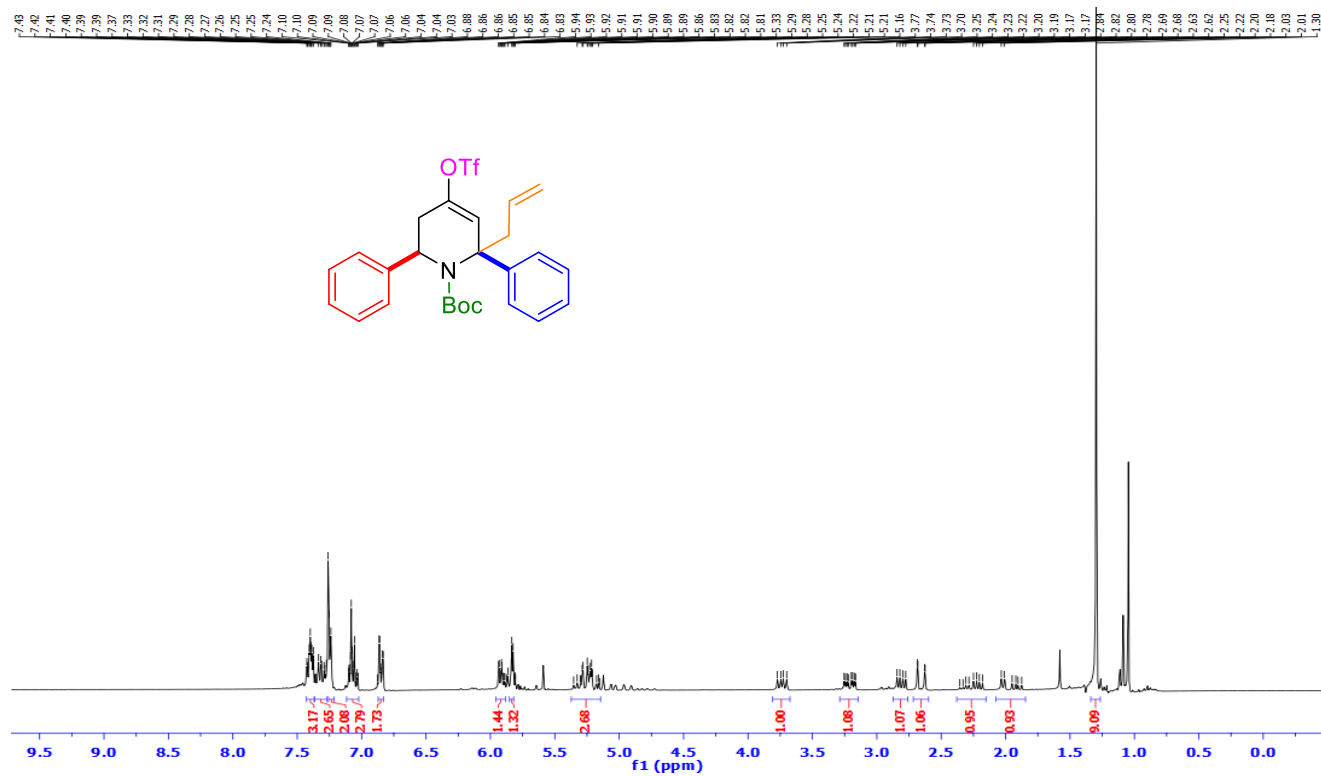

<sup>1</sup>H NMR of **2k** (300 MHz, CDCl<sub>3</sub>)

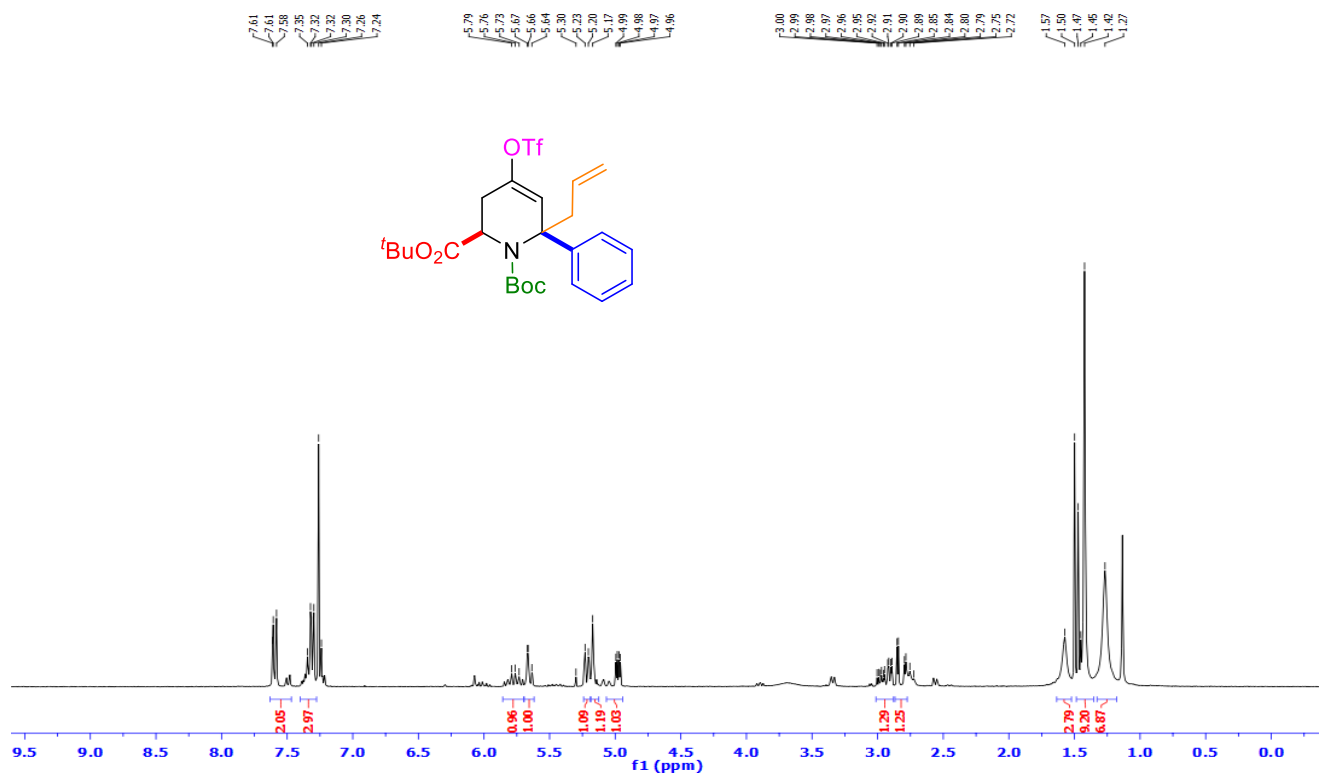

<sup>13</sup>C NMR of **2k** (75 MHz, CDCl<sub>3</sub>)

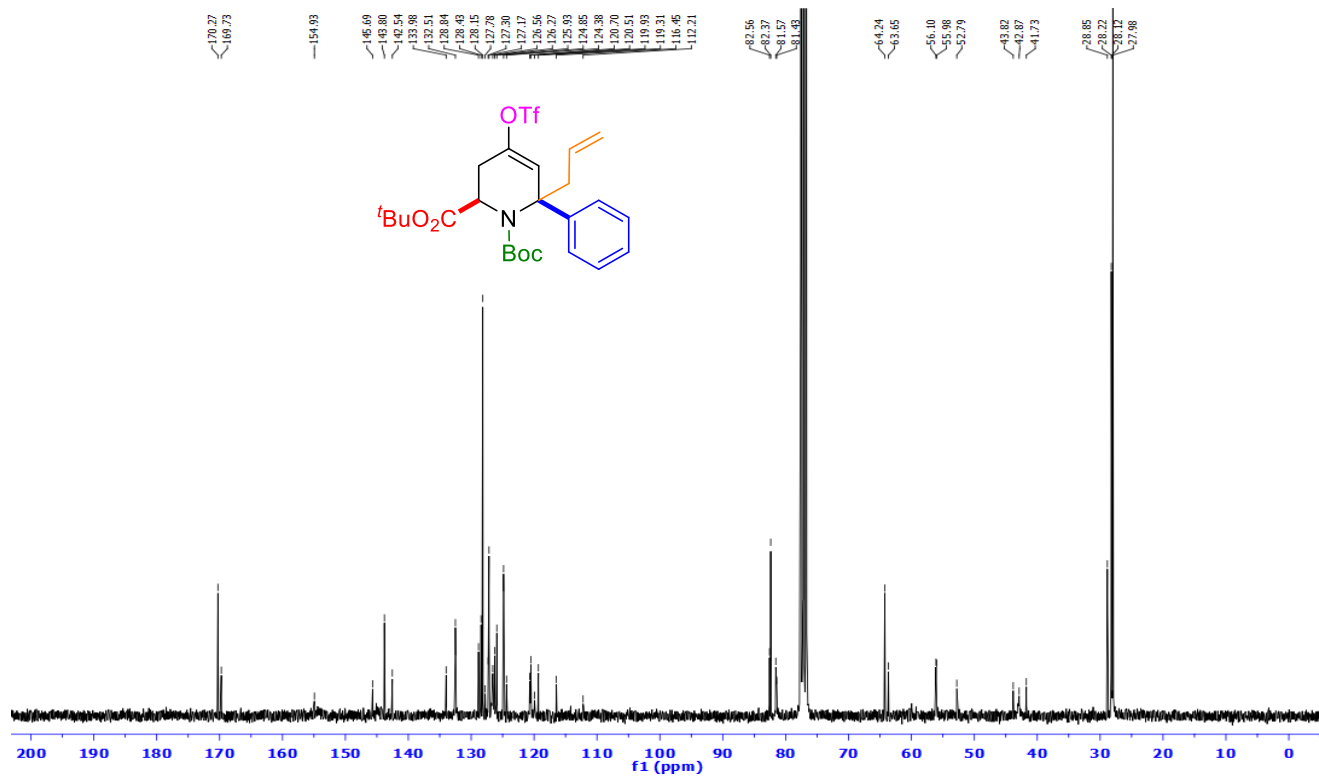

<sup>1</sup>H NMR of **2I** (300 MHz, CDCl<sub>3</sub>)

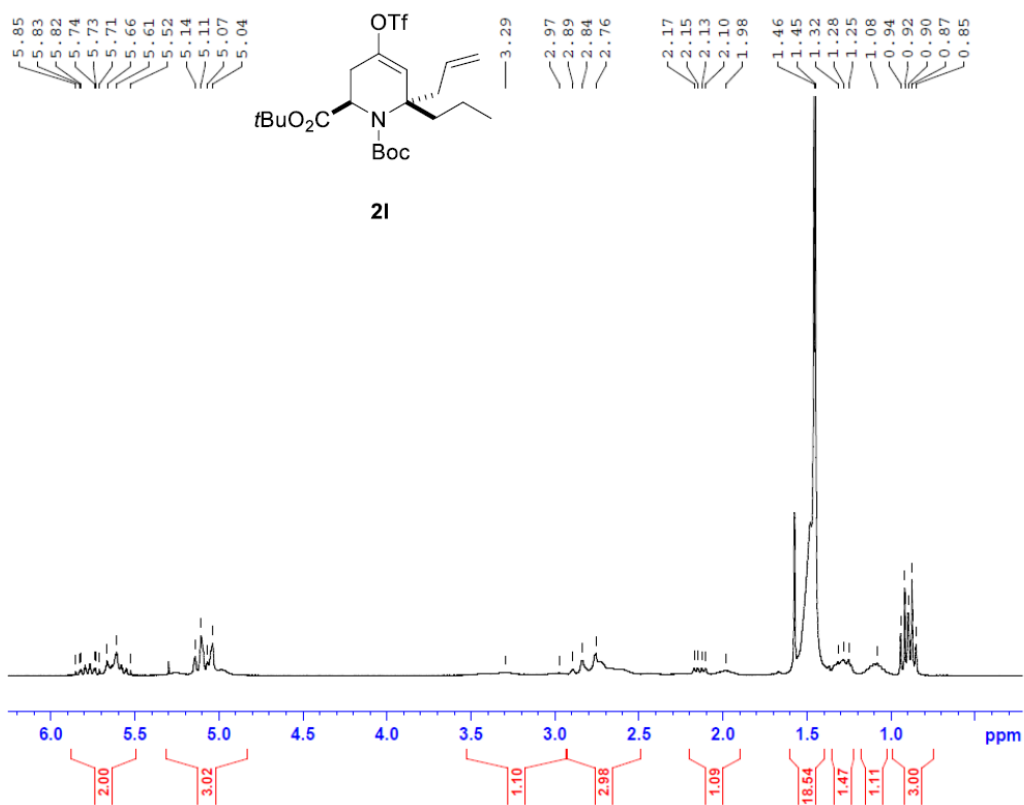

<sup>13</sup>C NMR of **2I** (300 MHz, CDCl<sub>3</sub>)

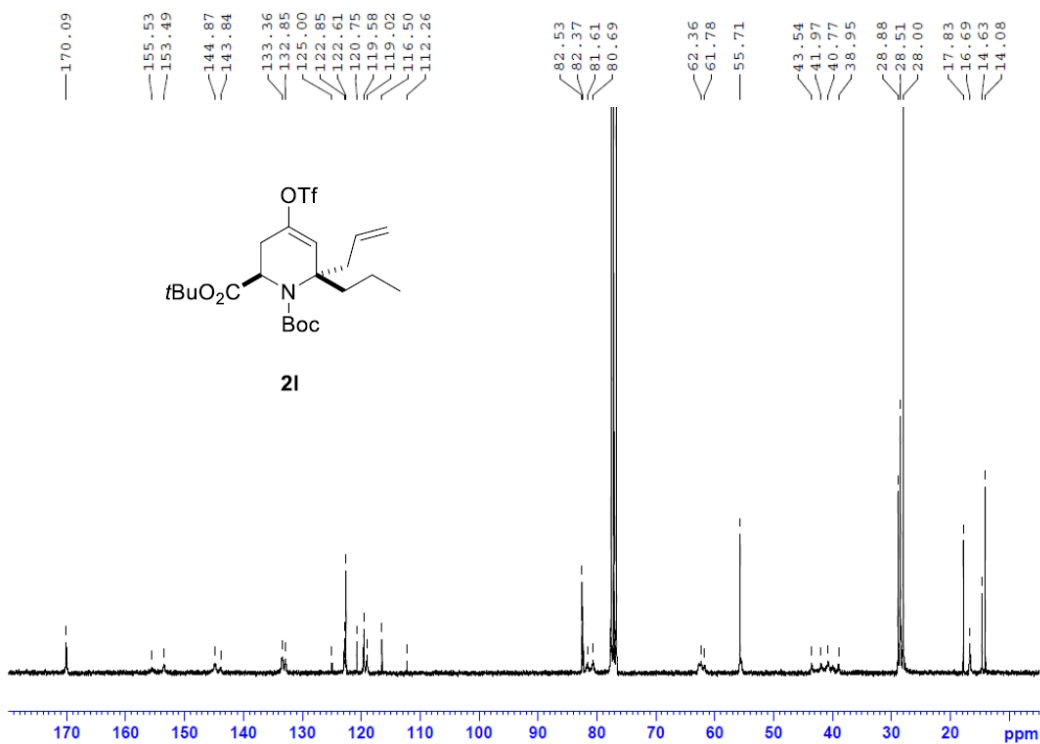

$^1\text{H}$  NMR of **2m** (300 MHz,  $\text{CDCl}_3$ )

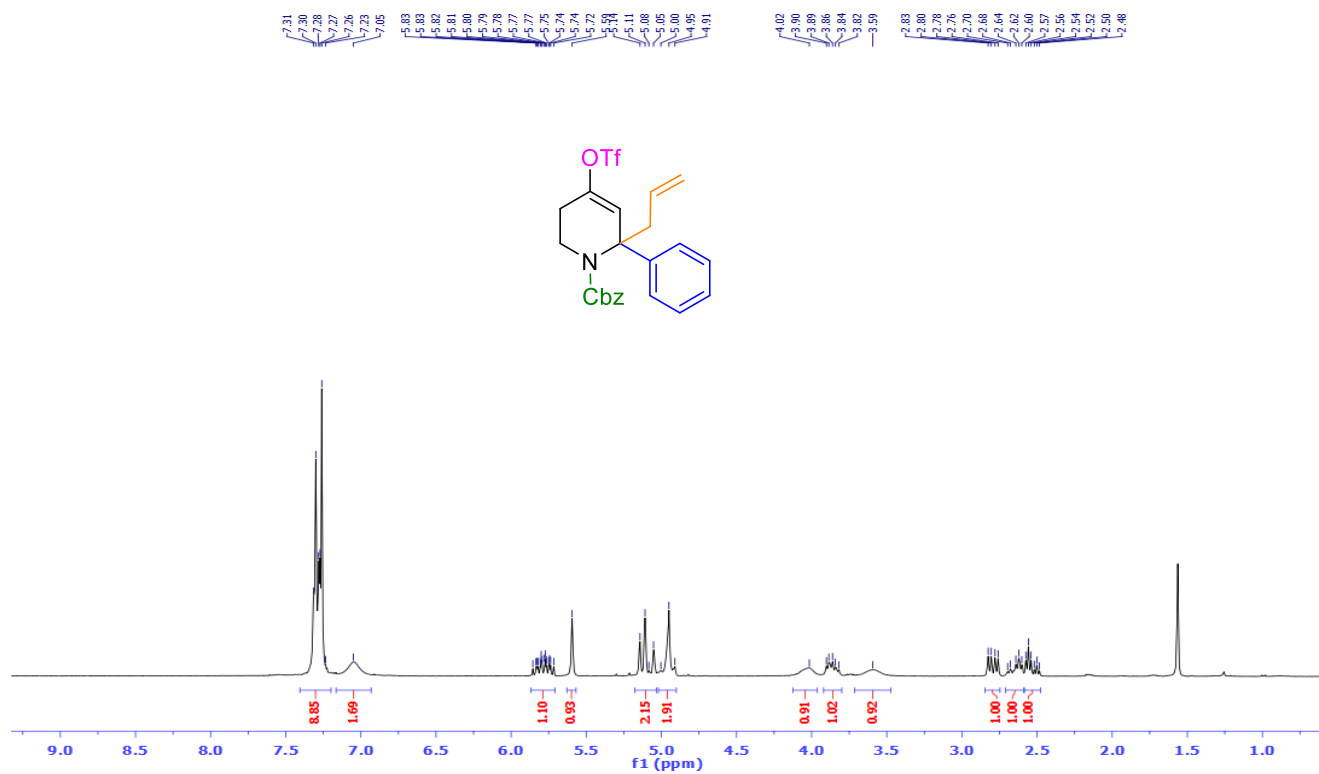

$^{13}\text{C}$  NMR of **2m** (75 MHz,  $\text{CDCl}_3$ )

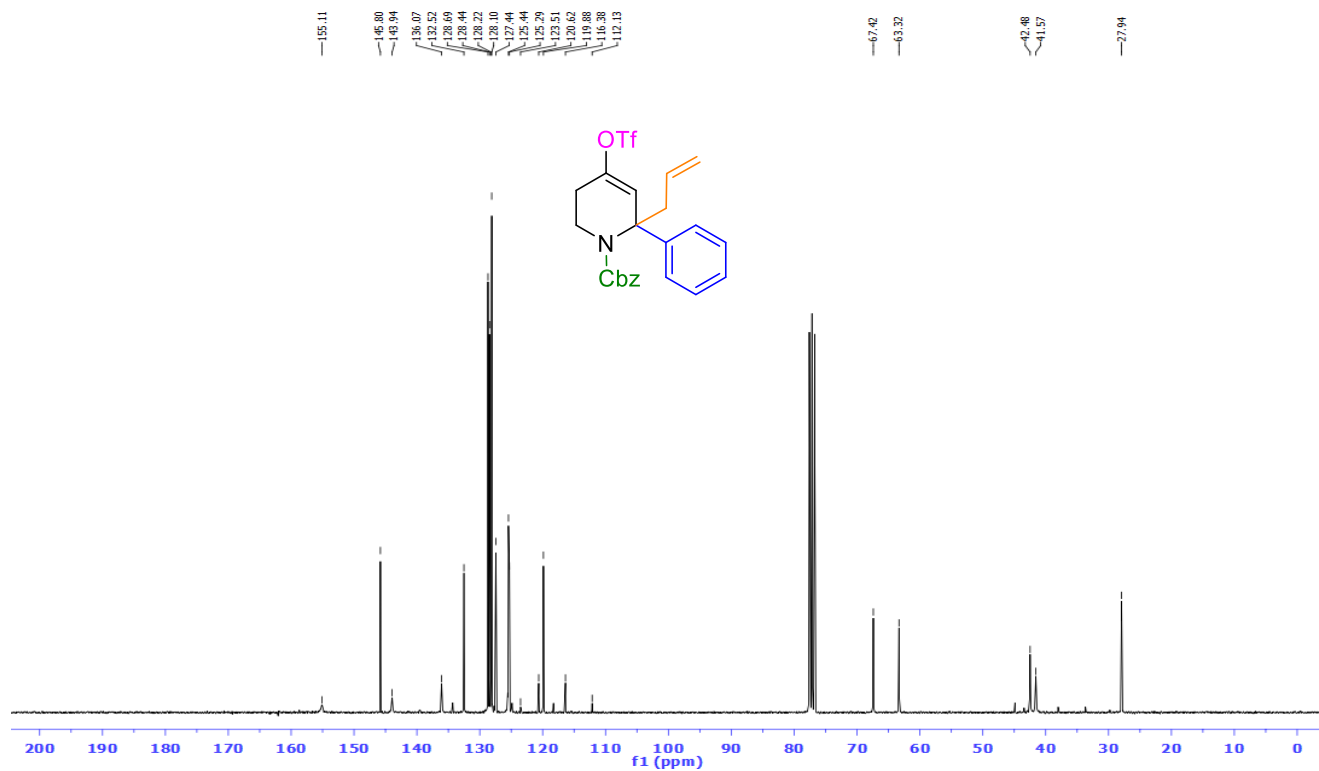

<sup>1</sup>H NMR of **3d** (300 MHz, CDCl<sub>3</sub>)

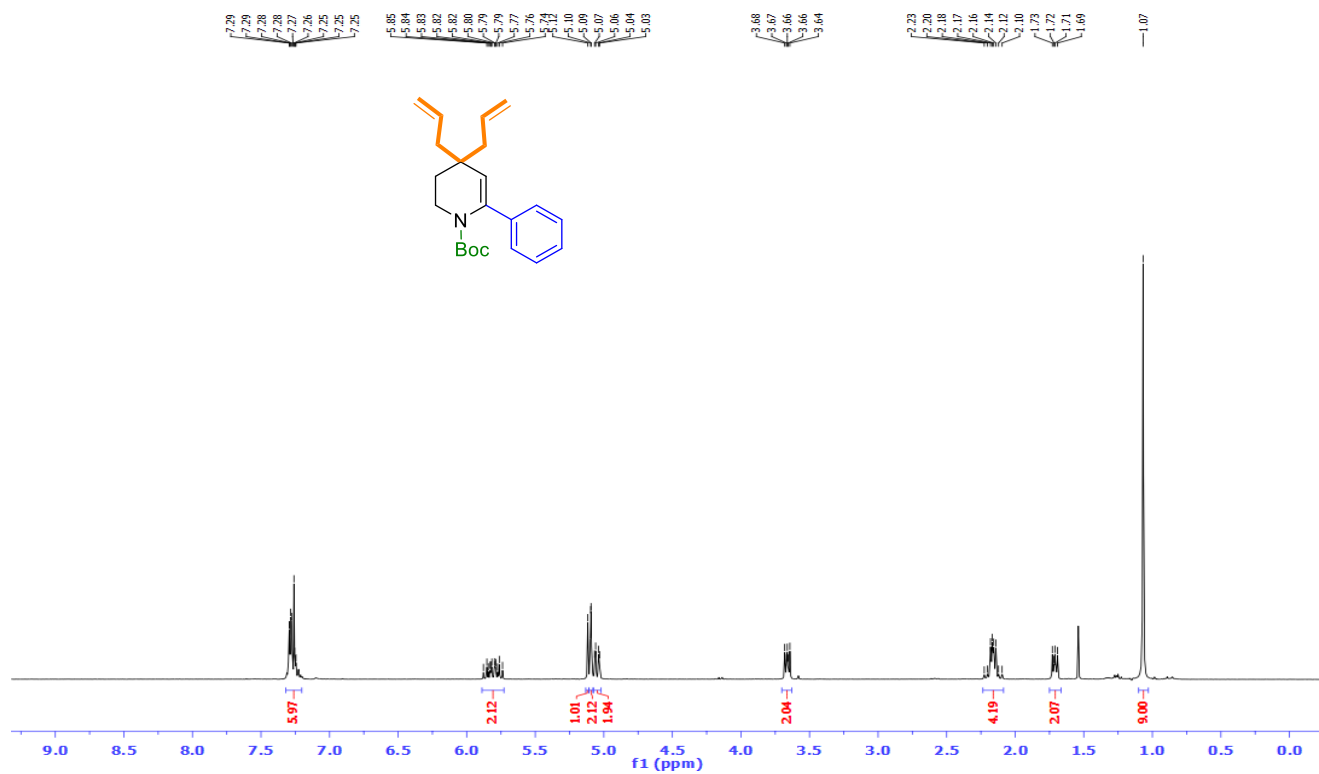

<sup>13</sup>C NMR of **3d** (75 MHz, CDCl<sub>3</sub>)

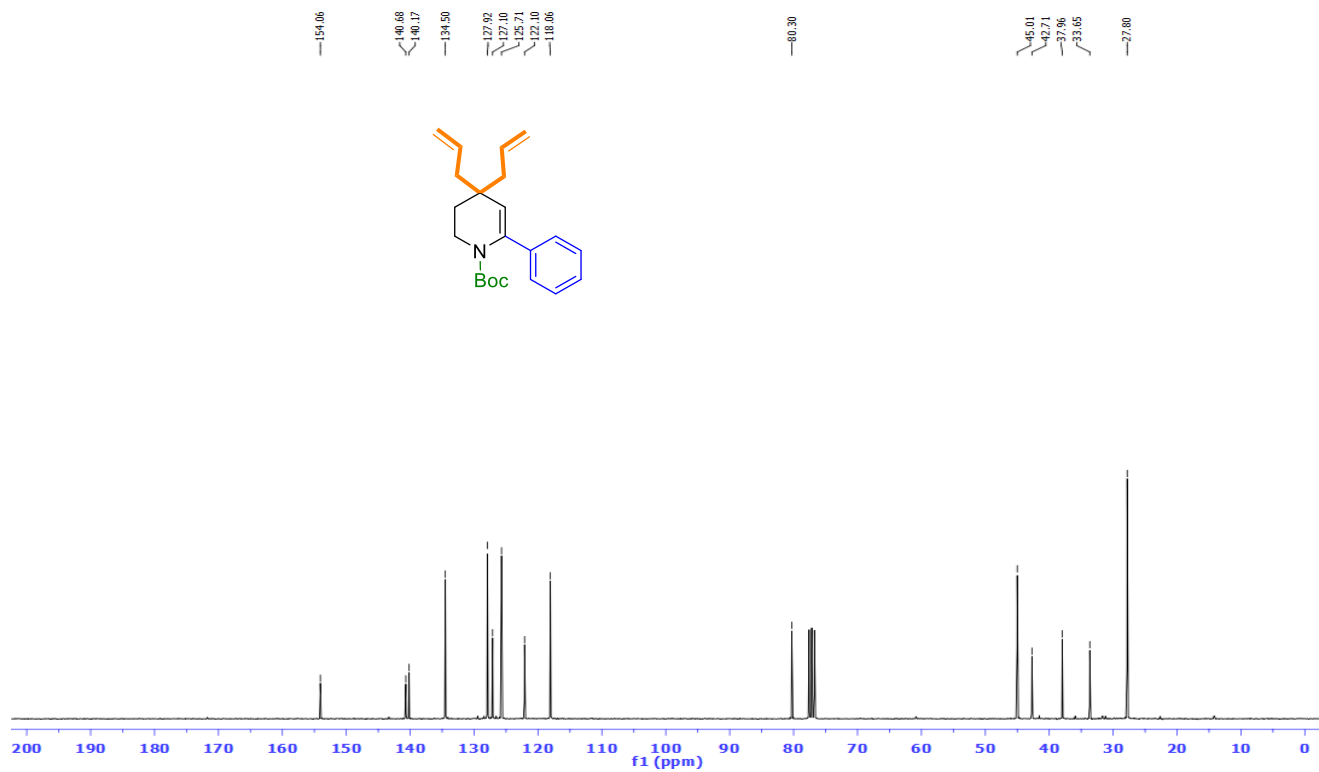

$^1\text{H}$  NMR of **3e** (300 MHz,  $\text{CDCl}_3$ )

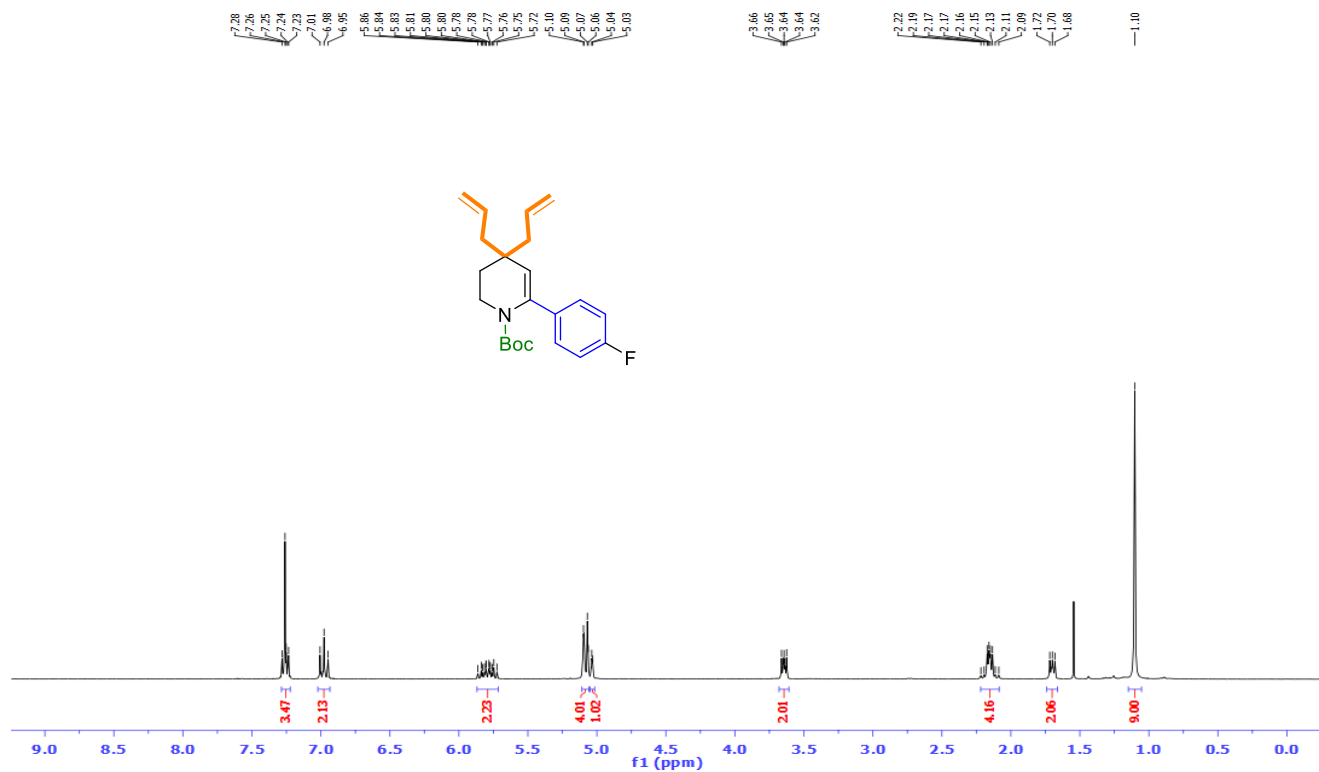

$^{13}\text{C}$  NMR of **3e** (75 MHz,  $\text{CDCl}_3$ )

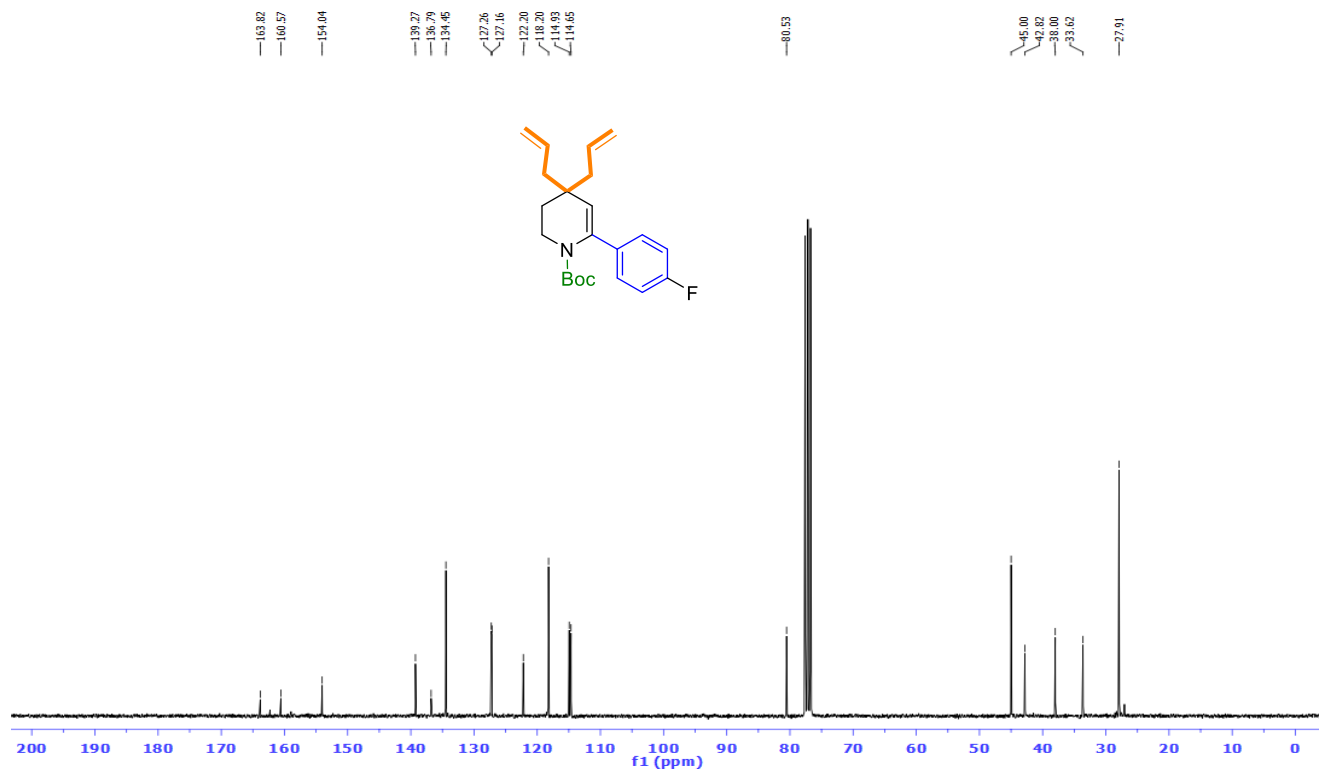

$^1\text{H}$  NMR of **3f** (300 MHz,  $\text{CDCl}_3$ )

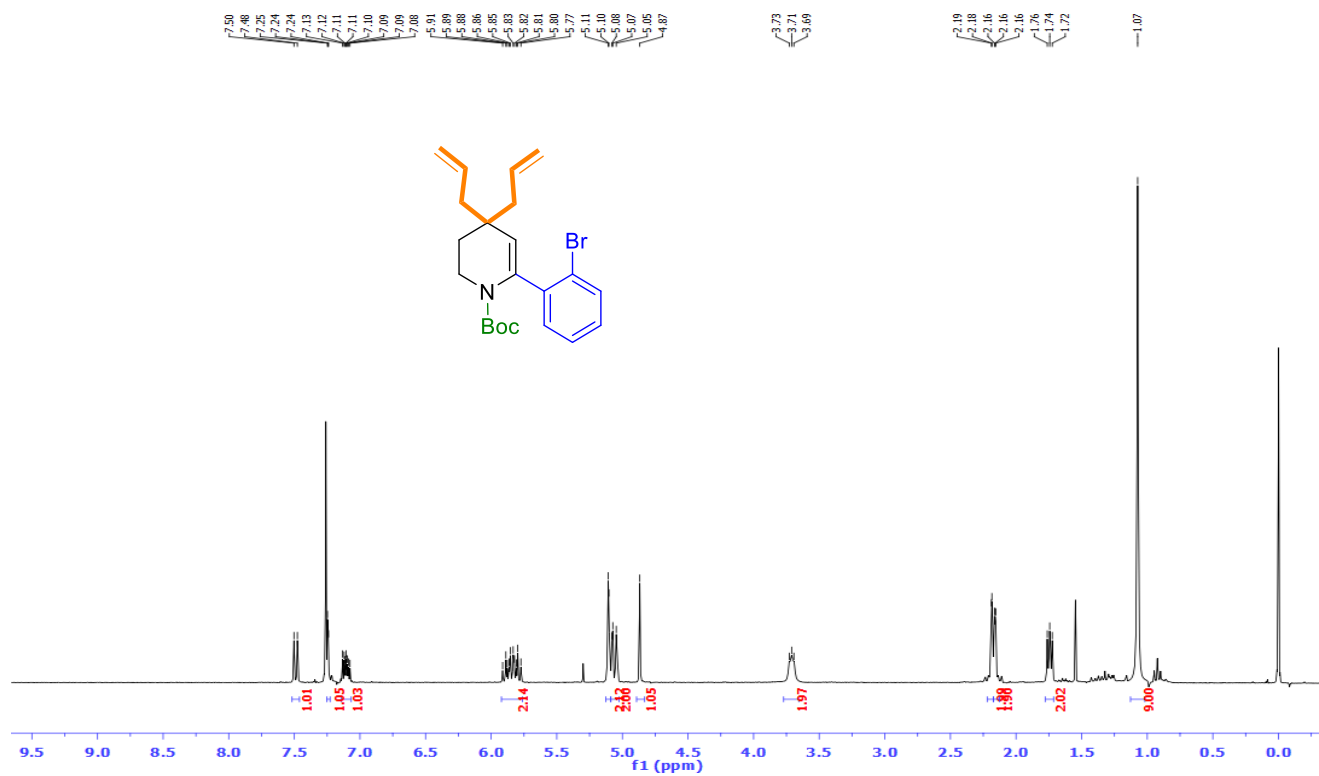

$^{13}\text{C}$  NMR of **3f** (75 MHz,  $\text{CDCl}_3$ )

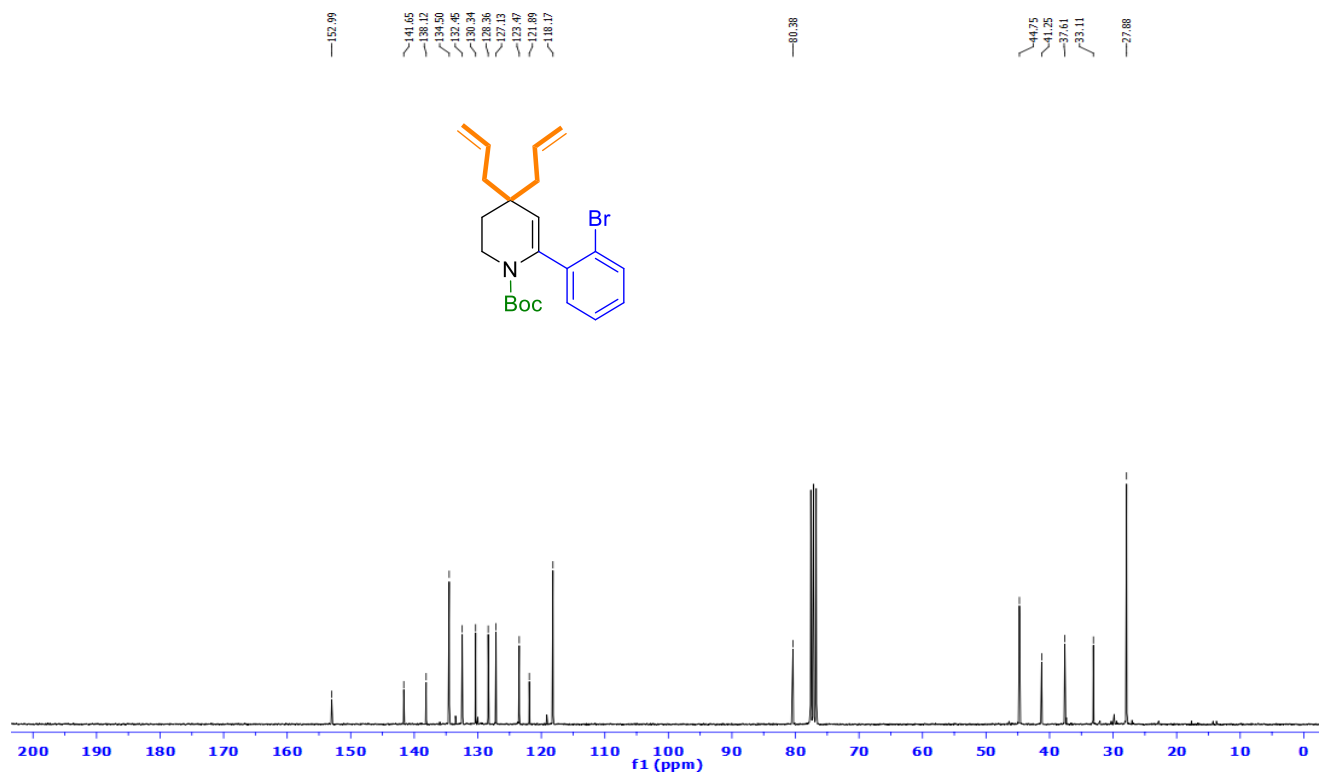



<sup>1</sup>H NMR of **4a** (300 MHz, CDCl<sub>3</sub>)

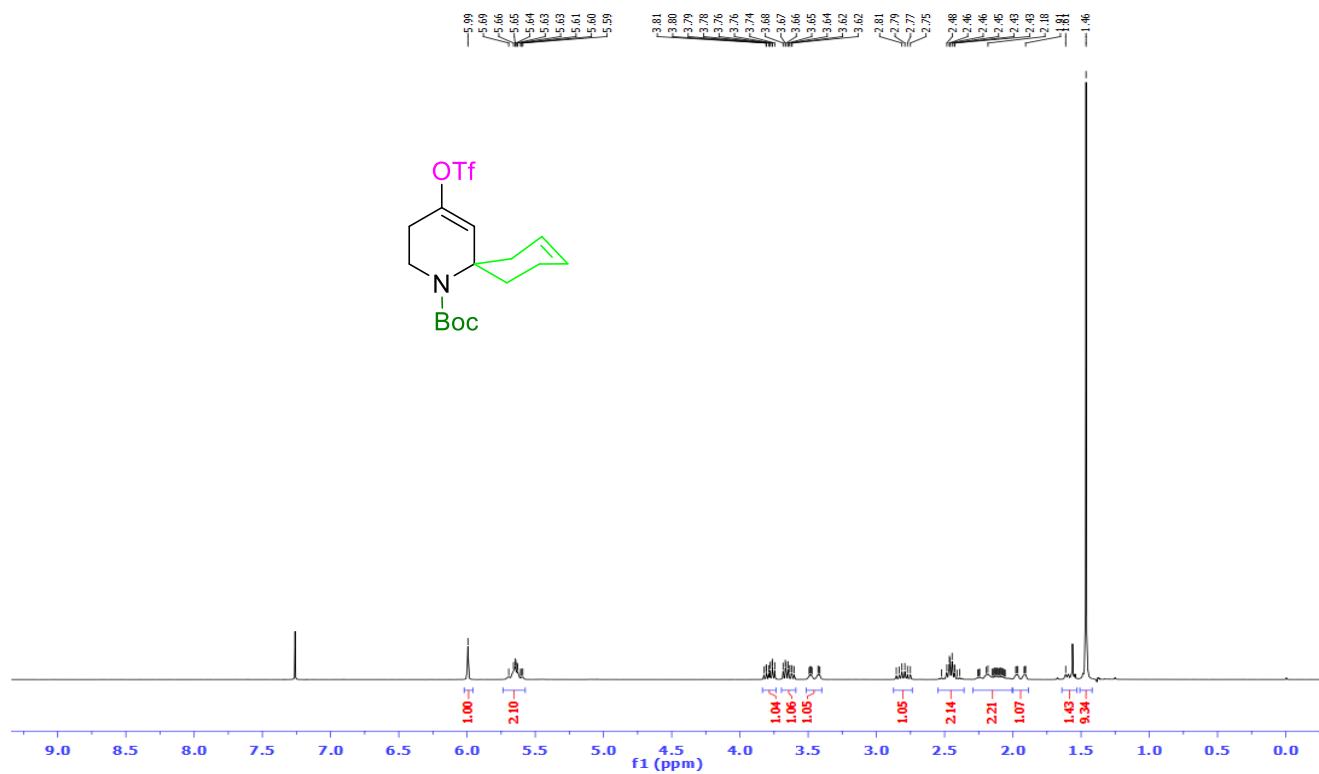

<sup>13</sup>C NMR of **4a** (75 MHz, CDCl<sub>3</sub>)

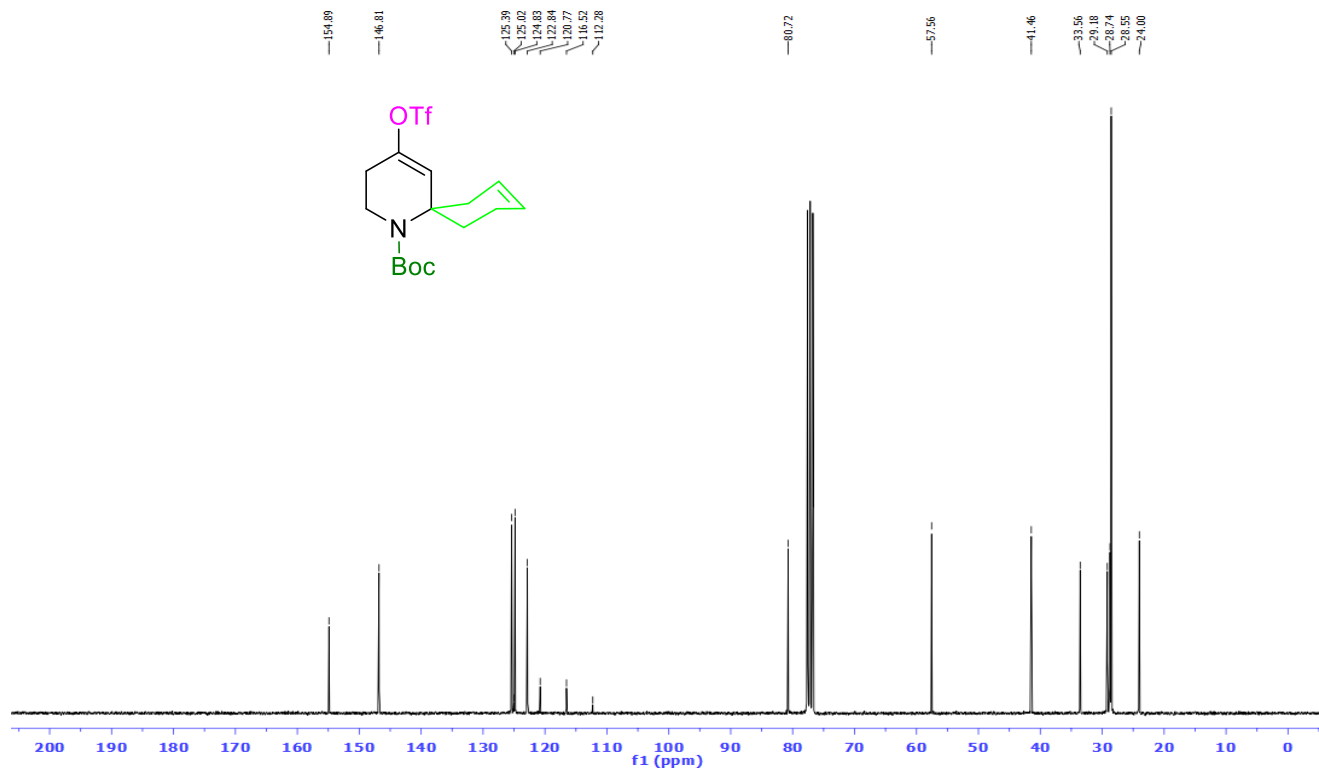

<sup>1</sup>H NMR of **4b** (300 MHz, CDCl<sub>3</sub>)

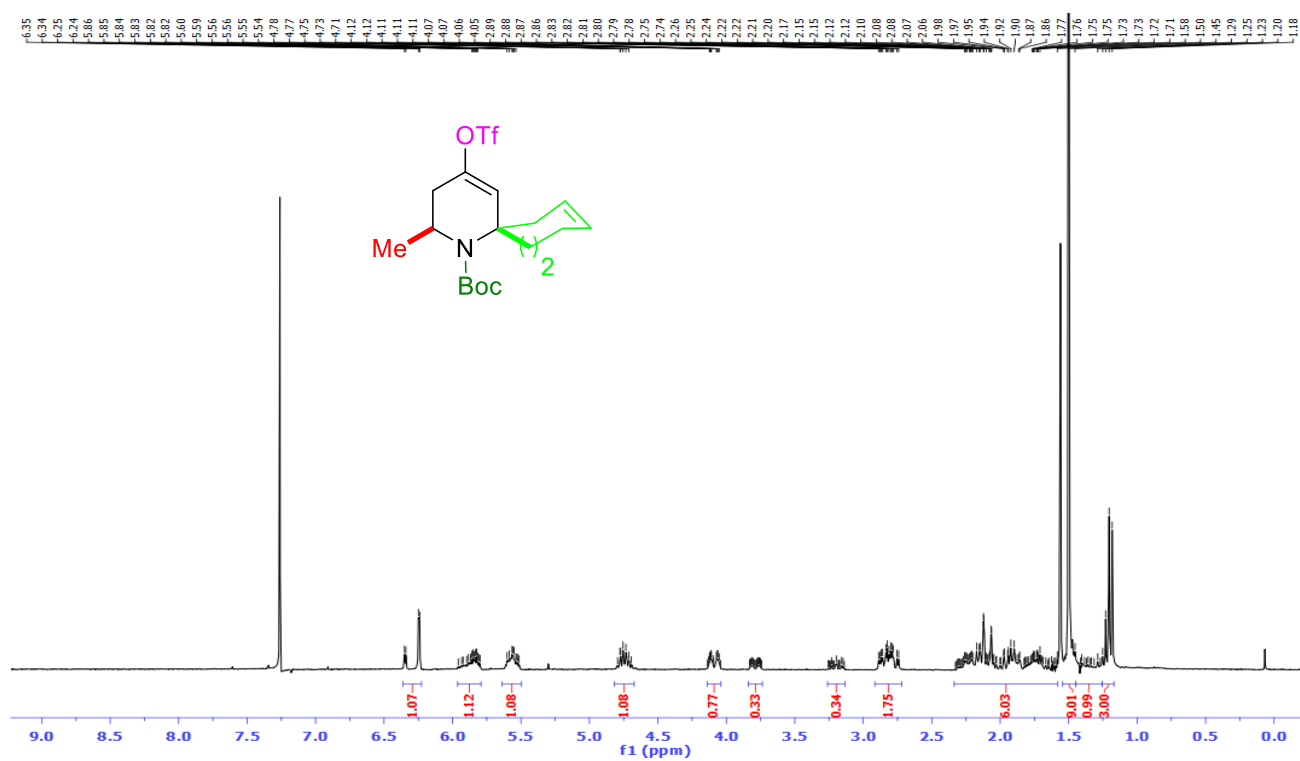

<sup>13</sup>C NMR of **4b** (75 MHz, CDCl<sub>3</sub>)

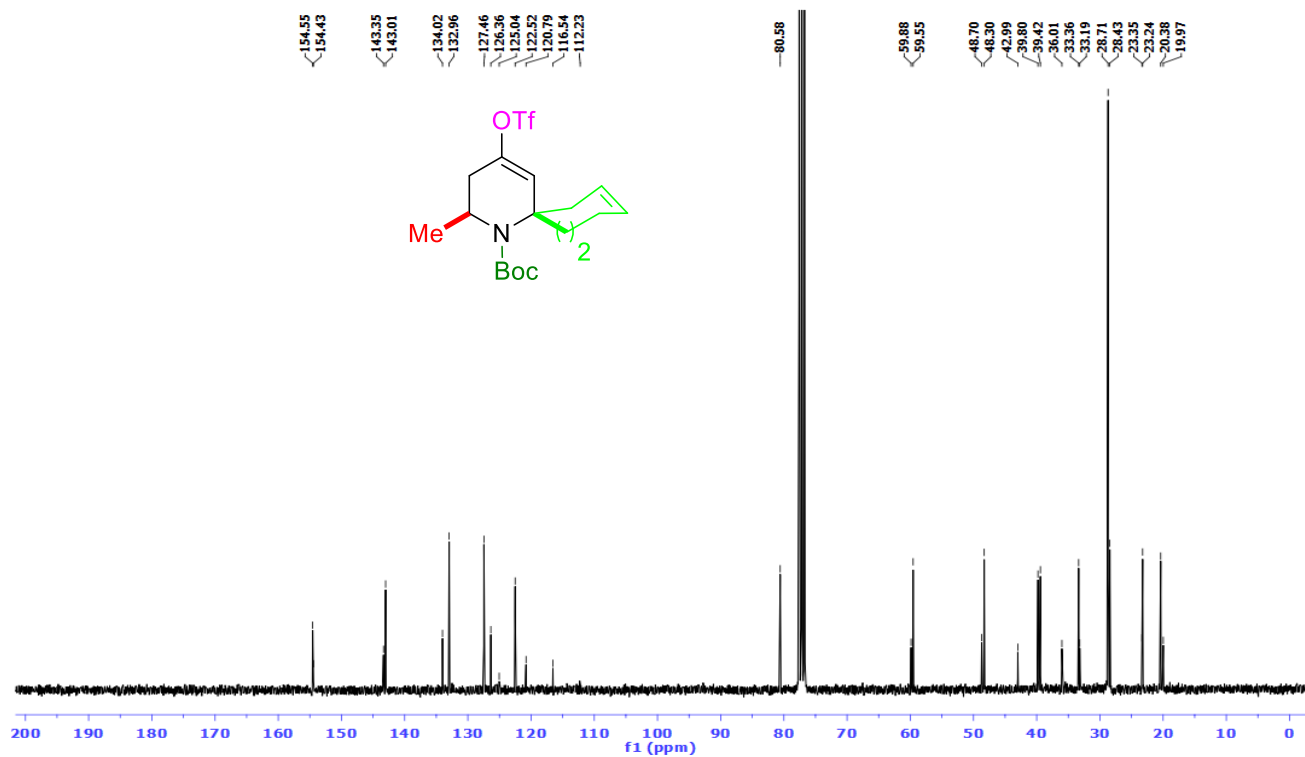

$^1\text{H}$  NMR of **4c** (300 MHz,  $\text{CDCl}_3$ )

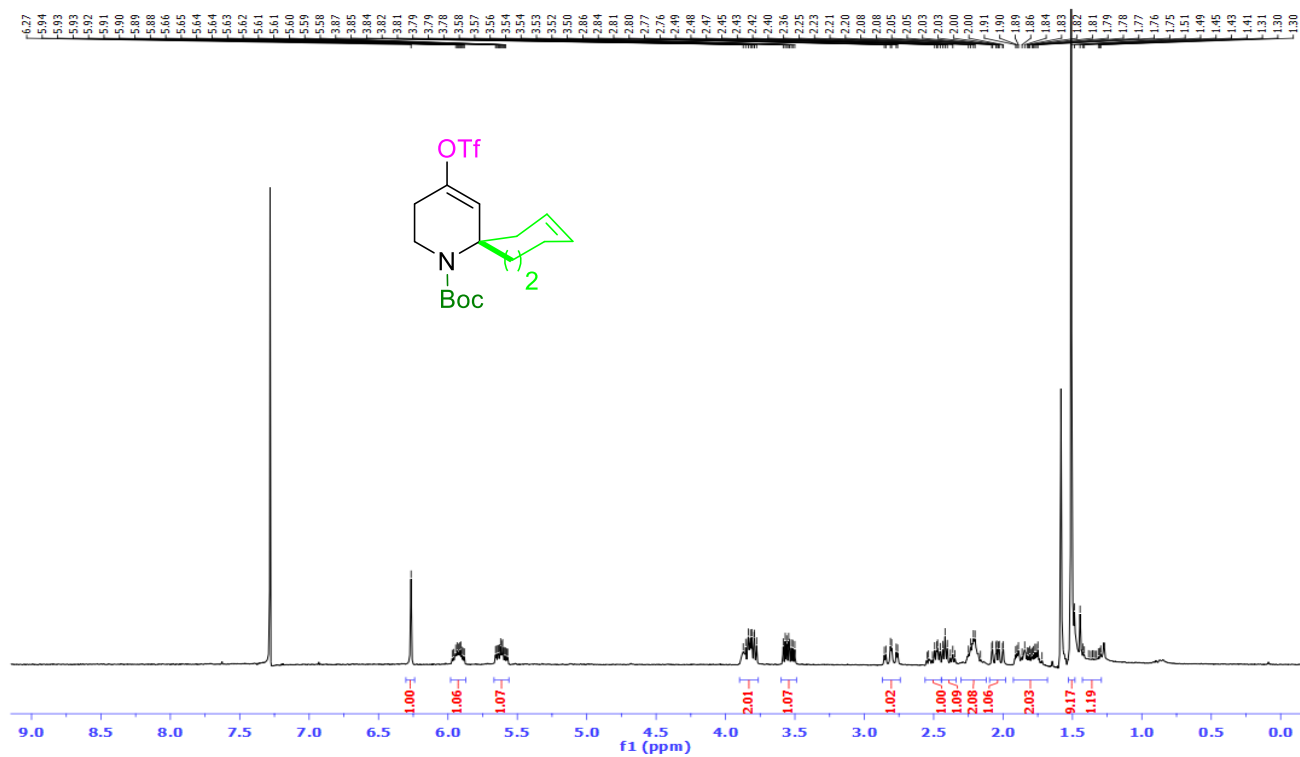

$^{13}\text{C}$  NMR of **4c** (75 MHz,  $\text{CDCl}_3$ )

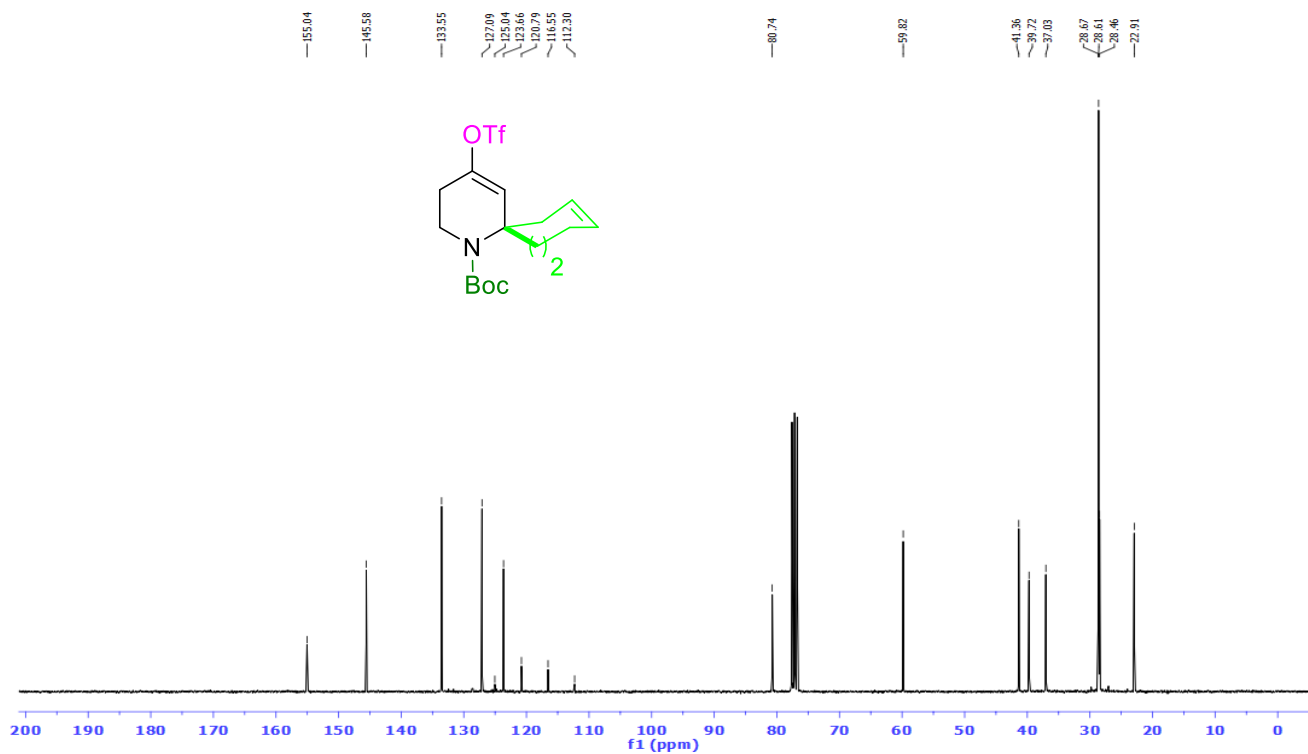

<sup>1</sup>H NMR of **5d** (300 MHz, CDCl<sub>3</sub>)

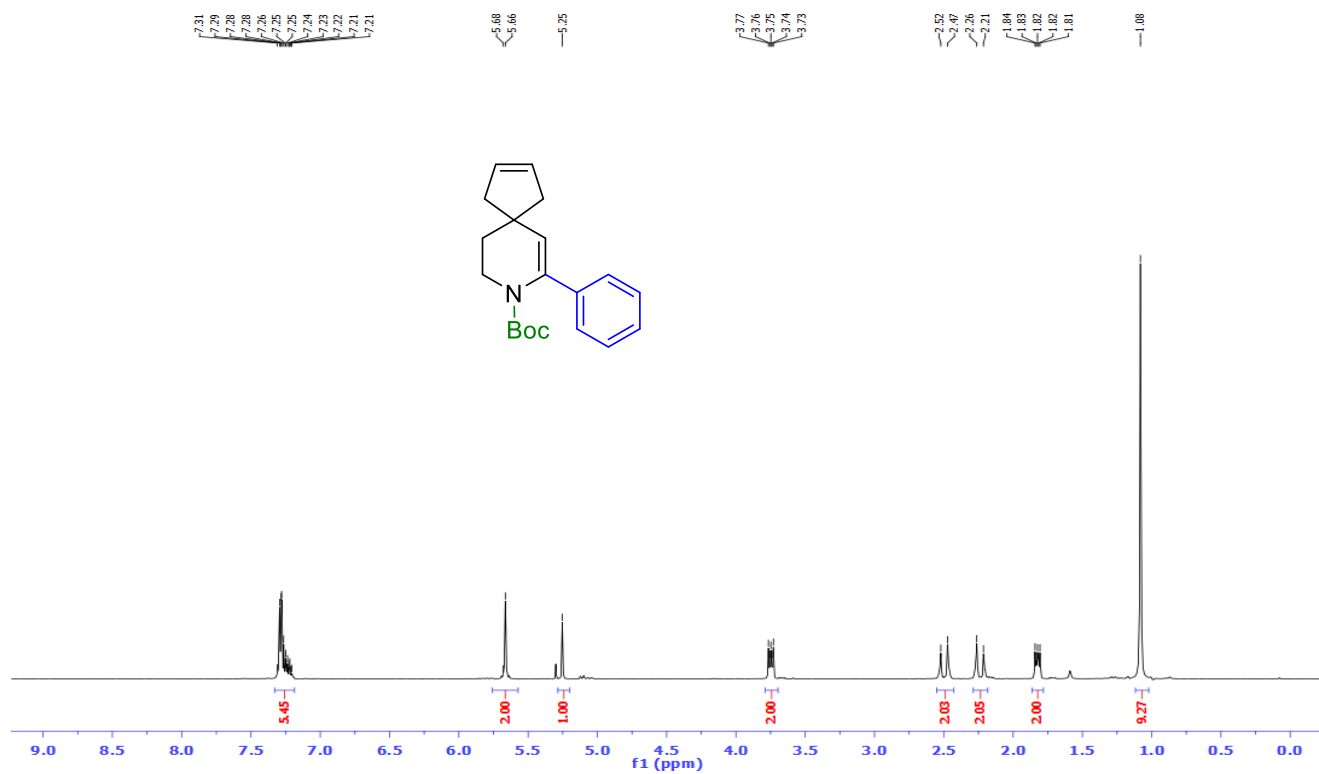

<sup>13</sup>C NMR of **5d** (75 MHz, CDCl<sub>3</sub>)

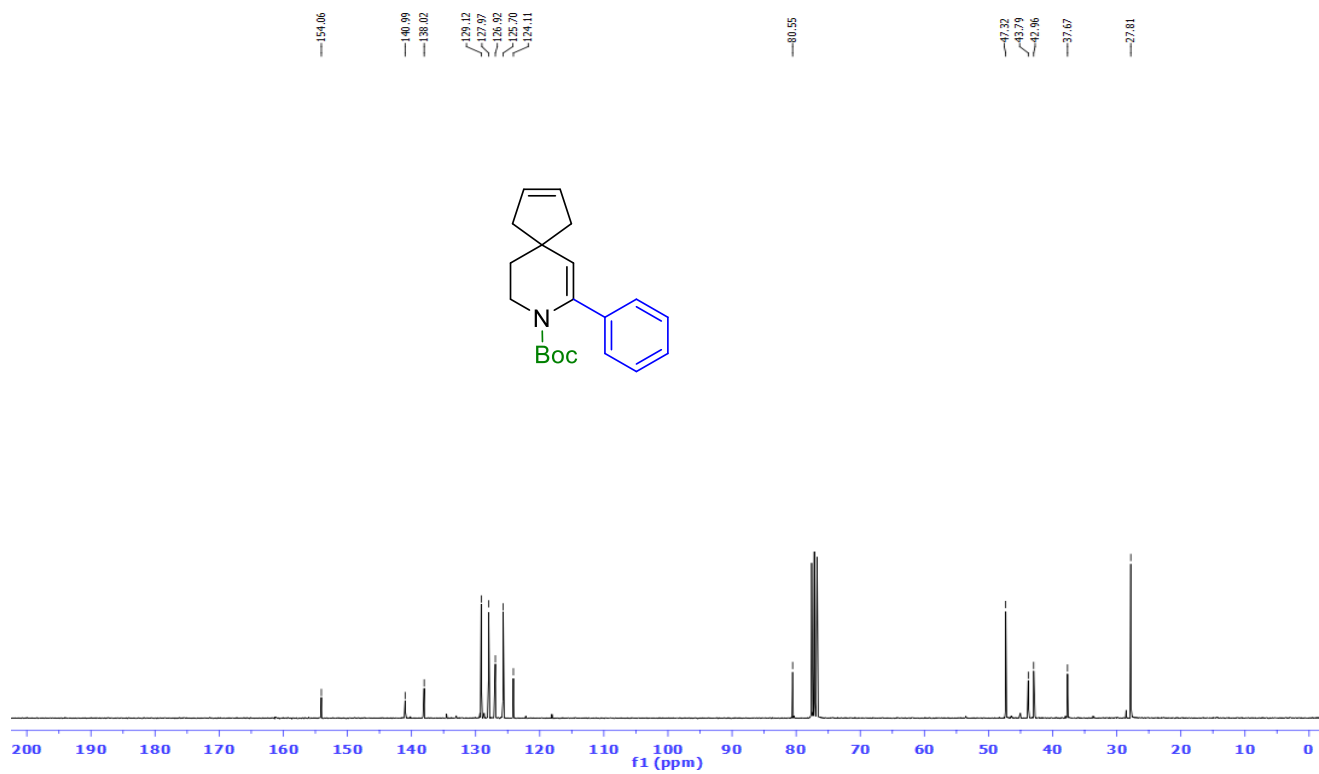

$^1\text{H}$  NMR of **5e** (300 MHz,  $\text{CDCl}_3$ )

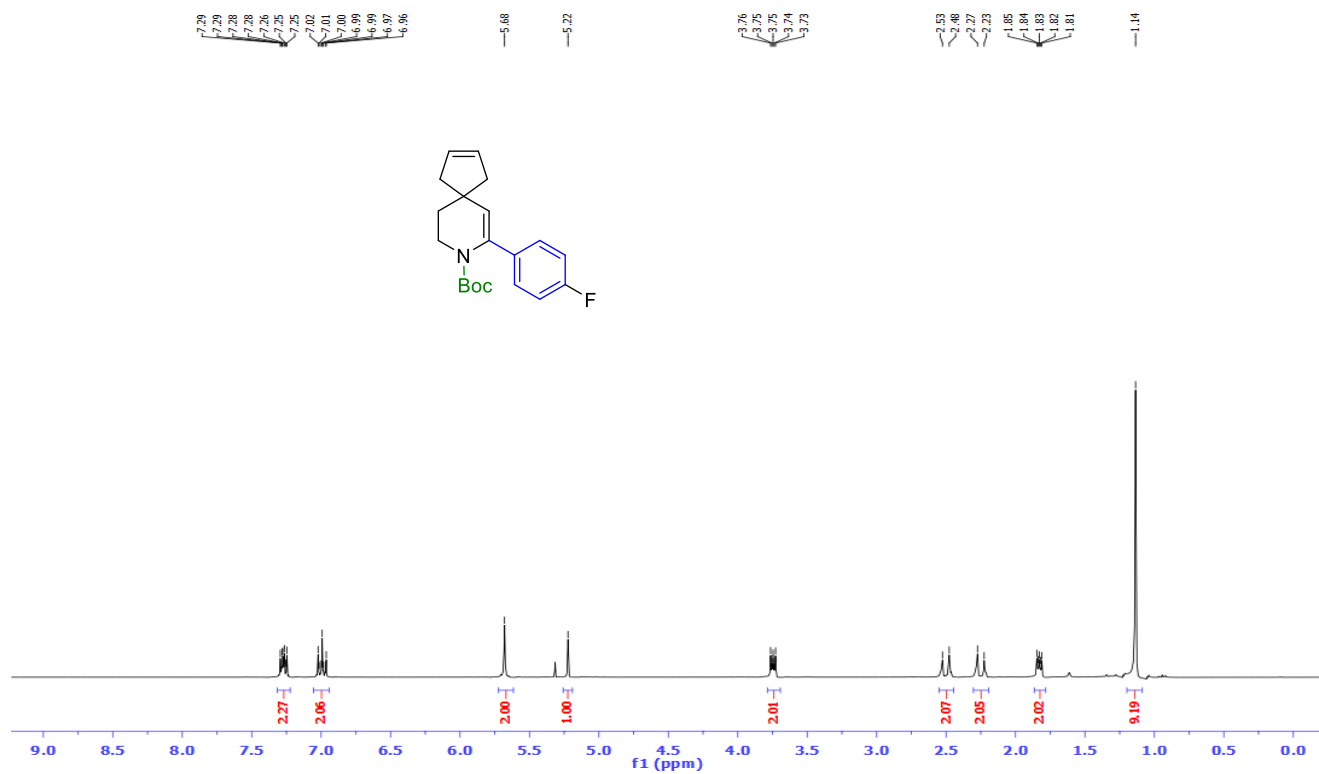

$^{13}\text{C}$  NMR of **5e** (75 MHz,  $\text{CDCl}_3$ )

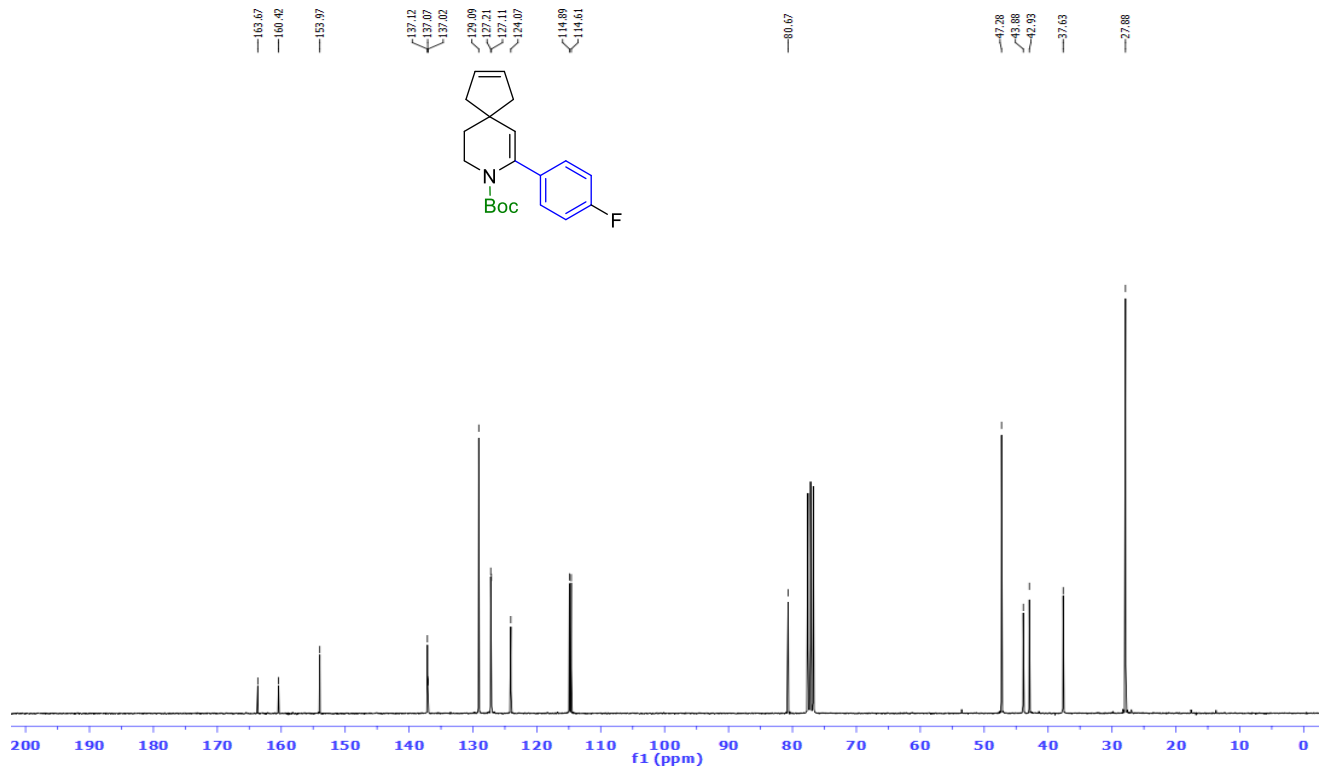

$^1\text{H}$  NMR of **5f** (300 MHz,  $\text{CDCl}_3$ )

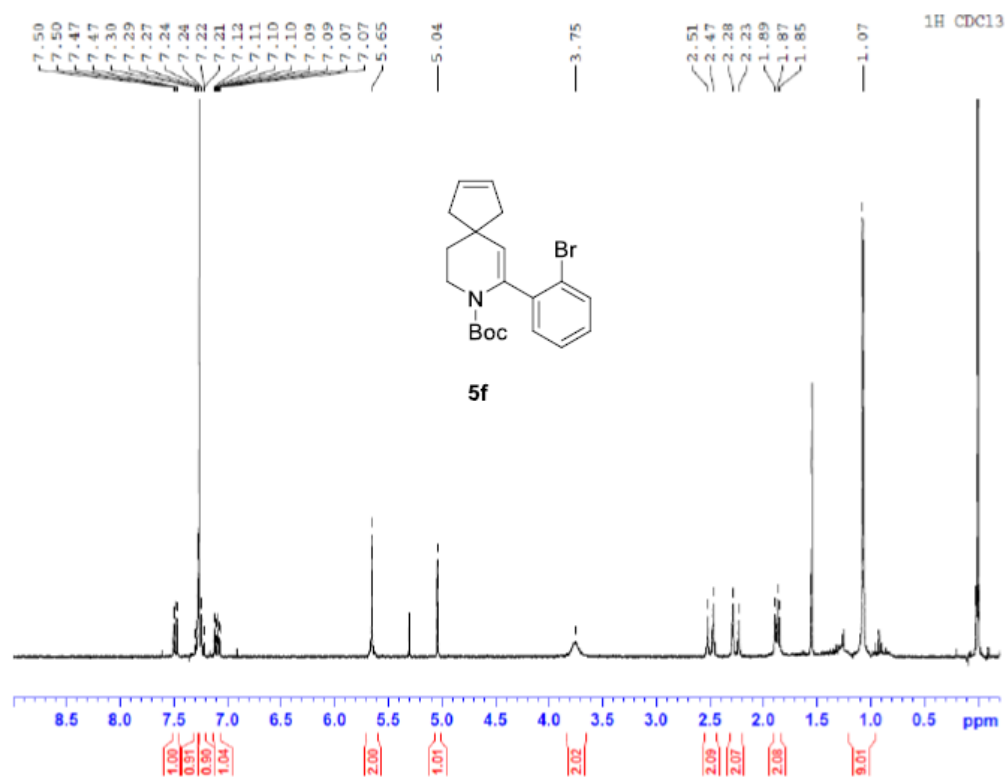

$^{13}\text{C}$  NMR of **5f** (75 MHz,  $\text{CDCl}_3$ )

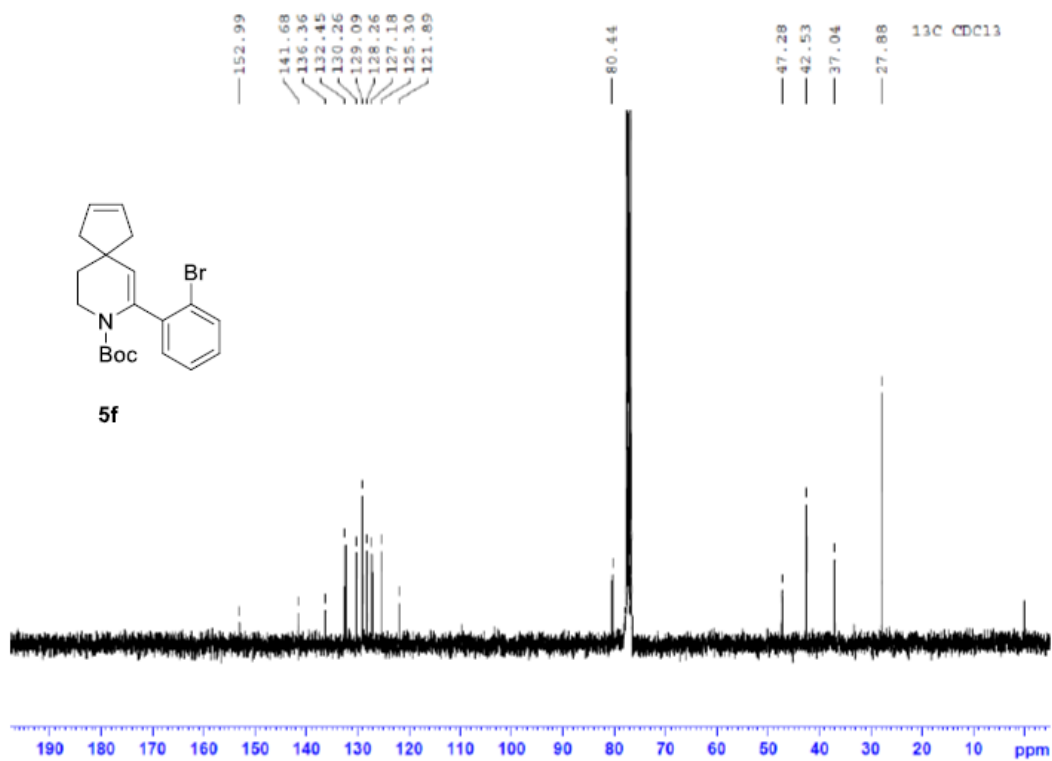

$^1\text{H}$  NMR of **6a** (300 MHz,  $\text{CDCl}_3$ )

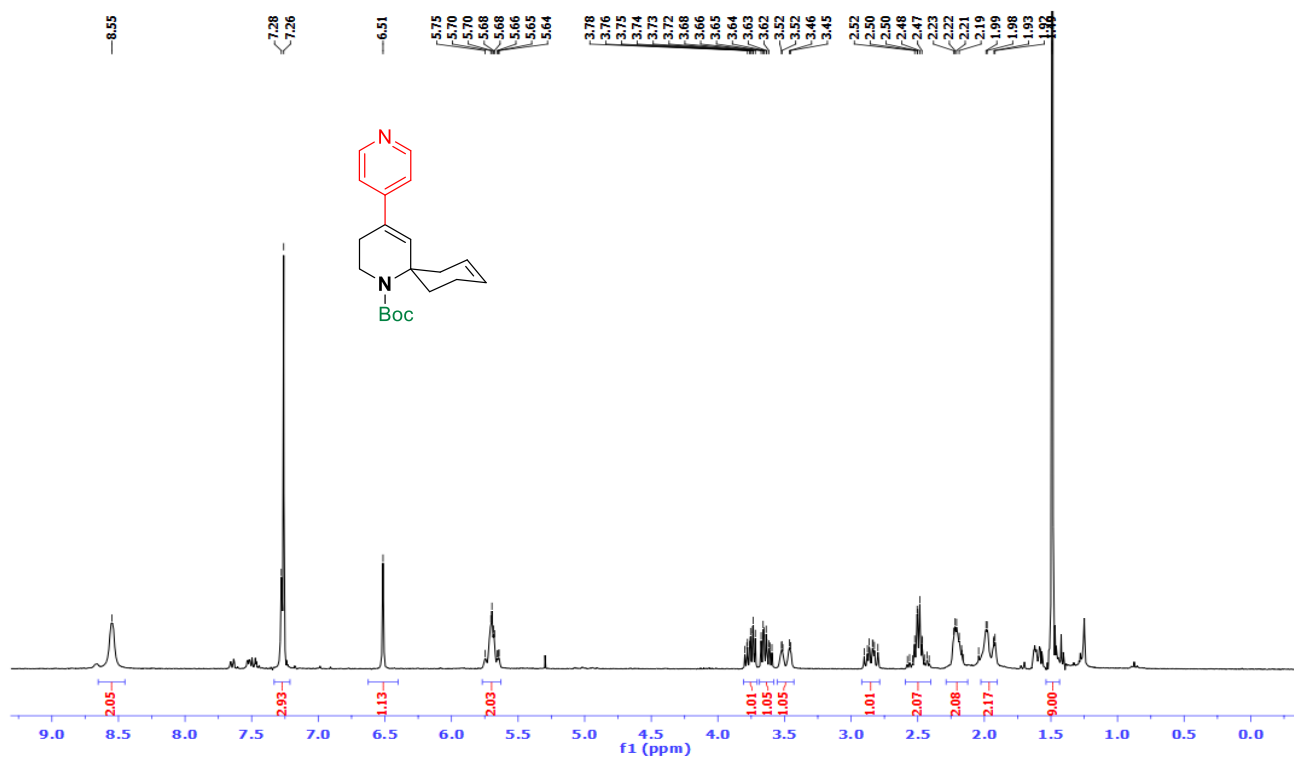

$^{13}\text{C}$  NMR of **6a** (75 MHz,  $\text{CDCl}_3$ )

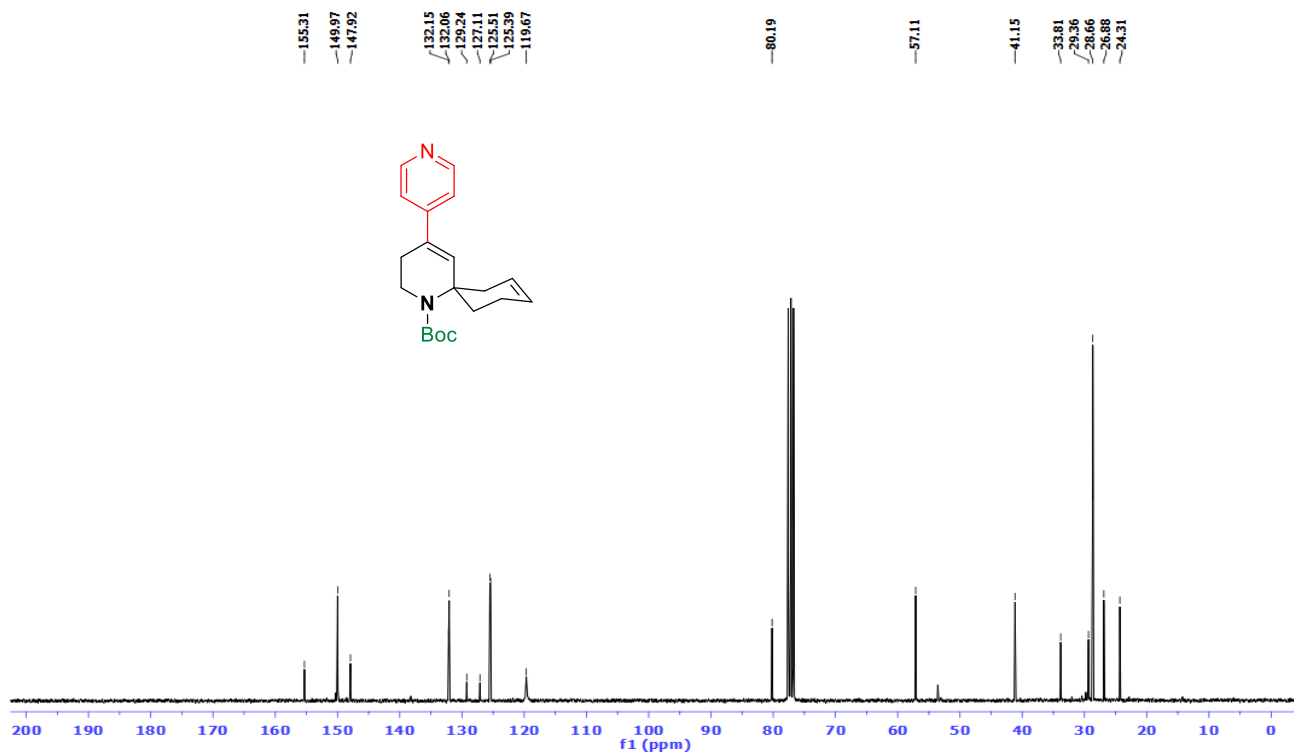

$^1\text{H}$  NMR of **6b** (300 MHz,  $\text{CDCl}_3$ )

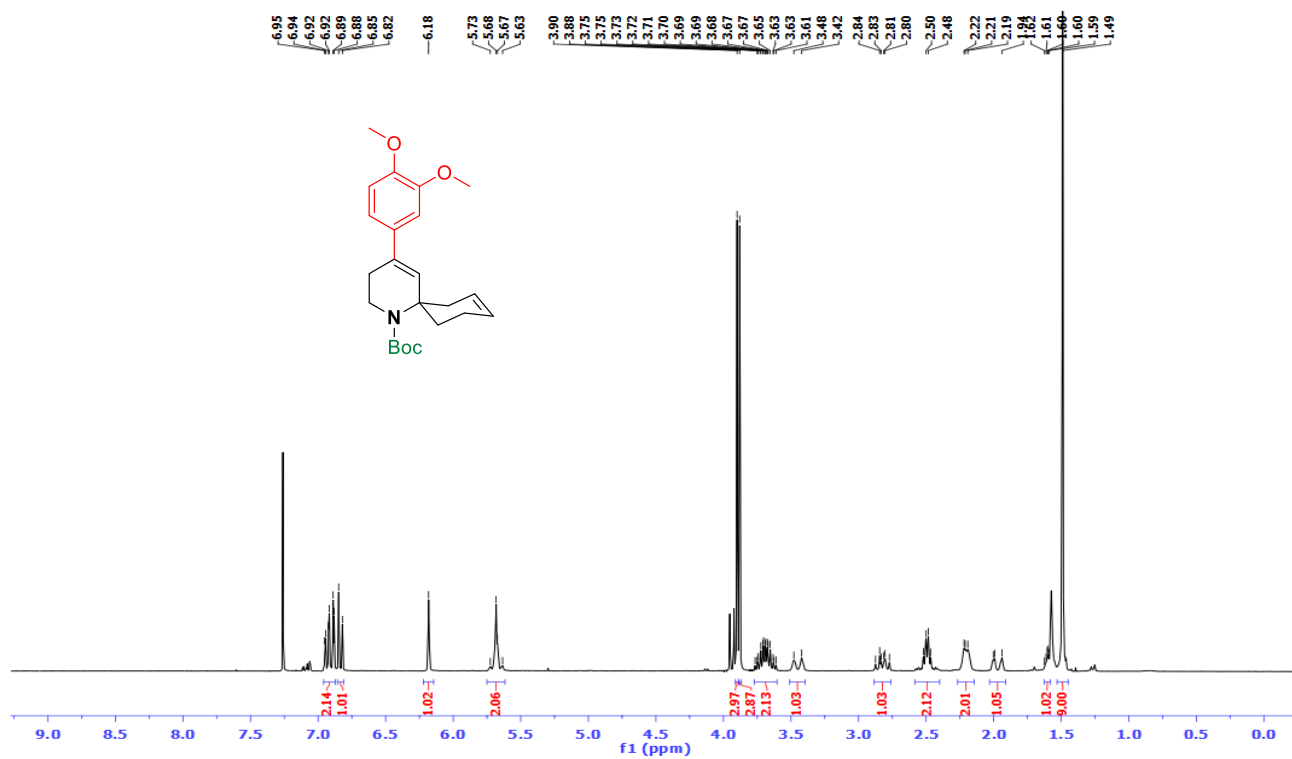

$^{13}\text{C}$  NMR of **6b** (75 MHz,  $\text{CDCl}_3$ )

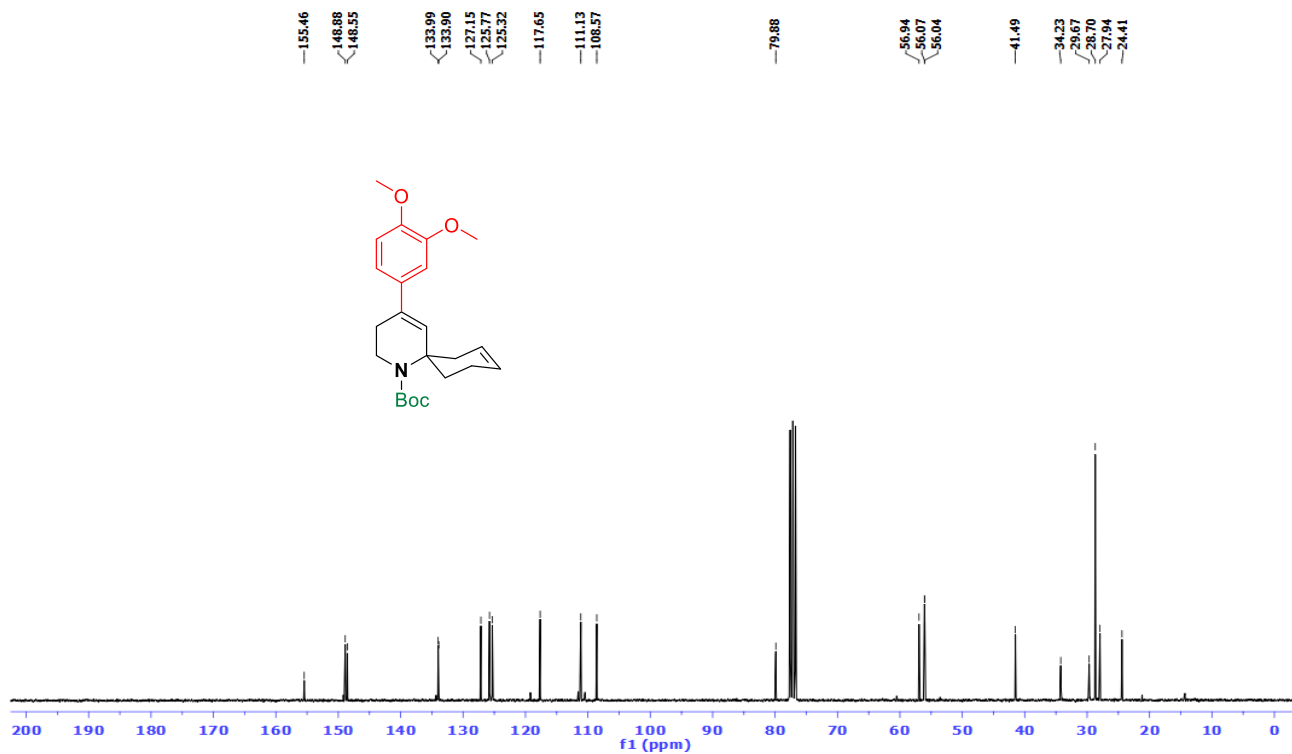



$^1\text{H}$  NMR of **6c** (300 MHz,  $\text{CDCl}_3$ )

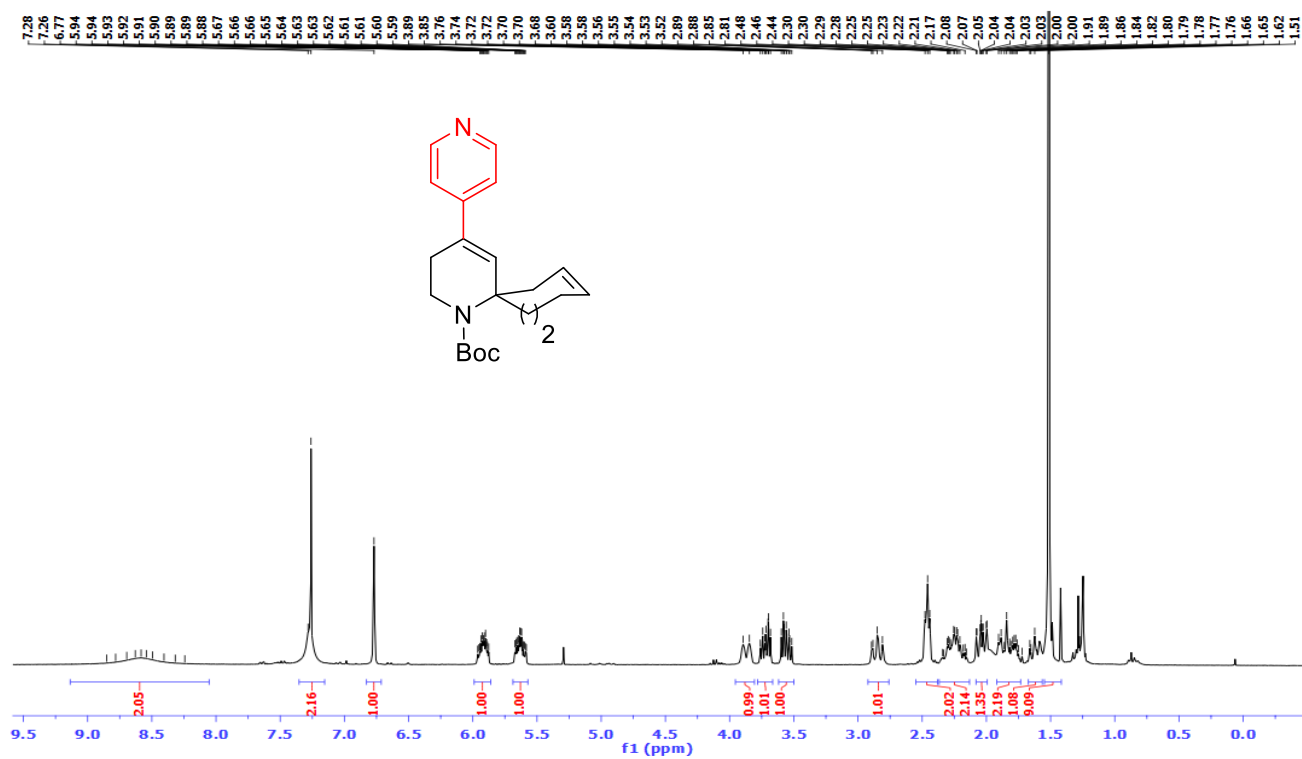

$^{13}\text{C}$  NMR of **6c** (75 MHz,  $\text{CDCl}_3$ )

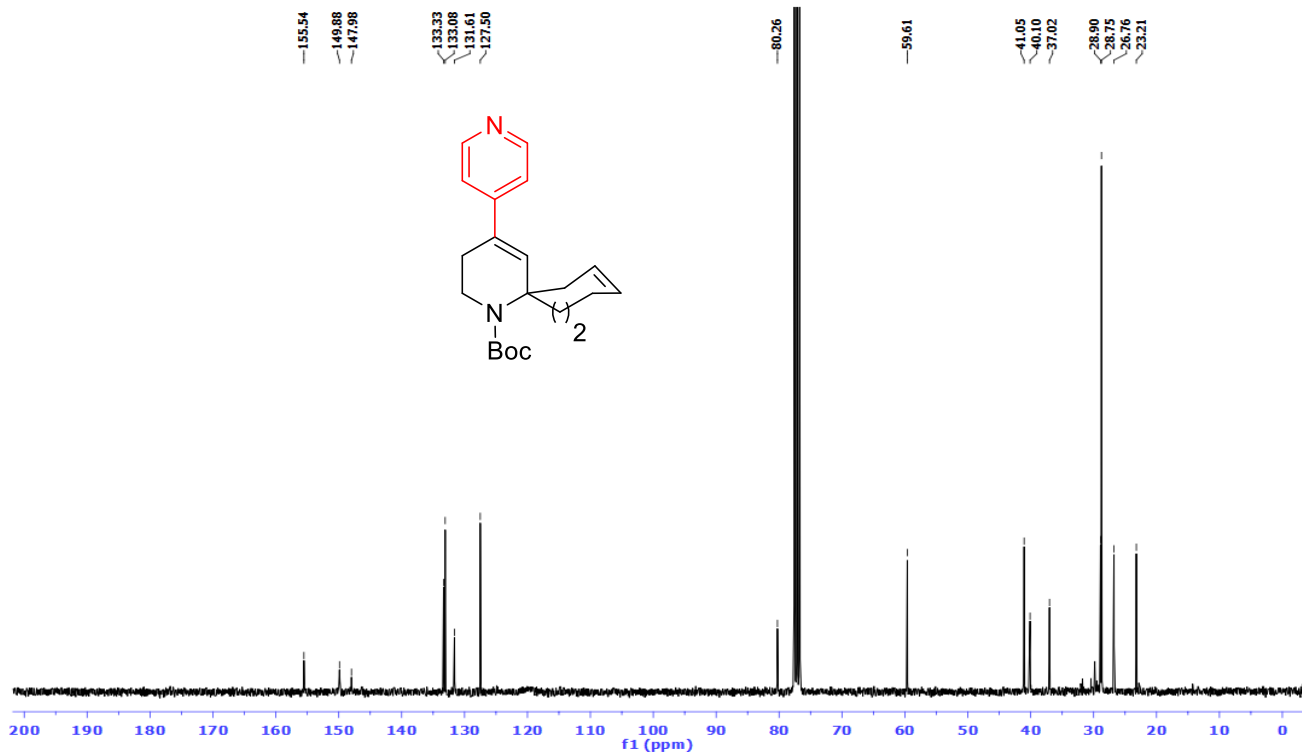

<sup>1</sup>H NMR of **6d** (300 MHz, CDCl<sub>3</sub>)

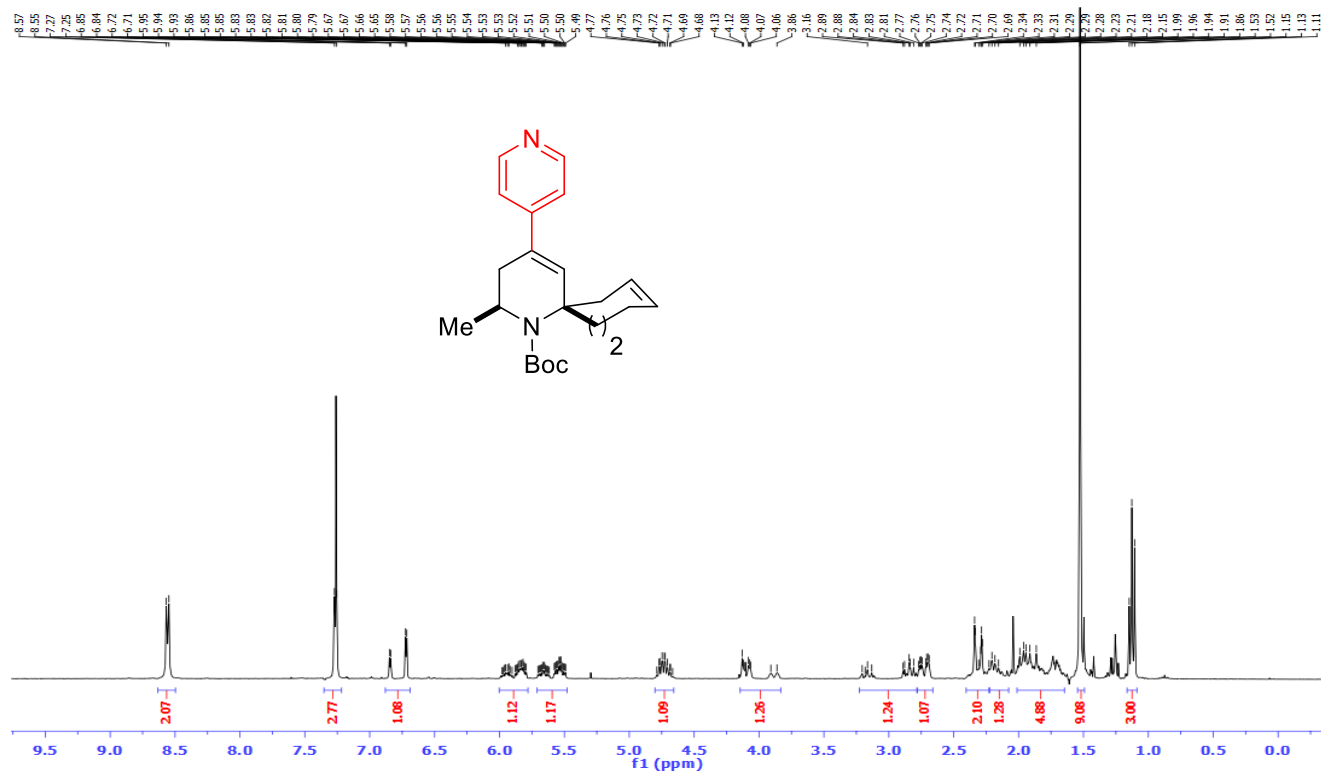

<sup>13</sup>C NMR of **6d** (75 MHz, CDCl<sub>3</sub>)

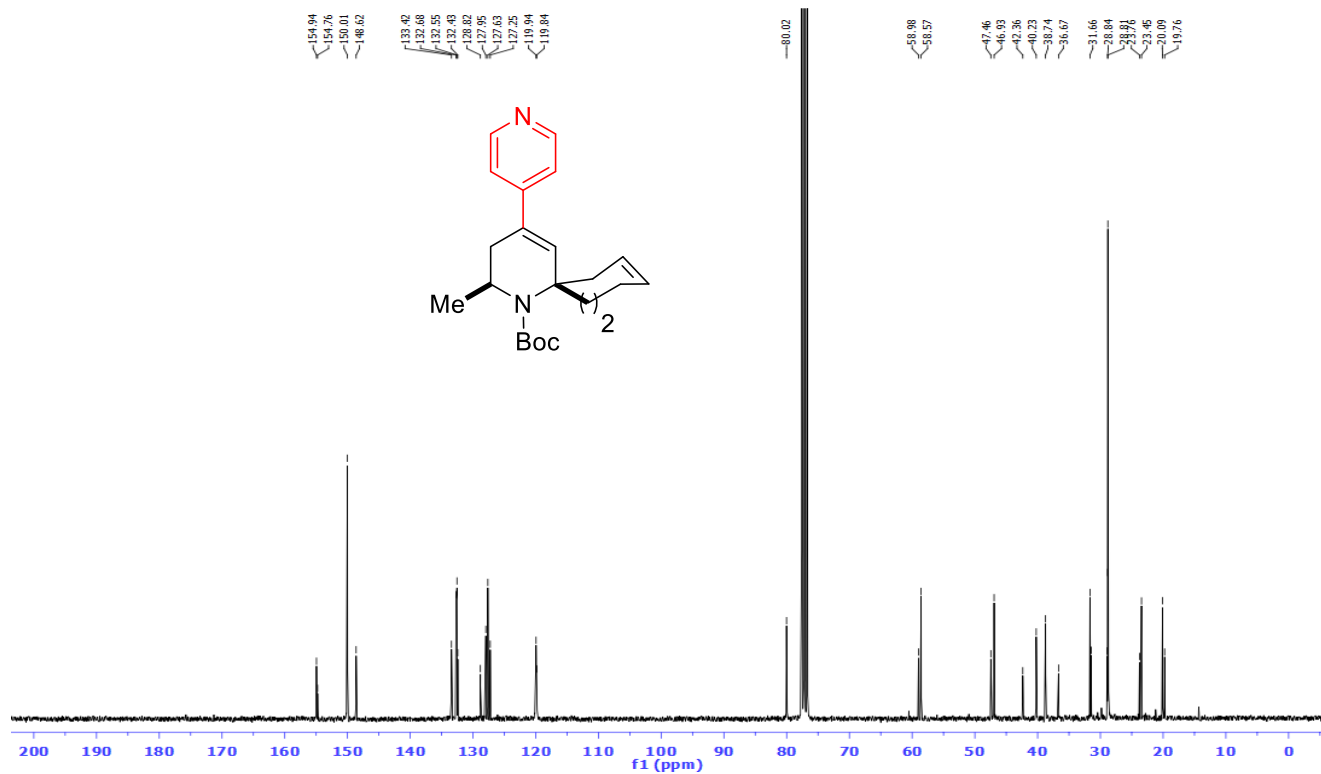

$^1\text{H}$  NMR of **7a** (300 MHz,  $\text{CDCl}_3$ )

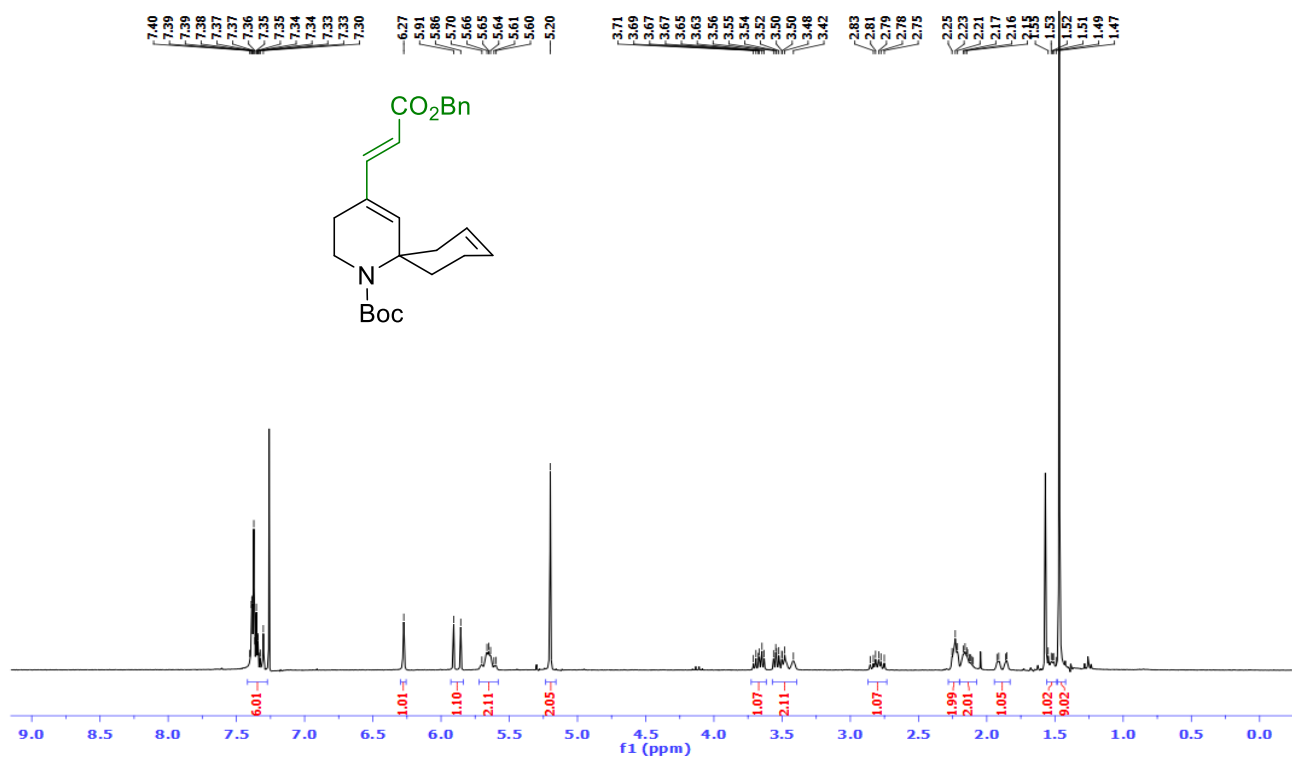

$^{13}\text{C}$  NMR of **7a** (75 MHz,  $\text{CDCl}_3$ )

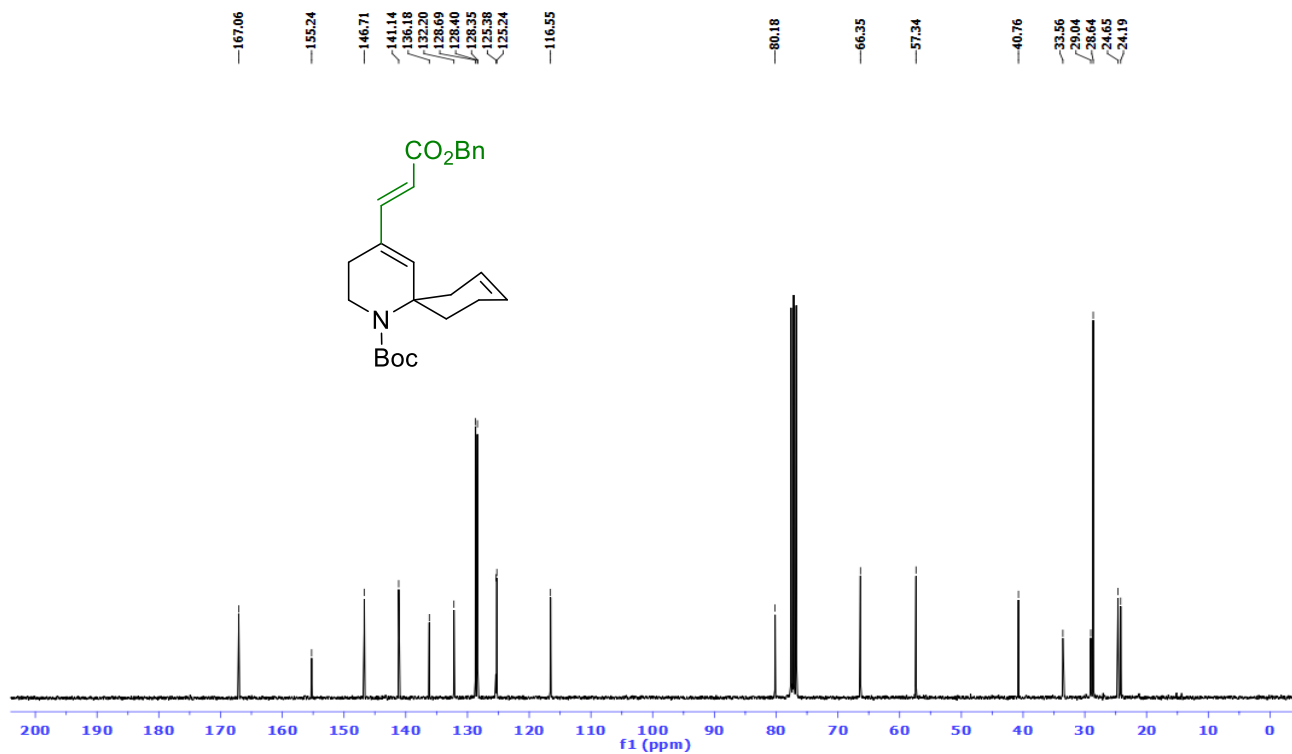

<sup>1</sup>H NMR of **7b** (300 MHz, CDCl<sub>3</sub>)

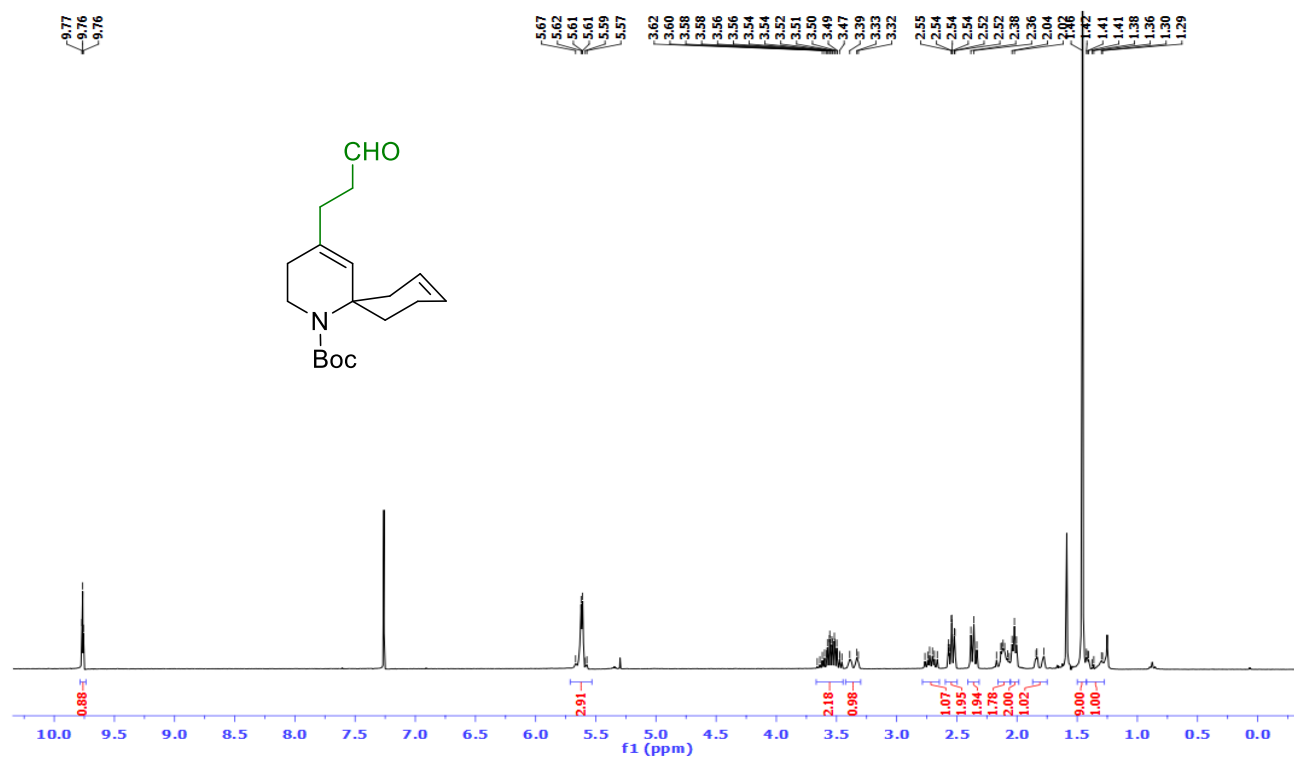

<sup>13</sup>C NMR of **7b** (75 MHz, CDCl<sub>3</sub>)

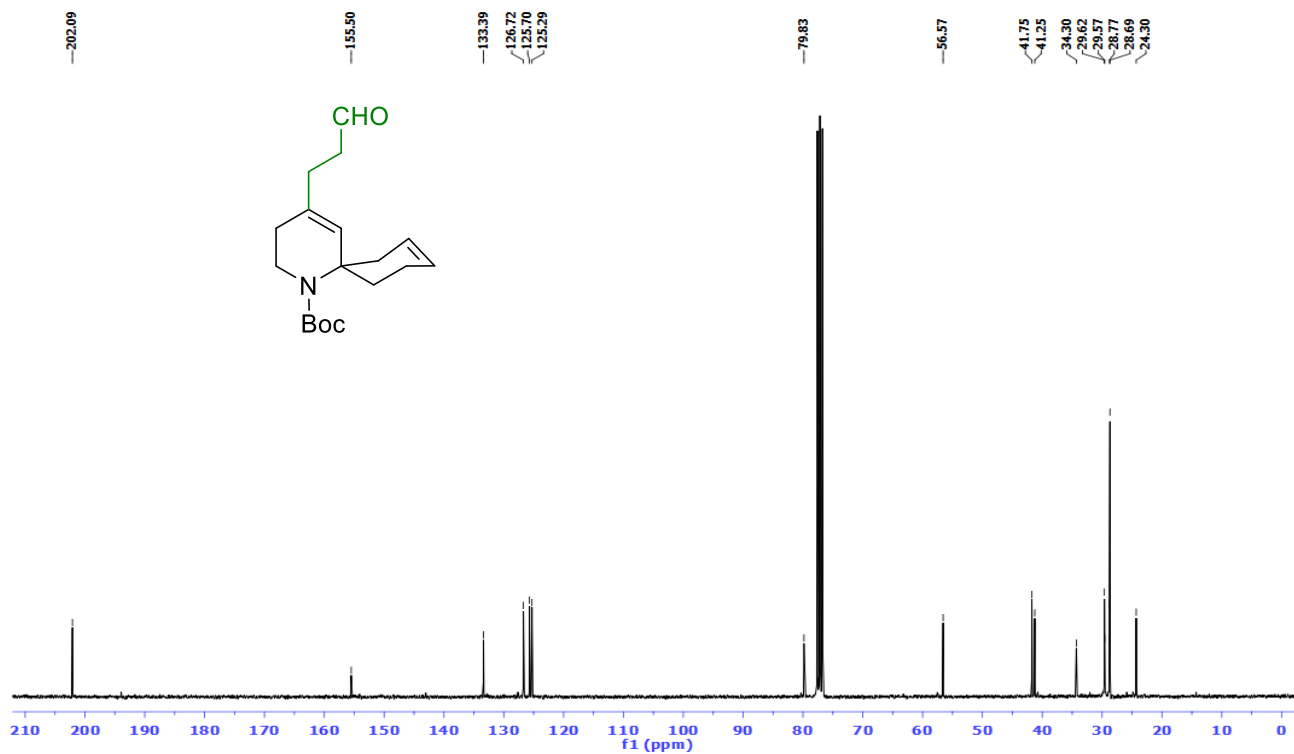

<sup>1</sup>H NMR of **8a** (300 MHz, CDCl<sub>3</sub>)

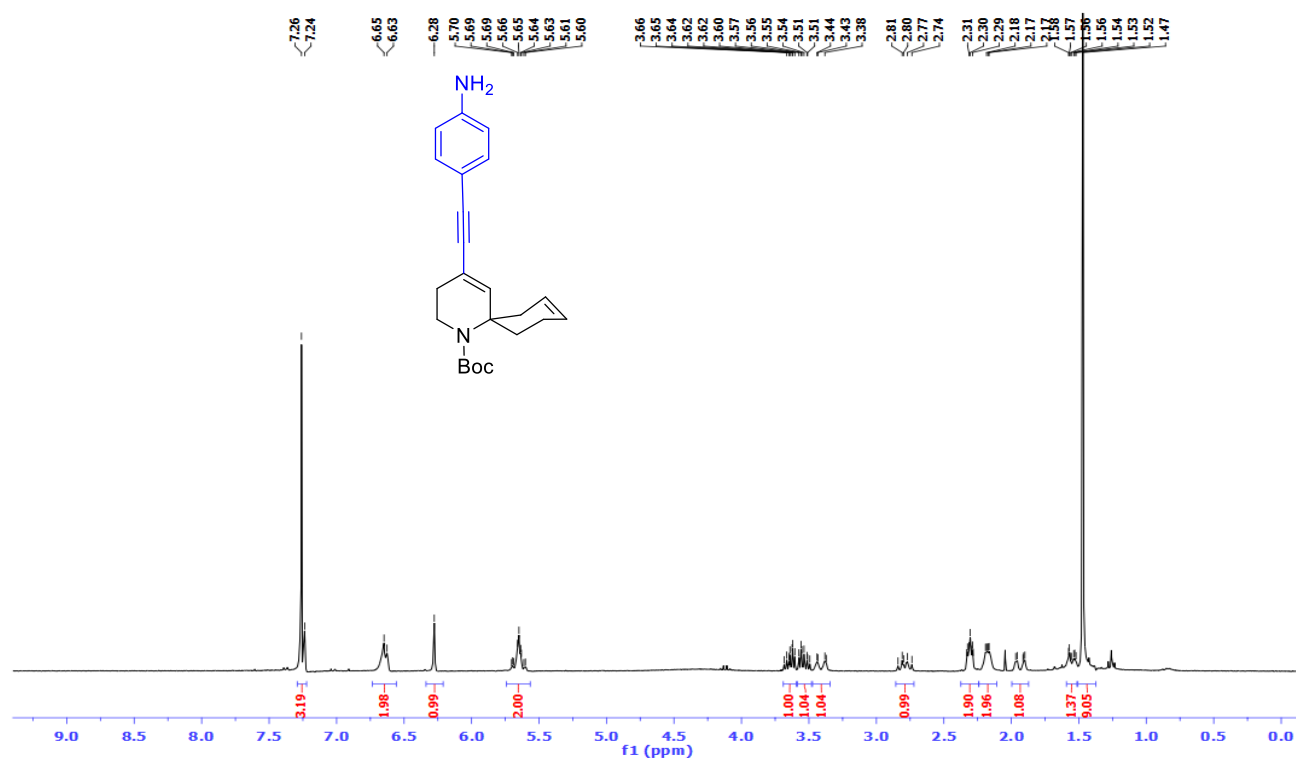

<sup>13</sup>C NMR of **8a** (75 MHz, CDCl<sub>3</sub>)

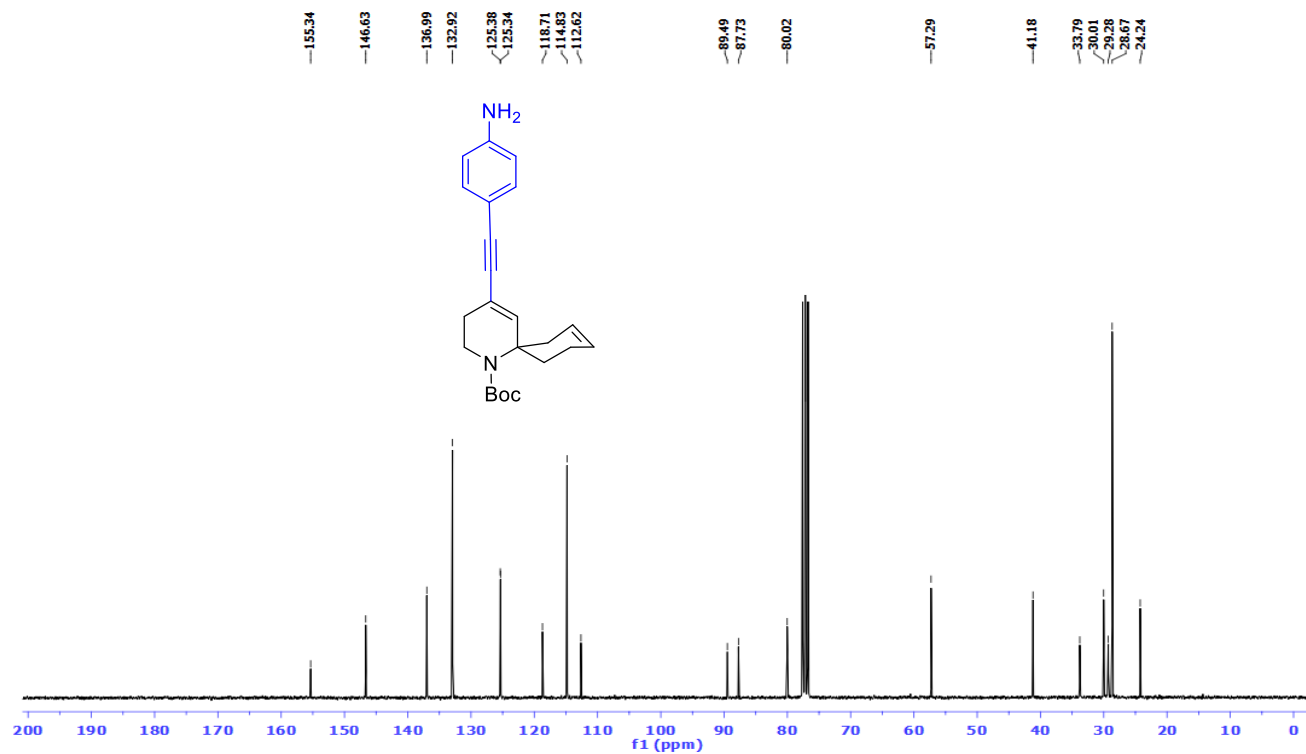

$^1\text{H}$  NMR of **8b** (300 MHz,  $\text{CDCl}_3$ )

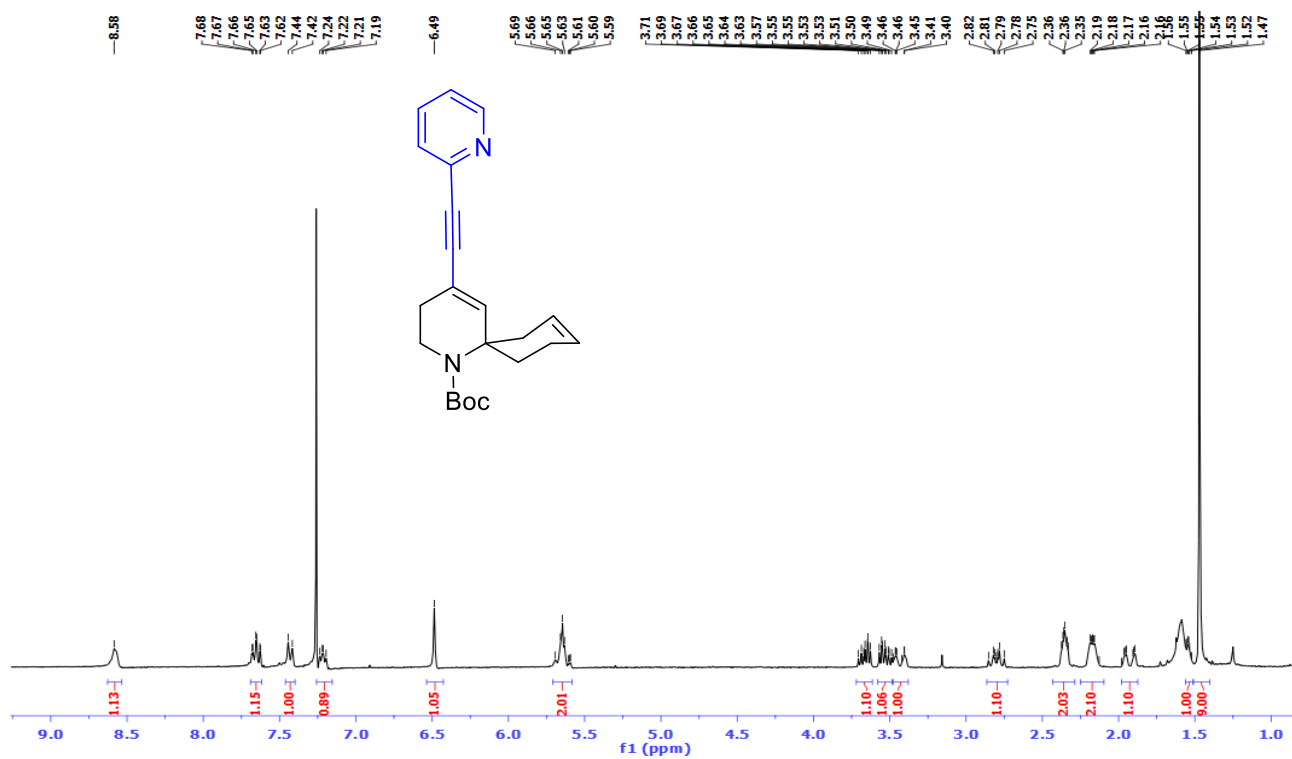

$^{13}\text{C}$  NMR of **8b** (75 MHz,  $\text{CDCl}_3$ )

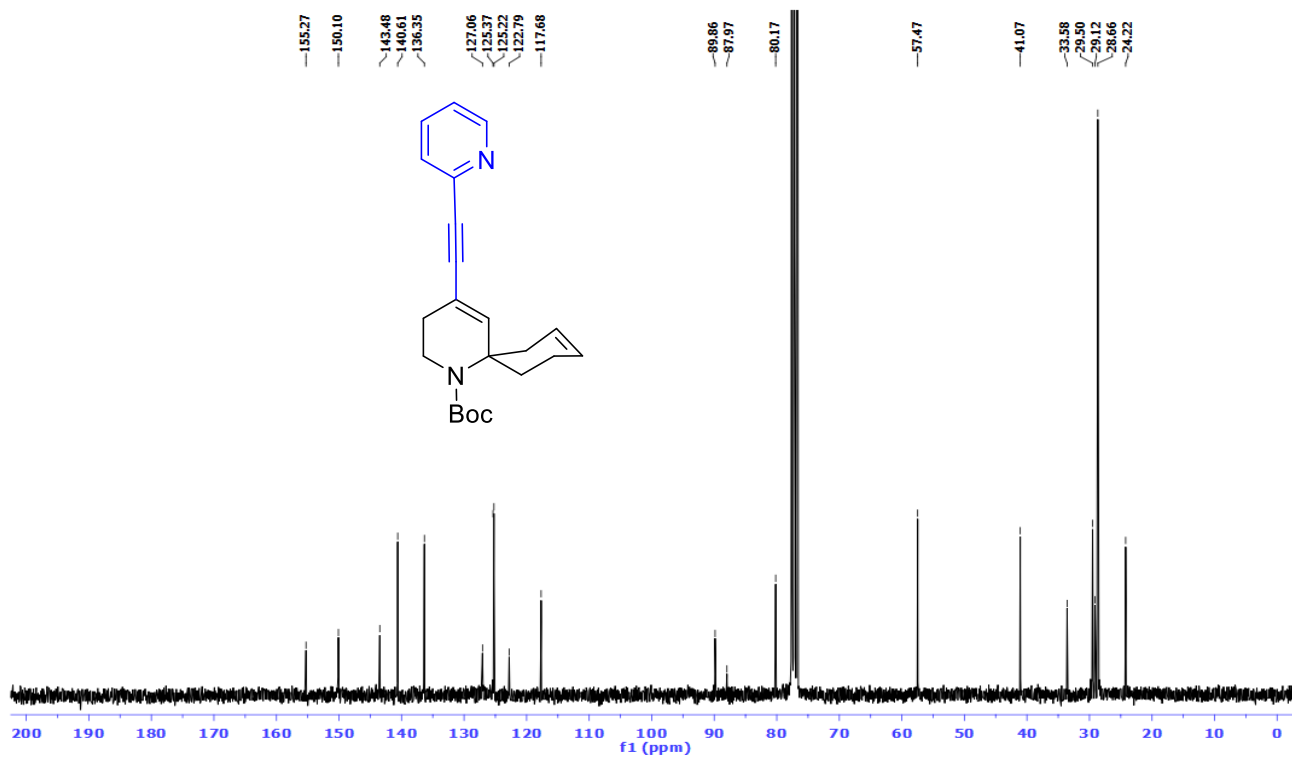

<sup>1</sup>H NMR of **8c** (300 MHz, CDCl<sub>3</sub>)

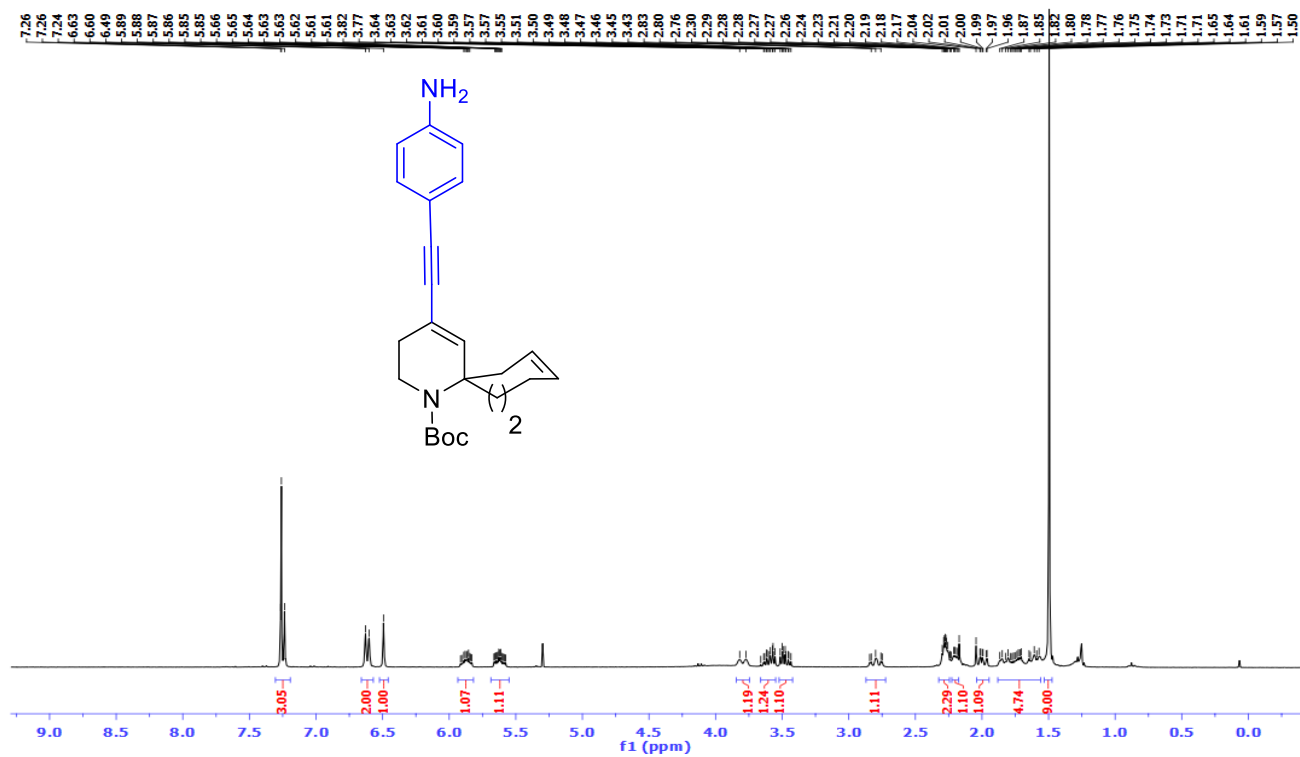

<sup>13</sup>C NMR of **8c** (75 MHz, CDCl<sub>3</sub>)

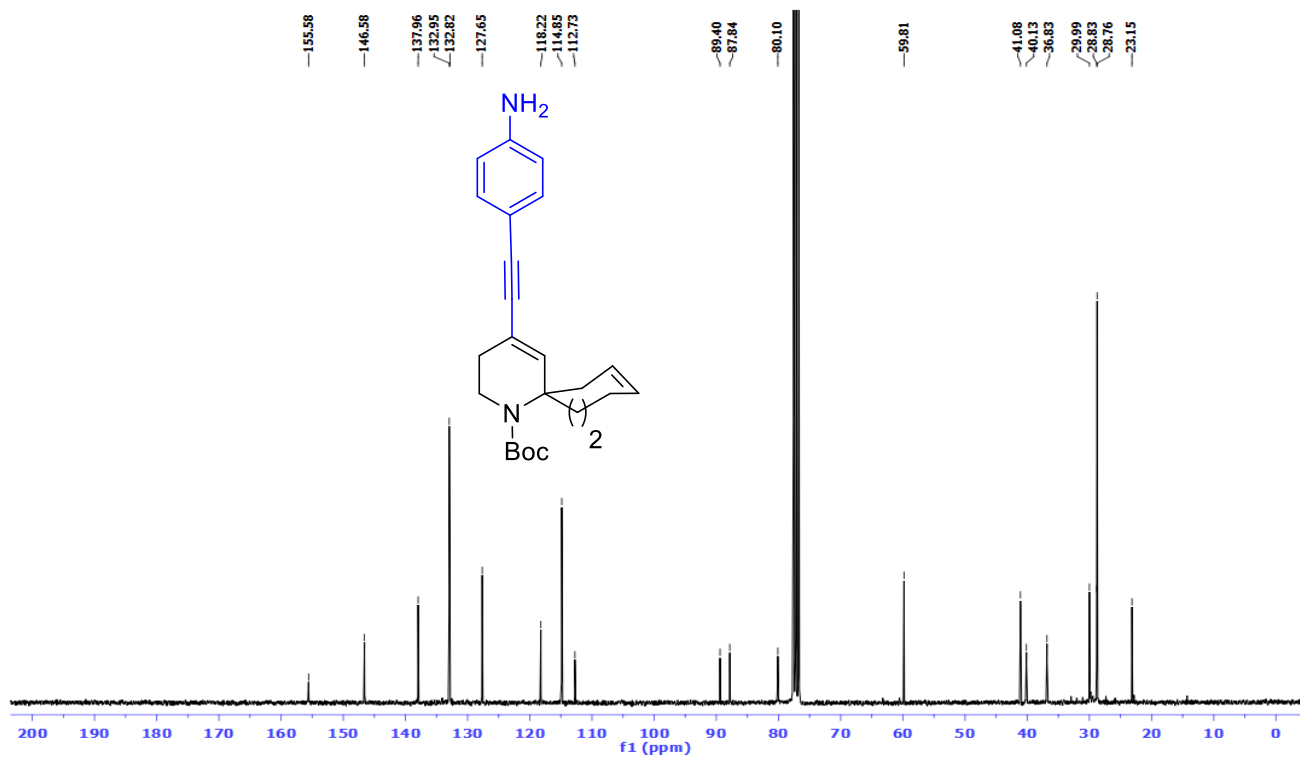

Supplement: d3ob00545c1.pdf [file d3ob00545c1.pdf]
